# Supplementary material
Source: PubMed Central journal article supplement (PMC5600205)
Supplement: NIHMS867738-supplement-Supplemental_Digital_Content.pdf [file NIHMS867738-supplement-Supplemental_Digital_Content.pdf]

## Appendix 1. Survey Instrument

| #                                                                       | Variable / Field Name | Field Label<br><i>Field Note</i>                                                                                                                                                                        | Field Attributes (Field Type, Validation, Choices, Calculations, etc.)                                                                                                                                                                                                                                                                                                                              |   |   |   |   |   |   |   |   |   |   |   |   |   |   |   |   |   |   |   |   |    |    |
|-------------------------------------------------------------------------|-----------------------|---------------------------------------------------------------------------------------------------------------------------------------------------------------------------------------------------------|-----------------------------------------------------------------------------------------------------------------------------------------------------------------------------------------------------------------------------------------------------------------------------------------------------------------------------------------------------------------------------------------------------|---|---|---|---|---|---|---|---|---|---|---|---|---|---|---|---|---|---|---|---|----|----|
| Instrument: <b>SURVEY Data Collection Form Opioid Med Post CS Study</b> |                       |                                                                                                                                                                                                         |                                                                                                                                                                                                                                                                                                                                                                                                     |   |   |   |   |   |   |   |   |   |   |   |   |   |   |   |   |   |   |   |   |    |    |
| 1                                                                       | record_id             | Record ID                                                                                                                                                                                               | text                                                                                                                                                                                                                                                                                                                                                                                                |   |   |   |   |   |   |   |   |   |   |   |   |   |   |   |   |   |   |   |   |    |    |
| 2                                                                       | study_id              | Study ID                                                                                                                                                                                                | text                                                                                                                                                                                                                                                                                                                                                                                                |   |   |   |   |   |   |   |   |   |   |   |   |   |   |   |   |   |   |   |   |    |    |
| 3                                                                       | verbal_consent_given  | Verbal Consent Given?<br><br>[Grab your reader's attention with a great quote from the document or use this space to emphasize a key point. To place this text box anywhere on the page, just drag it.] | yesno                                                                                                                                                                                                                                                                                                                                                                                               |   |   |   |   |   |   |   |   |   |   |   |   |   |   |   |   |   |   |   |   |    |    |
| 4                                                                       | date_consent          | Date of Consent:<br><i>Please enter as: MM/DD/YYYY</i>                                                                                                                                                  | text                                                                                                                                                                                                                                                                                                                                                                                                |   |   |   |   |   |   |   |   |   |   |   |   |   |   |   |   |   |   |   |   |    |    |
| 5                                                                       | time_consent          | Time of Consent:<br><i>Please enter as: hh:mm am/pm</i>                                                                                                                                                 | text                                                                                                                                                                                                                                                                                                                                                                                                |   |   |   |   |   |   |   |   |   |   |   |   |   |   |   |   |   |   |   |   |    |    |
| 6                                                                       | pain_hosp_day_cs      | 1, During hospitalization, on day of CS?                                                                                                                                                                | radio (Matrix), Required<br><table border="1"> <tr><td>0</td><td>0</td></tr> <tr><td>1</td><td>1</td></tr> <tr><td>2</td><td>2</td></tr> <tr><td>3</td><td>3</td></tr> <tr><td>4</td><td>4</td></tr> <tr><td>5</td><td>5</td></tr> <tr><td>6</td><td>6</td></tr> <tr><td>7</td><td>7</td></tr> <tr><td>8</td><td>8</td></tr> <tr><td>9</td><td>9</td></tr> <tr><td>10</td><td>10</td></tr> </table> | 0 | 0 | 1 | 1 | 2 | 2 | 3 | 3 | 4 | 4 | 5 | 5 | 6 | 6 | 7 | 7 | 8 | 8 | 9 | 9 | 10 | 10 |
| 0                                                                       | 0                     |                                                                                                                                                                                                         |                                                                                                                                                                                                                                                                                                                                                                                                     |   |   |   |   |   |   |   |   |   |   |   |   |   |   |   |   |   |   |   |   |    |    |
| 1                                                                       | 1                     |                                                                                                                                                                                                         |                                                                                                                                                                                                                                                                                                                                                                                                     |   |   |   |   |   |   |   |   |   |   |   |   |   |   |   |   |   |   |   |   |    |    |
| 2                                                                       | 2                     |                                                                                                                                                                                                         |                                                                                                                                                                                                                                                                                                                                                                                                     |   |   |   |   |   |   |   |   |   |   |   |   |   |   |   |   |   |   |   |   |    |    |
| 3                                                                       | 3                     |                                                                                                                                                                                                         |                                                                                                                                                                                                                                                                                                                                                                                                     |   |   |   |   |   |   |   |   |   |   |   |   |   |   |   |   |   |   |   |   |    |    |
| 4                                                                       | 4                     |                                                                                                                                                                                                         |                                                                                                                                                                                                                                                                                                                                                                                                     |   |   |   |   |   |   |   |   |   |   |   |   |   |   |   |   |   |   |   |   |    |    |
| 5                                                                       | 5                     |                                                                                                                                                                                                         |                                                                                                                                                                                                                                                                                                                                                                                                     |   |   |   |   |   |   |   |   |   |   |   |   |   |   |   |   |   |   |   |   |    |    |
| 6                                                                       | 6                     |                                                                                                                                                                                                         |                                                                                                                                                                                                                                                                                                                                                                                                     |   |   |   |   |   |   |   |   |   |   |   |   |   |   |   |   |   |   |   |   |    |    |
| 7                                                                       | 7                     |                                                                                                                                                                                                         |                                                                                                                                                                                                                                                                                                                                                                                                     |   |   |   |   |   |   |   |   |   |   |   |   |   |   |   |   |   |   |   |   |    |    |
| 8                                                                       | 8                     |                                                                                                                                                                                                         |                                                                                                                                                                                                                                                                                                                                                                                                     |   |   |   |   |   |   |   |   |   |   |   |   |   |   |   |   |   |   |   |   |    |    |
| 9                                                                       | 9                     |                                                                                                                                                                                                         |                                                                                                                                                                                                                                                                                                                                                                                                     |   |   |   |   |   |   |   |   |   |   |   |   |   |   |   |   |   |   |   |   |    |    |
| 10                                                                      | 10                    |                                                                                                                                                                                                         |                                                                                                                                                                                                                                                                                                                                                                                                     |   |   |   |   |   |   |   |   |   |   |   |   |   |   |   |   |   |   |   |   |    |    |
| 7                                                                       | pain_hosp_until_disch | 2, During remainder of hospitalization (until discharge)?                                                                                                                                               | radio (Matrix), Required<br><table border="1"> <tr><td>0</td><td>0</td></tr> <tr><td>1</td><td>1</td></tr> <tr><td>2</td><td>2</td></tr> <tr><td>3</td><td>3</td></tr> <tr><td>4</td><td>4</td></tr> <tr><td>5</td><td>5</td></tr> </table>                                                                                                                                                         | 0 | 0 | 1 | 1 | 2 | 2 | 3 | 3 | 4 | 4 | 5 | 5 |   |   |   |   |   |   |   |   |    |    |
| 0                                                                       | 0                     |                                                                                                                                                                                                         |                                                                                                                                                                                                                                                                                                                                                                                                     |   |   |   |   |   |   |   |   |   |   |   |   |   |   |   |   |   |   |   |   |    |    |
| 1                                                                       | 1                     |                                                                                                                                                                                                         |                                                                                                                                                                                                                                                                                                                                                                                                     |   |   |   |   |   |   |   |   |   |   |   |   |   |   |   |   |   |   |   |   |    |    |
| 2                                                                       | 2                     |                                                                                                                                                                                                         |                                                                                                                                                                                                                                                                                                                                                                                                     |   |   |   |   |   |   |   |   |   |   |   |   |   |   |   |   |   |   |   |   |    |    |
| 3                                                                       | 3                     |                                                                                                                                                                                                         |                                                                                                                                                                                                                                                                                                                                                                                                     |   |   |   |   |   |   |   |   |   |   |   |   |   |   |   |   |   |   |   |   |    |    |
| 4                                                                       | 4                     |                                                                                                                                                                                                         |                                                                                                                                                                                                                                                                                                                                                                                                     |   |   |   |   |   |   |   |   |   |   |   |   |   |   |   |   |   |   |   |   |    |    |
| 5                                                                       | 5                     |                                                                                                                                                                                                         |                                                                                                                                                                                                                                                                                                                                                                                                     |   |   |   |   |   |   |   |   |   |   |   |   |   |   |   |   |   |   |   |   |    |    |

Bateman BT, Cole NM, Maeda A, Burns SM, Houle TT, Huybrechts KF, et al. Patterns of opioid prescription and use after cesarean delivery. *Obstet Gynecol* 2017; 130.

The authors provided this information as a supplement to their article.

©2017 American College of Obstetricians and Gynecologists.

|    |                           |                                                          |                                                                                                                                                                                                                                                                                                                                                                                                     |   |   |   |   |   |   |   |   |    |    |   |   |   |   |   |   |   |   |   |   |    |    |
|----|---------------------------|----------------------------------------------------------|-----------------------------------------------------------------------------------------------------------------------------------------------------------------------------------------------------------------------------------------------------------------------------------------------------------------------------------------------------------------------------------------------------|---|---|---|---|---|---|---|---|----|----|---|---|---|---|---|---|---|---|---|---|----|----|
|    |                           |                                                          | <table border="1"> <tr><td>6</td><td>6</td></tr> <tr><td>7</td><td>7</td></tr> <tr><td>8</td><td>8</td></tr> <tr><td>9</td><td>9</td></tr> <tr><td>10</td><td>10</td></tr> </table>                                                                                                                                                                                                                 | 6 | 6 | 7 | 7 | 8 | 8 | 9 | 9 | 10 | 10 |   |   |   |   |   |   |   |   |   |   |    |    |
| 6  | 6                         |                                                          |                                                                                                                                                                                                                                                                                                                                                                                                     |   |   |   |   |   |   |   |   |    |    |   |   |   |   |   |   |   |   |   |   |    |    |
| 7  | 7                         |                                                          |                                                                                                                                                                                                                                                                                                                                                                                                     |   |   |   |   |   |   |   |   |    |    |   |   |   |   |   |   |   |   |   |   |    |    |
| 8  | 8                         |                                                          |                                                                                                                                                                                                                                                                                                                                                                                                     |   |   |   |   |   |   |   |   |    |    |   |   |   |   |   |   |   |   |   |   |    |    |
| 9  | 9                         |                                                          |                                                                                                                                                                                                                                                                                                                                                                                                     |   |   |   |   |   |   |   |   |    |    |   |   |   |   |   |   |   |   |   |   |    |    |
| 10 | 10                        |                                                          |                                                                                                                                                                                                                                                                                                                                                                                                     |   |   |   |   |   |   |   |   |    |    |   |   |   |   |   |   |   |   |   |   |    |    |
| 8  | pain_imm_after_hosp_disch | 3, Right after hospital discharge?                       | radio (Matrix), Required<br><table border="1"> <tr><td>0</td><td>0</td></tr> <tr><td>1</td><td>1</td></tr> <tr><td>2</td><td>2</td></tr> <tr><td>3</td><td>3</td></tr> <tr><td>4</td><td>4</td></tr> <tr><td>5</td><td>5</td></tr> <tr><td>6</td><td>6</td></tr> <tr><td>7</td><td>7</td></tr> <tr><td>8</td><td>8</td></tr> <tr><td>9</td><td>9</td></tr> <tr><td>10</td><td>10</td></tr> </table> | 0 | 0 | 1 | 1 | 2 | 2 | 3 | 3 | 4  | 4  | 5 | 5 | 6 | 6 | 7 | 7 | 8 | 8 | 9 | 9 | 10 | 10 |
| 0  | 0                         |                                                          |                                                                                                                                                                                                                                                                                                                                                                                                     |   |   |   |   |   |   |   |   |    |    |   |   |   |   |   |   |   |   |   |   |    |    |
| 1  | 1                         |                                                          |                                                                                                                                                                                                                                                                                                                                                                                                     |   |   |   |   |   |   |   |   |    |    |   |   |   |   |   |   |   |   |   |   |    |    |
| 2  | 2                         |                                                          |                                                                                                                                                                                                                                                                                                                                                                                                     |   |   |   |   |   |   |   |   |    |    |   |   |   |   |   |   |   |   |   |   |    |    |
| 3  | 3                         |                                                          |                                                                                                                                                                                                                                                                                                                                                                                                     |   |   |   |   |   |   |   |   |    |    |   |   |   |   |   |   |   |   |   |   |    |    |
| 4  | 4                         |                                                          |                                                                                                                                                                                                                                                                                                                                                                                                     |   |   |   |   |   |   |   |   |    |    |   |   |   |   |   |   |   |   |   |   |    |    |
| 5  | 5                         |                                                          |                                                                                                                                                                                                                                                                                                                                                                                                     |   |   |   |   |   |   |   |   |    |    |   |   |   |   |   |   |   |   |   |   |    |    |
| 6  | 6                         |                                                          |                                                                                                                                                                                                                                                                                                                                                                                                     |   |   |   |   |   |   |   |   |    |    |   |   |   |   |   |   |   |   |   |   |    |    |
| 7  | 7                         |                                                          |                                                                                                                                                                                                                                                                                                                                                                                                     |   |   |   |   |   |   |   |   |    |    |   |   |   |   |   |   |   |   |   |   |    |    |
| 8  | 8                         |                                                          |                                                                                                                                                                                                                                                                                                                                                                                                     |   |   |   |   |   |   |   |   |    |    |   |   |   |   |   |   |   |   |   |   |    |    |
| 9  | 9                         |                                                          |                                                                                                                                                                                                                                                                                                                                                                                                     |   |   |   |   |   |   |   |   |    |    |   |   |   |   |   |   |   |   |   |   |    |    |
| 10 | 10                        |                                                          |                                                                                                                                                                                                                                                                                                                                                                                                     |   |   |   |   |   |   |   |   |    |    |   |   |   |   |   |   |   |   |   |   |    |    |
| 9  | pain_1st_week_disch       | 4, During the first week after discharge?                | radio (Matrix), Required<br><table border="1"> <tr><td>0</td><td>0</td></tr> <tr><td>1</td><td>1</td></tr> <tr><td>2</td><td>2</td></tr> <tr><td>3</td><td>3</td></tr> <tr><td>4</td><td>4</td></tr> <tr><td>5</td><td>5</td></tr> <tr><td>6</td><td>6</td></tr> <tr><td>7</td><td>7</td></tr> <tr><td>8</td><td>8</td></tr> <tr><td>9</td><td>9</td></tr> <tr><td>10</td><td>10</td></tr> </table> | 0 | 0 | 1 | 1 | 2 | 2 | 3 | 3 | 4  | 4  | 5 | 5 | 6 | 6 | 7 | 7 | 8 | 8 | 9 | 9 | 10 | 10 |
| 0  | 0                         |                                                          |                                                                                                                                                                                                                                                                                                                                                                                                     |   |   |   |   |   |   |   |   |    |    |   |   |   |   |   |   |   |   |   |   |    |    |
| 1  | 1                         |                                                          |                                                                                                                                                                                                                                                                                                                                                                                                     |   |   |   |   |   |   |   |   |    |    |   |   |   |   |   |   |   |   |   |   |    |    |
| 2  | 2                         |                                                          |                                                                                                                                                                                                                                                                                                                                                                                                     |   |   |   |   |   |   |   |   |    |    |   |   |   |   |   |   |   |   |   |   |    |    |
| 3  | 3                         |                                                          |                                                                                                                                                                                                                                                                                                                                                                                                     |   |   |   |   |   |   |   |   |    |    |   |   |   |   |   |   |   |   |   |   |    |    |
| 4  | 4                         |                                                          |                                                                                                                                                                                                                                                                                                                                                                                                     |   |   |   |   |   |   |   |   |    |    |   |   |   |   |   |   |   |   |   |   |    |    |
| 5  | 5                         |                                                          |                                                                                                                                                                                                                                                                                                                                                                                                     |   |   |   |   |   |   |   |   |    |    |   |   |   |   |   |   |   |   |   |   |    |    |
| 6  | 6                         |                                                          |                                                                                                                                                                                                                                                                                                                                                                                                     |   |   |   |   |   |   |   |   |    |    |   |   |   |   |   |   |   |   |   |   |    |    |
| 7  | 7                         |                                                          |                                                                                                                                                                                                                                                                                                                                                                                                     |   |   |   |   |   |   |   |   |    |    |   |   |   |   |   |   |   |   |   |   |    |    |
| 8  | 8                         |                                                          |                                                                                                                                                                                                                                                                                                                                                                                                     |   |   |   |   |   |   |   |   |    |    |   |   |   |   |   |   |   |   |   |   |    |    |
| 9  | 9                         |                                                          |                                                                                                                                                                                                                                                                                                                                                                                                     |   |   |   |   |   |   |   |   |    |    |   |   |   |   |   |   |   |   |   |   |    |    |
| 10 | 10                        |                                                          |                                                                                                                                                                                                                                                                                                                                                                                                     |   |   |   |   |   |   |   |   |    |    |   |   |   |   |   |   |   |   |   |   |    |    |
| 10 | pain_2nd_week_disch       | 5, During the second week after discharge (roughly now)? | radio (Matrix), Required<br><table border="1"> <tr><td>0</td><td>0</td></tr> <tr><td>1</td><td>1</td></tr> <tr><td>2</td><td>2</td></tr> <tr><td>3</td><td>3</td></tr> <tr><td>4</td><td>4</td></tr> </table>                                                                                                                                                                                       | 0 | 0 | 1 | 1 | 2 | 2 | 3 | 3 | 4  | 4  |   |   |   |   |   |   |   |   |   |   |    |    |
| 0  | 0                         |                                                          |                                                                                                                                                                                                                                                                                                                                                                                                     |   |   |   |   |   |   |   |   |    |    |   |   |   |   |   |   |   |   |   |   |    |    |
| 1  | 1                         |                                                          |                                                                                                                                                                                                                                                                                                                                                                                                     |   |   |   |   |   |   |   |   |    |    |   |   |   |   |   |   |   |   |   |   |    |    |
| 2  | 2                         |                                                          |                                                                                                                                                                                                                                                                                                                                                                                                     |   |   |   |   |   |   |   |   |    |    |   |   |   |   |   |   |   |   |   |   |    |    |
| 3  | 3                         |                                                          |                                                                                                                                                                                                                                                                                                                                                                                                     |   |   |   |   |   |   |   |   |    |    |   |   |   |   |   |   |   |   |   |   |    |    |
| 4  | 4                         |                                                          |                                                                                                                                                                                                                                                                                                                                                                                                     |   |   |   |   |   |   |   |   |    |    |   |   |   |   |   |   |   |   |   |   |    |    |

Bateman BT, Cole NM, Maeda A, Burns SM, Houle TT, Huybrechts KF, et al. Patterns of opioid prescription and use after cesarean delivery. *Obstet Gynecol* 2017; 130.

The authors provided this information as a supplement to their article.

©2017 American College of Obstetricians and Gynecologists.

|    |                                                                                          |                                                                                                                    |                                                                                                                                                                                                                                                                                                                                                                                                                                                                                       |   |                             |                                     |    |                             |                              |   |                             |                   |   |                             |               |   |                             |       |   |   |   |   |   |    |    |
|----|------------------------------------------------------------------------------------------|--------------------------------------------------------------------------------------------------------------------|---------------------------------------------------------------------------------------------------------------------------------------------------------------------------------------------------------------------------------------------------------------------------------------------------------------------------------------------------------------------------------------------------------------------------------------------------------------------------------------|---|-----------------------------|-------------------------------------|----|-----------------------------|------------------------------|---|-----------------------------|-------------------|---|-----------------------------|---------------|---|-----------------------------|-------|---|---|---|---|---|----|----|
|    |                                                                                          |                                                                                                                    | <table border="1"> <tr><td>5</td><td>5</td></tr> <tr><td>6</td><td>6</td></tr> <tr><td>7</td><td>7</td></tr> <tr><td>8</td><td>8</td></tr> <tr><td>9</td><td>9</td></tr> <tr><td>10</td><td>10</td></tr> </table>                                                                                                                                                                                                                                                                     | 5 | 5                           | 6                                   | 6  | 7                           | 7                            | 8 | 8                           | 9                 | 9 | 10                          | 10            |   |                             |       |   |   |   |   |   |    |    |
| 5  | 5                                                                                        |                                                                                                                    |                                                                                                                                                                                                                                                                                                                                                                                                                                                                                       |   |                             |                                     |    |                             |                              |   |                             |                   |   |                             |               |   |                             |       |   |   |   |   |   |    |    |
| 6  | 6                                                                                        |                                                                                                                    |                                                                                                                                                                                                                                                                                                                                                                                                                                                                                       |   |                             |                                     |    |                             |                              |   |                             |                   |   |                             |               |   |                             |       |   |   |   |   |   |    |    |
| 7  | 7                                                                                        |                                                                                                                    |                                                                                                                                                                                                                                                                                                                                                                                                                                                                                       |   |                             |                                     |    |                             |                              |   |                             |                   |   |                             |               |   |                             |       |   |   |   |   |   |    |    |
| 8  | 8                                                                                        |                                                                                                                    |                                                                                                                                                                                                                                                                                                                                                                                                                                                                                       |   |                             |                                     |    |                             |                              |   |                             |                   |   |                             |               |   |                             |       |   |   |   |   |   |    |    |
| 9  | 9                                                                                        |                                                                                                                    |                                                                                                                                                                                                                                                                                                                                                                                                                                                                                       |   |                             |                                     |    |                             |                              |   |                             |                   |   |                             |               |   |                             |       |   |   |   |   |   |    |    |
| 10 | 10                                                                                       |                                                                                                                    |                                                                                                                                                                                                                                                                                                                                                                                                                                                                                       |   |                             |                                     |    |                             |                              |   |                             |                   |   |                             |               |   |                             |       |   |   |   |   |   |    |    |
| 11 | pain_at_rest                                                                             | 6, At rest, now?                                                                                                   | radio (Matrix), Required <table border="1"> <tr><td>0</td><td>0</td></tr> <tr><td>1</td><td>1</td></tr> <tr><td>2</td><td>2</td></tr> <tr><td>3</td><td>3</td></tr> <tr><td>4</td><td>4</td></tr> <tr><td>5</td><td>5</td></tr> <tr><td>6</td><td>6</td></tr> <tr><td>7</td><td>7</td></tr> <tr><td>8</td><td>8</td></tr> <tr><td>9</td><td>9</td></tr> <tr><td>10</td><td>10</td></tr> </table>                                                                                      | 0 | 0                           | 1                                   | 1  | 2                           | 2                            | 3 | 3                           | 4                 | 4 | 5                           | 5             | 6 | 6                           | 7     | 7 | 8 | 8 | 9 | 9 | 10 | 10 |
| 0  | 0                                                                                        |                                                                                                                    |                                                                                                                                                                                                                                                                                                                                                                                                                                                                                       |   |                             |                                     |    |                             |                              |   |                             |                   |   |                             |               |   |                             |       |   |   |   |   |   |    |    |
| 1  | 1                                                                                        |                                                                                                                    |                                                                                                                                                                                                                                                                                                                                                                                                                                                                                       |   |                             |                                     |    |                             |                              |   |                             |                   |   |                             |               |   |                             |       |   |   |   |   |   |    |    |
| 2  | 2                                                                                        |                                                                                                                    |                                                                                                                                                                                                                                                                                                                                                                                                                                                                                       |   |                             |                                     |    |                             |                              |   |                             |                   |   |                             |               |   |                             |       |   |   |   |   |   |    |    |
| 3  | 3                                                                                        |                                                                                                                    |                                                                                                                                                                                                                                                                                                                                                                                                                                                                                       |   |                             |                                     |    |                             |                              |   |                             |                   |   |                             |               |   |                             |       |   |   |   |   |   |    |    |
| 4  | 4                                                                                        |                                                                                                                    |                                                                                                                                                                                                                                                                                                                                                                                                                                                                                       |   |                             |                                     |    |                             |                              |   |                             |                   |   |                             |               |   |                             |       |   |   |   |   |   |    |    |
| 5  | 5                                                                                        |                                                                                                                    |                                                                                                                                                                                                                                                                                                                                                                                                                                                                                       |   |                             |                                     |    |                             |                              |   |                             |                   |   |                             |               |   |                             |       |   |   |   |   |   |    |    |
| 6  | 6                                                                                        |                                                                                                                    |                                                                                                                                                                                                                                                                                                                                                                                                                                                                                       |   |                             |                                     |    |                             |                              |   |                             |                   |   |                             |               |   |                             |       |   |   |   |   |   |    |    |
| 7  | 7                                                                                        |                                                                                                                    |                                                                                                                                                                                                                                                                                                                                                                                                                                                                                       |   |                             |                                     |    |                             |                              |   |                             |                   |   |                             |               |   |                             |       |   |   |   |   |   |    |    |
| 8  | 8                                                                                        |                                                                                                                    |                                                                                                                                                                                                                                                                                                                                                                                                                                                                                       |   |                             |                                     |    |                             |                              |   |                             |                   |   |                             |               |   |                             |       |   |   |   |   |   |    |    |
| 9  | 9                                                                                        |                                                                                                                    |                                                                                                                                                                                                                                                                                                                                                                                                                                                                                       |   |                             |                                     |    |                             |                              |   |                             |                   |   |                             |               |   |                             |       |   |   |   |   |   |    |    |
| 10 | 10                                                                                       |                                                                                                                    |                                                                                                                                                                                                                                                                                                                                                                                                                                                                                       |   |                             |                                     |    |                             |                              |   |                             |                   |   |                             |               |   |                             |       |   |   |   |   |   |    |    |
| 12 | seek_addl_med_care_pain                                                                  | Did you seek any additional medical care for your pain since you left the hospital?                                | radio, Required <table border="1"> <tr><td>1</td><td>Yes</td></tr> <tr><td>2</td><td>No</td></tr> <tr><td>3</td><td>Don't know</td></tr> <tr><td>4</td><td>Refused to answer</td></tr> </table>                                                                                                                                                                                                                                                                                       | 1 | Yes                         | 2                                   | No | 3                           | Don't know                   | 4 | Refused to answer           |                   |   |                             |               |   |                             |       |   |   |   |   |   |    |    |
| 1  | Yes                                                                                      |                                                                                                                    |                                                                                                                                                                                                                                                                                                                                                                                                                                                                                       |   |                             |                                     |    |                             |                              |   |                             |                   |   |                             |               |   |                             |       |   |   |   |   |   |    |    |
| 2  | No                                                                                       |                                                                                                                    |                                                                                                                                                                                                                                                                                                                                                                                                                                                                                       |   |                             |                                     |    |                             |                              |   |                             |                   |   |                             |               |   |                             |       |   |   |   |   |   |    |    |
| 3  | Don't know                                                                               |                                                                                                                    |                                                                                                                                                                                                                                                                                                                                                                                                                                                                                       |   |                             |                                     |    |                             |                              |   |                             |                   |   |                             |               |   |                             |       |   |   |   |   |   |    |    |
| 4  | Refused to answer                                                                        |                                                                                                                    |                                                                                                                                                                                                                                                                                                                                                                                                                                                                                       |   |                             |                                     |    |                             |                              |   |                             |                   |   |                             |               |   |                             |       |   |   |   |   |   |    |    |
| 13 | yes_sought_addl_med_care<br>Show the field ONLY if:<br>[seek_addl_med_care_pain] = '1'   | If yes: Check all that apply                                                                                       | checkbox, Required <table border="1"> <tr><td>1</td><td>yes_sought_addl_med_care__1</td><td>Go back to your doctor (outpatient)</td></tr> <tr><td>2</td><td>yes_sought_addl_med_care__2</td><td>Re-admission to the hospital</td></tr> <tr><td>3</td><td>yes_sought_addl_med_care__3</td><td>Emergency clinics</td></tr> <tr><td>4</td><td>yes_sought_addl_med_care__4</td><td>Minute clinic</td></tr> <tr><td>5</td><td>yes_sought_addl_med_care__5</td><td>Other</td></tr> </table> | 1 | yes_sought_addl_med_care__1 | Go back to your doctor (outpatient) | 2  | yes_sought_addl_med_care__2 | Re-admission to the hospital | 3 | yes_sought_addl_med_care__3 | Emergency clinics | 4 | yes_sought_addl_med_care__4 | Minute clinic | 5 | yes_sought_addl_med_care__5 | Other |   |   |   |   |   |    |    |
| 1  | yes_sought_addl_med_care__1                                                              | Go back to your doctor (outpatient)                                                                                |                                                                                                                                                                                                                                                                                                                                                                                                                                                                                       |   |                             |                                     |    |                             |                              |   |                             |                   |   |                             |               |   |                             |       |   |   |   |   |   |    |    |
| 2  | yes_sought_addl_med_care__2                                                              | Re-admission to the hospital                                                                                       |                                                                                                                                                                                                                                                                                                                                                                                                                                                                                       |   |                             |                                     |    |                             |                              |   |                             |                   |   |                             |               |   |                             |       |   |   |   |   |   |    |    |
| 3  | yes_sought_addl_med_care__3                                                              | Emergency clinics                                                                                                  |                                                                                                                                                                                                                                                                                                                                                                                                                                                                                       |   |                             |                                     |    |                             |                              |   |                             |                   |   |                             |               |   |                             |       |   |   |   |   |   |    |    |
| 4  | yes_sought_addl_med_care__4                                                              | Minute clinic                                                                                                      |                                                                                                                                                                                                                                                                                                                                                                                                                                                                                       |   |                             |                                     |    |                             |                              |   |                             |                   |   |                             |               |   |                             |       |   |   |   |   |   |    |    |
| 5  | yes_sought_addl_med_care__5                                                              | Other                                                                                                              |                                                                                                                                                                                                                                                                                                                                                                                                                                                                                       |   |                             |                                     |    |                             |                              |   |                             |                   |   |                             |               |   |                             |       |   |   |   |   |   |    |    |
| 14 | comment_addl_med_care_pain<br>Show the field ONLY if:<br>[seek_addl_med_care_pain] = '1' | If yes to additional medical care for pain, please comment:                                                        | notes                                                                                                                                                                                                                                                                                                                                                                                                                                                                                 |   |                             |                                     |    |                             |                              |   |                             |                   |   |                             |               |   |                             |       |   |   |   |   |   |    |    |
| 15 | other_addl_med_care<br>Show the field ONLY if:<br>[yes_sought_addl_med_care(5)] = '1'    | If other: Please specify<br><i>Note: May include acupuncture, massage, other medicine from friends/family, etc</i> | notes                                                                                                                                                                                                                                                                                                                                                                                                                                                                                 |   |                             |                                     |    |                             |                              |   |                             |                   |   |                             |               |   |                             |       |   |   |   |   |   |    |    |

Bateman BT, Cole NM, Maeda A, Burns SM, Houle TT, Huybrechts KF, et al. Patterns of opioid prescription and use after cesarean delivery. *Obstet Gynecol* 2017; 130.

The authors provided this information as a supplement to their article.

©2017 American College of Obstetricians and Gynecologists.

|    |                                                                                                                                                                                     |                                                                                                                |                                                                                                                                                                                                                                                                                                                                                                                                                                                                                                                                                                                                                                                                               |   |                         |                   |                         |                      |                                   |   |                      |                                           |   |                      |                   |   |                      |                     |   |                      |                                        |   |                      |       |
|----|-------------------------------------------------------------------------------------------------------------------------------------------------------------------------------------|----------------------------------------------------------------------------------------------------------------|-------------------------------------------------------------------------------------------------------------------------------------------------------------------------------------------------------------------------------------------------------------------------------------------------------------------------------------------------------------------------------------------------------------------------------------------------------------------------------------------------------------------------------------------------------------------------------------------------------------------------------------------------------------------------------|---|-------------------------|-------------------|-------------------------|----------------------|-----------------------------------|---|----------------------|-------------------------------------------|---|----------------------|-------------------|---|----------------------|---------------------|---|----------------------|----------------------------------------|---|----------------------|-------|
| 16 | cs_planned_or_expect                                                                                                                                                                | Was your CS planned or unexpected?                                                                             | radio, Required<br><table border="1"> <tr> <td>1</td> <td>Planned</td> </tr> <tr> <td>2</td> <td>Unexpected</td> </tr> </table>                                                                                                                                                                                                                                                                                                                                                                                                                                                                                                                                               | 1 | Planned                 | 2                 | Unexpected              |                      |                                   |   |                      |                                           |   |                      |                   |   |                      |                     |   |                      |                                        |   |                      |       |
| 1  | Planned                                                                                                                                                                             |                                                                                                                |                                                                                                                                                                                                                                                                                                                                                                                                                                                                                                                                                                                                                                                                               |   |                         |                   |                         |                      |                                   |   |                      |                                           |   |                      |                   |   |                      |                     |   |                      |                                        |   |                      |       |
| 2  | Unexpected                                                                                                                                                                          |                                                                                                                |                                                                                                                                                                                                                                                                                                                                                                                                                                                                                                                                                                                                                                                                               |   |                         |                   |                         |                      |                                   |   |                      |                                           |   |                      |                   |   |                      |                     |   |                      |                                        |   |                      |       |
| 17 | planned_cs_pain_expect<br>Show the field ONLY if:<br>[cs_planned_or_expect] = '1'                                                                                                   | If planned: Do you think it's normal to experience some pain after CS?                                         | radio<br><table border="1"> <tr> <td>1</td> <td>None</td> </tr> <tr> <td>2</td> <td>A little</td> </tr> <tr> <td>3</td> <td>A moderate amount</td> </tr> <tr> <td>4</td> <td>A lot</td> </tr> </table>                                                                                                                                                                                                                                                                                                                                                                                                                                                                        | 1 | None                    | 2                 | A little                | 3                    | A moderate amount                 | 4 | A lot                |                                           |   |                      |                   |   |                      |                     |   |                      |                                        |   |                      |       |
| 1  | None                                                                                                                                                                                |                                                                                                                |                                                                                                                                                                                                                                                                                                                                                                                                                                                                                                                                                                                                                                                                               |   |                         |                   |                         |                      |                                   |   |                      |                                           |   |                      |                   |   |                      |                     |   |                      |                                        |   |                      |       |
| 2  | A little                                                                                                                                                                            |                                                                                                                |                                                                                                                                                                                                                                                                                                                                                                                                                                                                                                                                                                                                                                                                               |   |                         |                   |                         |                      |                                   |   |                      |                                           |   |                      |                   |   |                      |                     |   |                      |                                        |   |                      |       |
| 3  | A moderate amount                                                                                                                                                                   |                                                                                                                |                                                                                                                                                                                                                                                                                                                                                                                                                                                                                                                                                                                                                                                                               |   |                         |                   |                         |                      |                                   |   |                      |                                           |   |                      |                   |   |                      |                     |   |                      |                                        |   |                      |       |
| 4  | A lot                                                                                                                                                                               |                                                                                                                |                                                                                                                                                                                                                                                                                                                                                                                                                                                                                                                                                                                                                                                                               |   |                         |                   |                         |                      |                                   |   |                      |                                           |   |                      |                   |   |                      |                     |   |                      |                                        |   |                      |       |
| 18 | level_of_pain_expected<br>Show the field ONLY if:<br>[cs_planned_or_expect] = '1'                                                                                                   | Overall, more or less pain than expected for this CS?                                                          | radio, Required<br><table border="1"> <tr> <td>1</td> <td>More pain than expected</td> </tr> <tr> <td>2</td> <td>Less pain than expected</td> </tr> <tr> <td>3</td> <td>As much pain as expected</td> </tr> </table>                                                                                                                                                                                                                                                                                                                                                                                                                                                          | 1 | More pain than expected | 2                 | Less pain than expected | 3                    | As much pain as expected          |   |                      |                                           |   |                      |                   |   |                      |                     |   |                      |                                        |   |                      |       |
| 1  | More pain than expected                                                                                                                                                             |                                                                                                                |                                                                                                                                                                                                                                                                                                                                                                                                                                                                                                                                                                                                                                                                               |   |                         |                   |                         |                      |                                   |   |                      |                                           |   |                      |                   |   |                      |                     |   |                      |                                        |   |                      |       |
| 2  | Less pain than expected                                                                                                                                                             |                                                                                                                |                                                                                                                                                                                                                                                                                                                                                                                                                                                                                                                                                                                                                                                                               |   |                         |                   |                         |                      |                                   |   |                      |                                           |   |                      |                   |   |                      |                     |   |                      |                                        |   |                      |       |
| 3  | As much pain as expected                                                                                                                                                            |                                                                                                                |                                                                                                                                                                                                                                                                                                                                                                                                                                                                                                                                                                                                                                                                               |   |                         |                   |                         |                      |                                   |   |                      |                                           |   |                      |                   |   |                      |                     |   |                      |                                        |   |                      |       |
| 19 | did_you_fill_an_rx                                                                                                                                                                  | Did you fill a prescription for a pain medication after your CS? (e.g. oxycodone, percocet, hydrocodone, etc?) | radio, Required<br><table border="1"> <tr> <td>1</td> <td>Yes</td> </tr> <tr> <td>2</td> <td>No</td> </tr> <tr> <td>3</td> <td>Don't know</td> </tr> <tr> <td>4</td> <td>Refused to answer</td> </tr> </table>                                                                                                                                                                                                                                                                                                                                                                                                                                                                | 1 | Yes                     | 2                 | No                      | 3                    | Don't know                        | 4 | Refused to answer    |                                           |   |                      |                   |   |                      |                     |   |                      |                                        |   |                      |       |
| 1  | Yes                                                                                                                                                                                 |                                                                                                                |                                                                                                                                                                                                                                                                                                                                                                                                                                                                                                                                                                                                                                                                               |   |                         |                   |                         |                      |                                   |   |                      |                                           |   |                      |                   |   |                      |                     |   |                      |                                        |   |                      |       |
| 2  | No                                                                                                                                                                                  |                                                                                                                |                                                                                                                                                                                                                                                                                                                                                                                                                                                                                                                                                                                                                                                                               |   |                         |                   |                         |                      |                                   |   |                      |                                           |   |                      |                   |   |                      |                     |   |                      |                                        |   |                      |       |
| 3  | Don't know                                                                                                                                                                          |                                                                                                                |                                                                                                                                                                                                                                                                                                                                                                                                                                                                                                                                                                                                                                                                               |   |                         |                   |                         |                      |                                   |   |                      |                                           |   |                      |                   |   |                      |                     |   |                      |                                        |   |                      |       |
| 4  | Refused to answer                                                                                                                                                                   |                                                                                                                |                                                                                                                                                                                                                                                                                                                                                                                                                                                                                                                                                                                                                                                                               |   |                         |                   |                         |                      |                                   |   |                      |                                           |   |                      |                   |   |                      |                     |   |                      |                                        |   |                      |       |
| 20 | why_rx_not_filled<br>Show the field ONLY if:<br>[did_you_fill_an_rx] = '2'                                                                                                          | Why didn't you fill the opioid prescription?                                                                   | checkbox, Required<br><table border="1"> <tr> <td>1</td> <td>why_rx_not_filled__1</td> <td>Did not need/want</td> </tr> <tr> <td>2</td> <td>why_rx_not_filled__2</td> <td>Do not like how they make me feel</td> </tr> <tr> <td>3</td> <td>why_rx_not_filled__3</td> <td>Bad side effects from previous experience</td> </tr> <tr> <td>4</td> <td>why_rx_not_filled__4</td> <td>Forgot to fill it</td> </tr> <tr> <td>5</td> <td>why_rx_not_filled__5</td> <td>Copay too expensive</td> </tr> <tr> <td>6</td> <td>why_rx_not_filled__6</td> <td>Already had a bottle of leftover pills</td> </tr> <tr> <td>7</td> <td>why_rx_not_filled__7</td> <td>Other</td> </tr> </table> | 1 | why_rx_not_filled__1    | Did not need/want | 2                       | why_rx_not_filled__2 | Do not like how they make me feel | 3 | why_rx_not_filled__3 | Bad side effects from previous experience | 4 | why_rx_not_filled__4 | Forgot to fill it | 5 | why_rx_not_filled__5 | Copay too expensive | 6 | why_rx_not_filled__6 | Already had a bottle of leftover pills | 7 | why_rx_not_filled__7 | Other |
| 1  | why_rx_not_filled__1                                                                                                                                                                | Did not need/want                                                                                              |                                                                                                                                                                                                                                                                                                                                                                                                                                                                                                                                                                                                                                                                               |   |                         |                   |                         |                      |                                   |   |                      |                                           |   |                      |                   |   |                      |                     |   |                      |                                        |   |                      |       |
| 2  | why_rx_not_filled__2                                                                                                                                                                | Do not like how they make me feel                                                                              |                                                                                                                                                                                                                                                                                                                                                                                                                                                                                                                                                                                                                                                                               |   |                         |                   |                         |                      |                                   |   |                      |                                           |   |                      |                   |   |                      |                     |   |                      |                                        |   |                      |       |
| 3  | why_rx_not_filled__3                                                                                                                                                                | Bad side effects from previous experience                                                                      |                                                                                                                                                                                                                                                                                                                                                                                                                                                                                                                                                                                                                                                                               |   |                         |                   |                         |                      |                                   |   |                      |                                           |   |                      |                   |   |                      |                     |   |                      |                                        |   |                      |       |
| 4  | why_rx_not_filled__4                                                                                                                                                                | Forgot to fill it                                                                                              |                                                                                                                                                                                                                                                                                                                                                                                                                                                                                                                                                                                                                                                                               |   |                         |                   |                         |                      |                                   |   |                      |                                           |   |                      |                   |   |                      |                     |   |                      |                                        |   |                      |       |
| 5  | why_rx_not_filled__5                                                                                                                                                                | Copay too expensive                                                                                            |                                                                                                                                                                                                                                                                                                                                                                                                                                                                                                                                                                                                                                                                               |   |                         |                   |                         |                      |                                   |   |                      |                                           |   |                      |                   |   |                      |                     |   |                      |                                        |   |                      |       |
| 6  | why_rx_not_filled__6                                                                                                                                                                | Already had a bottle of leftover pills                                                                         |                                                                                                                                                                                                                                                                                                                                                                                                                                                                                                                                                                                                                                                                               |   |                         |                   |                         |                      |                                   |   |                      |                                           |   |                      |                   |   |                      |                     |   |                      |                                        |   |                      |       |
| 7  | why_rx_not_filled__7                                                                                                                                                                | Other                                                                                                          |                                                                                                                                                                                                                                                                                                                                                                                                                                                                                                                                                                                                                                                                               |   |                         |                   |                         |                      |                                   |   |                      |                                           |   |                      |                   |   |                      |                     |   |                      |                                        |   |                      |       |
| 21 | no_rx_fill_other<br>Show the field ONLY if:<br>[why_rx_not_filled(7)] = '1'                                                                                                         | If other: Please specify                                                                                       | text                                                                                                                                                                                                                                                                                                                                                                                                                                                                                                                                                                                                                                                                          |   |                         |                   |                         |                      |                                   |   |                      |                                           |   |                      |                   |   |                      |                     |   |                      |                                        |   |                      |       |
| 22 | is_bottle_available<br>Show the field ONLY if:<br>[did_you_fill_an_rx] = '1' or<br>[why_rx_not_filled(6)] = '1' or<br>[did_you_fill_an_rx] = '1' or<br>[why_rx_not_filled(6)] = '1' | Do you have the bottle(s) available, and can you get them?                                                     | radio, Required<br><table border="1"> <tr> <td>1</td> <td>Yes</td> </tr> <tr> <td>2</td> <td>No</td> </tr> <tr> <td>3</td> <td>Don't know</td> </tr> <tr> <td>4</td> <td>Refused to answer</td> </tr> </table>                                                                                                                                                                                                                                                                                                                                                                                                                                                                | 1 | Yes                     | 2                 | No                      | 3                    | Don't know                        | 4 | Refused to answer    |                                           |   |                      |                   |   |                      |                     |   |                      |                                        |   |                      |       |
| 1  | Yes                                                                                                                                                                                 |                                                                                                                |                                                                                                                                                                                                                                                                                                                                                                                                                                                                                                                                                                                                                                                                               |   |                         |                   |                         |                      |                                   |   |                      |                                           |   |                      |                   |   |                      |                     |   |                      |                                        |   |                      |       |
| 2  | No                                                                                                                                                                                  |                                                                                                                |                                                                                                                                                                                                                                                                                                                                                                                                                                                                                                                                                                                                                                                                               |   |                         |                   |                         |                      |                                   |   |                      |                                           |   |                      |                   |   |                      |                     |   |                      |                                        |   |                      |       |
| 3  | Don't know                                                                                                                                                                          |                                                                                                                |                                                                                                                                                                                                                                                                                                                                                                                                                                                                                                                                                                                                                                                                               |   |                         |                   |                         |                      |                                   |   |                      |                                           |   |                      |                   |   |                      |                     |   |                      |                                        |   |                      |       |
| 4  | Refused to answer                                                                                                                                                                   |                                                                                                                |                                                                                                                                                                                                                                                                                                                                                                                                                                                                                                                                                                                                                                                                               |   |                         |                   |                         |                      |                                   |   |                      |                                           |   |                      |                   |   |                      |                     |   |                      |                                        |   |                      |       |
| 23 | call_back_na<br>Show the field ONLY if:<br>[is_bottle_available] = '3' or<br>[is_bottle_available] = '4' or                                                                         | Is there a good time to call you back when you'll have the bottle with you?                                    | radio<br><table border="1"> <tr> <td>1</td> <td>Yes</td> </tr> <tr> <td>2</td> <td>No</td> </tr> </table>                                                                                                                                                                                                                                                                                                                                                                                                                                                                                                                                                                     | 1 | Yes                     | 2                 | No                      |                      |                                   |   |                      |                                           |   |                      |                   |   |                      |                     |   |                      |                                        |   |                      |       |
| 1  | Yes                                                                                                                                                                                 |                                                                                                                |                                                                                                                                                                                                                                                                                                                                                                                                                                                                                                                                                                                                                                                                               |   |                         |                   |                         |                      |                                   |   |                      |                                           |   |                      |                   |   |                      |                     |   |                      |                                        |   |                      |       |
| 2  | No                                                                                                                                                                                  |                                                                                                                |                                                                                                                                                                                                                                                                                                                                                                                                                                                                                                                                                                                                                                                                               |   |                         |                   |                         |                      |                                   |   |                      |                                           |   |                      |                   |   |                      |                     |   |                      |                                        |   |                      |       |

Bateman BT, Cole NM, Maeda A, Burns SM, Houle TT, Huybrechts KF, et al. Patterns of opioid prescription and use after cesarean delivery. *Obstet Gynecol* 2017; 130.

The authors provided this information as a supplement to their article.

©2017 American College of Obstetricians and Gynecologists.

|    |                                                                                                                                       |                                                                                                              |                                                                                                                                                                                                                                                                                                                                                                                                   |   |                  |             |    |                  |            |   |                   |          |   |                  |               |   |                  |       |
|----|---------------------------------------------------------------------------------------------------------------------------------------|--------------------------------------------------------------------------------------------------------------|---------------------------------------------------------------------------------------------------------------------------------------------------------------------------------------------------------------------------------------------------------------------------------------------------------------------------------------------------------------------------------------------------|---|------------------|-------------|----|------------------|------------|---|-------------------|----------|---|------------------|---------------|---|------------------|-------|
|    | [why_script_unavailable(1)] = '1' or [why_script_unavailable(5)] = '1' or [why_script_unavailable(4)] = '1'                           |                                                                                                              | 3 Not applicable                                                                                                                                                                                                                                                                                                                                                                                  |   |                  |             |    |                  |            |   |                   |          |   |                  |               |   |                  |       |
| 24 | label_rx_type<br>Show the field ONLY if:<br>[is_bottle_available] = '1' or [why_rx_not_filled(6)] = '1'                               | Can you please read off the label, and state what type of opioid pain medication you have?                   | checkbox, Required<br><table border="1"> <tr> <td>1</td> <td>label_rx_type__1</td> <td>Hydrocodone</td> </tr> <tr> <td>2</td> <td>label_rx_type__2</td> <td>Oxycodone</td> </tr> <tr> <td>3</td> <td>label_rx_type__3</td> <td>Percocet</td> </tr> <tr> <td>4</td> <td>label_rx_type__4</td> <td>Hydromorphone</td> </tr> <tr> <td>5</td> <td>label_rx_type__5</td> <td>Other</td> </tr> </table> | 1 | label_rx_type__1 | Hydrocodone | 2  | label_rx_type__2 | Oxycodone  | 3 | label_rx_type__3  | Percocet | 4 | label_rx_type__4 | Hydromorphone | 5 | label_rx_type__5 | Other |
| 1  | label_rx_type__1                                                                                                                      | Hydrocodone                                                                                                  |                                                                                                                                                                                                                                                                                                                                                                                                   |   |                  |             |    |                  |            |   |                   |          |   |                  |               |   |                  |       |
| 2  | label_rx_type__2                                                                                                                      | Oxycodone                                                                                                    |                                                                                                                                                                                                                                                                                                                                                                                                   |   |                  |             |    |                  |            |   |                   |          |   |                  |               |   |                  |       |
| 3  | label_rx_type__3                                                                                                                      | Percocet                                                                                                     |                                                                                                                                                                                                                                                                                                                                                                                                   |   |                  |             |    |                  |            |   |                   |          |   |                  |               |   |                  |       |
| 4  | label_rx_type__4                                                                                                                      | Hydromorphone                                                                                                |                                                                                                                                                                                                                                                                                                                                                                                                   |   |                  |             |    |                  |            |   |                   |          |   |                  |               |   |                  |       |
| 5  | label_rx_type__5                                                                                                                      | Other                                                                                                        |                                                                                                                                                                                                                                                                                                                                                                                                   |   |                  |             |    |                  |            |   |                   |          |   |                  |               |   |                  |       |
| 25 | specify_other_painmed<br>Show the field ONLY if:<br>[label_rx_type(5)] = '1'                                                          | If other: Please specify                                                                                     | text, Required                                                                                                                                                                                                                                                                                                                                                                                    |   |                  |             |    |                  |            |   |                   |          |   |                  |               |   |                  |       |
| 26 | opioid_rx_strength<br>Show the field ONLY if:<br>[is_bottle_available] = '1' or [why_rx_not_filled(6)] = '1'                          | Can you please read off the label, and state the strength of the opioid pain medication(s) you have (in mg)? | text, Required                                                                                                                                                                                                                                                                                                                                                                                    |   |                  |             |    |                  |            |   |                   |          |   |                  |               |   |                  |       |
| 27 | opioid_tabs_dispensed<br>Show the field ONLY if:<br>[is_bottle_available] = '1' or [why_rx_not_filled(6)] = '1'                       | Can you please read off the label, and state how many tablets were dispensed?                                | text (integer, Min: 0, Max: 100), Required                                                                                                                                                                                                                                                                                                                                                        |   |                  |             |    |                  |            |   |                   |          |   |                  |               |   |                  |       |
| 28 | leftover_rx_initial_qty<br>Show the field ONLY if:<br>[why_rx_not_filled(6)] = '1'                                                    | For this leftover script, can you tell me how many leftover pills you started with?                          | text                                                                                                                                                                                                                                                                                                                                                                                              |   |                  |             |    |                  |            |   |                   |          |   |                  |               |   |                  |       |
| 29 | leftover_opioid_count<br>Show the field ONLY if:<br>[is_bottle_available] = '1' or [why_rx_not_filled(6)] = '1'                       | Can you count how many opioid pain medications you have left?                                                | text (integer), Required                                                                                                                                                                                                                                                                                                                                                                          |   |                  |             |    |                  |            |   |                   |          |   |                  |               |   |                  |       |
| 30 | throw_out_opioids<br>Show the field ONLY if:<br>[is_bottle_available] = '1' or [call_back_na] = '1' or [why_rx_not_filled(6)] = '1'   | Did you throw out any pills?                                                                                 | radio, Required<br><table border="1"> <tr> <td>1</td> <td>Yes</td> </tr> <tr> <td>2</td> <td>No</td> </tr> <tr> <td>3</td> <td>Don't know</td> </tr> <tr> <td>4</td> <td>Refused to answer</td> </tr> </table>                                                                                                                                                                                    | 1 | Yes              | 2           | No | 3                | Don't know | 4 | Refused to answer |          |   |                  |               |   |                  |       |
| 1  | Yes                                                                                                                                   |                                                                                                              |                                                                                                                                                                                                                                                                                                                                                                                                   |   |                  |             |    |                  |            |   |                   |          |   |                  |               |   |                  |       |
| 2  | No                                                                                                                                    |                                                                                                              |                                                                                                                                                                                                                                                                                                                                                                                                   |   |                  |             |    |                  |            |   |                   |          |   |                  |               |   |                  |       |
| 3  | Don't know                                                                                                                            |                                                                                                              |                                                                                                                                                                                                                                                                                                                                                                                                   |   |                  |             |    |                  |            |   |                   |          |   |                  |               |   |                  |       |
| 4  | Refused to answer                                                                                                                     |                                                                                                              |                                                                                                                                                                                                                                                                                                                                                                                                   |   |                  |             |    |                  |            |   |                   |          |   |                  |               |   |                  |       |
| 31 | number_opioids_disposed<br>Show the field ONLY if:<br>[throw_out_opioids] = '1'                                                       | How many pills did you throw out (can estimate)?                                                             | text                                                                                                                                                                                                                                                                                                                                                                                              |   |                  |             |    |                  |            |   |                   |          |   |                  |               |   |                  |       |
| 32 | still_taking_opioids<br>Show the field ONLY if:<br>[did_you_fill_an_rx] = '1' or [call_back_na] = '2' or [why_rx_not_filled(6)] = '1' | Are you still taking your opioid medications?                                                                | radio, Required<br><table border="1"> <tr> <td>1</td> <td>Yes</td> </tr> <tr> <td>2</td> <td>No</td> </tr> <tr> <td>3</td> <td>Don't know</td> </tr> <tr> <td>4</td> <td>Refused to answer</td> </tr> </table>                                                                                                                                                                                    | 1 | Yes              | 2           | No | 3                | Don't know | 4 | Refused to answer |          |   |                  |               |   |                  |       |
| 1  | Yes                                                                                                                                   |                                                                                                              |                                                                                                                                                                                                                                                                                                                                                                                                   |   |                  |             |    |                  |            |   |                   |          |   |                  |               |   |                  |       |
| 2  | No                                                                                                                                    |                                                                                                              |                                                                                                                                                                                                                                                                                                                                                                                                   |   |                  |             |    |                  |            |   |                   |          |   |                  |               |   |                  |       |
| 3  | Don't know                                                                                                                            |                                                                                                              |                                                                                                                                                                                                                                                                                                                                                                                                   |   |                  |             |    |                  |            |   |                   |          |   |                  |               |   |                  |       |
| 4  | Refused to answer                                                                                                                     |                                                                                                              |                                                                                                                                                                                                                                                                                                                                                                                                   |   |                  |             |    |                  |            |   |                   |          |   |                  |               |   |                  |       |
| 33 | on_opioids_call_back<br>Show the field ONLY if:                                                                                       | If yes, call back to complete/resume shortened                                                               | notes                                                                                                                                                                                                                                                                                                                                                                                             |   |                  |             |    |                  |            |   |                   |          |   |                  |               |   |                  |       |

Bateman BT, Cole NM, Maeda A, Burns SM, Houle TT, Huybrechts KF, et al. Patterns of opioid prescription and use after cesarean delivery. *Obstet Gynecol* 2017; 130.

The authors provided this information as a supplement to their article.

©2017 American College of Obstetricians and Gynecologists.

|    |                                                                                                                                                                                                                                                                                                                                                                                                            |                                                                                                                                 |                                                                                                                                                                                                                                                                                                                                                                                                                                                                                                                         |   |                            |                                 |   |                            |                    |   |                            |                     |   |                            |                   |   |                            |       |   |                            |            |
|----|------------------------------------------------------------------------------------------------------------------------------------------------------------------------------------------------------------------------------------------------------------------------------------------------------------------------------------------------------------------------------------------------------------|---------------------------------------------------------------------------------------------------------------------------------|-------------------------------------------------------------------------------------------------------------------------------------------------------------------------------------------------------------------------------------------------------------------------------------------------------------------------------------------------------------------------------------------------------------------------------------------------------------------------------------------------------------------------|---|----------------------------|---------------------------------|---|----------------------------|--------------------|---|----------------------------|---------------------|---|----------------------------|-------------------|---|----------------------------|-------|---|----------------------------|------------|
|    | [still_taking_opioids] = '1' or [plan_to_refill_opioids] = '1' or [call_back_na] = '1'                                                                                                                                                                                                                                                                                                                     | survey, and continue to call back until patient is done taking script(s). Can take notes here, if any:                          |                                                                                                                                                                                                                                                                                                                                                                                                                                                                                                                         |   |                            |                                 |   |                            |                    |   |                            |                     |   |                            |                   |   |                            |       |   |                            |            |
| 34 | why_script_unavailable<br>Show the field ONLY if:<br>[is_bottle_available] = '2' or [is_bottle_available] = '3' or [is_bottle_available] = '4'                                                                                                                                                                                                                                                             | Why don't you have your bottle available?                                                                                       | checkbox, Required<br><table border="1"> <tr> <td>1</td> <td>why_script_unavailable__1</td> <td>Bottle is not with me right now</td> </tr> <tr> <td>2</td> <td>why_script_unavailable__2</td> <td>Disposed of script</td> </tr> <tr> <td>3</td> <td>why_script_unavailable__3</td> <td>Finished the script</td> </tr> <tr> <td>4</td> <td>why_script_unavailable__4</td> <td>Refused to answer</td> </tr> <tr> <td>5</td> <td>why_script_unavailable__5</td> <td>Other</td> </tr> </table>                              | 1 | why_script_unavailable__1  | Bottle is not with me right now | 2 | why_script_unavailable__2  | Disposed of script | 3 | why_script_unavailable__3  | Finished the script | 4 | why_script_unavailable__4  | Refused to answer | 5 | why_script_unavailable__5  | Other |   |                            |            |
| 1  | why_script_unavailable__1                                                                                                                                                                                                                                                                                                                                                                                  | Bottle is not with me right now                                                                                                 |                                                                                                                                                                                                                                                                                                                                                                                                                                                                                                                         |   |                            |                                 |   |                            |                    |   |                            |                     |   |                            |                   |   |                            |       |   |                            |            |
| 2  | why_script_unavailable__2                                                                                                                                                                                                                                                                                                                                                                                  | Disposed of script                                                                                                              |                                                                                                                                                                                                                                                                                                                                                                                                                                                                                                                         |   |                            |                                 |   |                            |                    |   |                            |                     |   |                            |                   |   |                            |       |   |                            |            |
| 3  | why_script_unavailable__3                                                                                                                                                                                                                                                                                                                                                                                  | Finished the script                                                                                                             |                                                                                                                                                                                                                                                                                                                                                                                                                                                                                                                         |   |                            |                                 |   |                            |                    |   |                            |                     |   |                            |                   |   |                            |       |   |                            |            |
| 4  | why_script_unavailable__4                                                                                                                                                                                                                                                                                                                                                                                  | Refused to answer                                                                                                               |                                                                                                                                                                                                                                                                                                                                                                                                                                                                                                                         |   |                            |                                 |   |                            |                    |   |                            |                     |   |                            |                   |   |                            |       |   |                            |            |
| 5  | why_script_unavailable__5                                                                                                                                                                                                                                                                                                                                                                                  | Other                                                                                                                           |                                                                                                                                                                                                                                                                                                                                                                                                                                                                                                                         |   |                            |                                 |   |                            |                    |   |                            |                     |   |                            |                   |   |                            |       |   |                            |            |
| 35 | other_unavailable<br>Show the field ONLY if:<br>[why_script_unavailable(5)] = '1'                                                                                                                                                                                                                                                                                                                          | If other: Please specify                                                                                                        | text                                                                                                                                                                                                                                                                                                                                                                                                                                                                                                                    |   |                            |                                 |   |                            |                    |   |                            |                     |   |                            |                   |   |                            |       |   |                            |            |
| 36 | unavailable_script_type<br>Show the field ONLY if:<br>[why_script_unavailable(2)] = '1' or [why_script_unavailable(3)] = '1' or [why_script_unavailable(4)] = '1' or [why_script_unavailable(5)] = '1' or [plan_to_refill_opioids] = '2' or [plan_to_refill_opioids] = '3' or [plan_to_refill_opioids] = '4' or [call_back_na] = '2' or [why_script_unavailable(1)] = '1' and [why_rx_not_filled(6)] = '0' | Can you remember the type (name) of the opioid prescribed?                                                                      | checkbox<br><table border="1"> <tr> <td>1</td> <td>unavailable_script_type__1</td> <td>Hydrocodone</td> </tr> <tr> <td>2</td> <td>unavailable_script_type__2</td> <td>Oxycodone</td> </tr> <tr> <td>3</td> <td>unavailable_script_type__3</td> <td>Percocet</td> </tr> <tr> <td>4</td> <td>unavailable_script_type__4</td> <td>Hydromorphone</td> </tr> <tr> <td>5</td> <td>unavailable_script_type__5</td> <td>Other</td> </tr> <tr> <td>6</td> <td>unavailable_script_type__6</td> <td>Don't know</td> </tr> </table> | 1 | unavailable_script_type__1 | Hydrocodone                     | 2 | unavailable_script_type__2 | Oxycodone          | 3 | unavailable_script_type__3 | Percocet            | 4 | unavailable_script_type__4 | Hydromorphone     | 5 | unavailable_script_type__5 | Other | 6 | unavailable_script_type__6 | Don't know |
| 1  | unavailable_script_type__1                                                                                                                                                                                                                                                                                                                                                                                 | Hydrocodone                                                                                                                     |                                                                                                                                                                                                                                                                                                                                                                                                                                                                                                                         |   |                            |                                 |   |                            |                    |   |                            |                     |   |                            |                   |   |                            |       |   |                            |            |
| 2  | unavailable_script_type__2                                                                                                                                                                                                                                                                                                                                                                                 | Oxycodone                                                                                                                       |                                                                                                                                                                                                                                                                                                                                                                                                                                                                                                                         |   |                            |                                 |   |                            |                    |   |                            |                     |   |                            |                   |   |                            |       |   |                            |            |
| 3  | unavailable_script_type__3                                                                                                                                                                                                                                                                                                                                                                                 | Percocet                                                                                                                        |                                                                                                                                                                                                                                                                                                                                                                                                                                                                                                                         |   |                            |                                 |   |                            |                    |   |                            |                     |   |                            |                   |   |                            |       |   |                            |            |
| 4  | unavailable_script_type__4                                                                                                                                                                                                                                                                                                                                                                                 | Hydromorphone                                                                                                                   |                                                                                                                                                                                                                                                                                                                                                                                                                                                                                                                         |   |                            |                                 |   |                            |                    |   |                            |                     |   |                            |                   |   |                            |       |   |                            |            |
| 5  | unavailable_script_type__5                                                                                                                                                                                                                                                                                                                                                                                 | Other                                                                                                                           |                                                                                                                                                                                                                                                                                                                                                                                                                                                                                                                         |   |                            |                                 |   |                            |                    |   |                            |                     |   |                            |                   |   |                            |       |   |                            |            |
| 6  | unavailable_script_type__6                                                                                                                                                                                                                                                                                                                                                                                 | Don't know                                                                                                                      |                                                                                                                                                                                                                                                                                                                                                                                                                                                                                                                         |   |                            |                                 |   |                            |                    |   |                            |                     |   |                            |                   |   |                            |       |   |                            |            |
| 37 | if_other_med_memory<br>Show the field ONLY if:<br>[unavailable_script_type(5)] = '1'                                                                                                                                                                                                                                                                                                                       | If other: Please specify                                                                                                        | text                                                                                                                                                                                                                                                                                                                                                                                                                                                                                                                    |   |                            |                                 |   |                            |                    |   |                            |                     |   |                            |                   |   |                            |       |   |                            |            |
| 38 | na_opioid_strength<br>Show the field ONLY if:<br>[why_script_unavailable(2)] = '1' or [why_script_unavailable(3)] = '1' or [why_script_unavailable(4)] = '1' or [why_script_unavailable(5)] = '1' or [plan_to_refill_opioids] = '2' or [plan_to_refill_opioids] = '3' or [plan_to_refill_opioids] = '4' or [call_back_na] = '2' or [why_script_unavailable(1)] = '1'                                       | Can you remember the strength of the opioid prescription (in mg)?<br><i>Write "NA" if patient doesn't remember</i>              | text                                                                                                                                                                                                                                                                                                                                                                                                                                                                                                                    |   |                            |                                 |   |                            |                    |   |                            |                     |   |                            |                   |   |                            |       |   |                            |            |
| 39 | na_tablet_number<br>Show the field ONLY if:<br>[why_script_unavailable(2)] = '1' or [why_script_unavailable(3)] = '1' or [why_script_unavailable(4)] = '1' or [why_script_unavailable(5)] = '1' or [plan_to_refill_opioids] = '2' or [plan_to_refill_opioids] = '3' or [plan_to_refill_opioids] = '4' or                                                                                                   | Can you remember how many tablets were dispensed for your opioid prescription?<br><i>Write "NA" if patient doesn't remember</i> | text                                                                                                                                                                                                                                                                                                                                                                                                                                                                                                                    |   |                            |                                 |   |                            |                    |   |                            |                     |   |                            |                   |   |                            |       |   |                            |            |

Bateman BT, Cole NM, Maeda A, Burns SM, Houle TT, Huybrechts KF, et al. Patterns of opioid prescription and use after cesarean delivery. *Obstet Gynecol* 2017; 130.

The authors provided this information as a supplement to their article.

©2017 American College of Obstetricians and Gynecologists.

|    |                                                                                                                                                                                                                                                                                |                                                                                                                    |                                                                                                                                                                                                                                                                                                                                                                                                                                                                                                                                                                                                                                                                                                |   |                           |                   |    |                           |                    |   |                           |                 |                   |                           |                               |   |                           |            |   |                       |                     |   |                       |                   |   |                       |       |
|----|--------------------------------------------------------------------------------------------------------------------------------------------------------------------------------------------------------------------------------------------------------------------------------|--------------------------------------------------------------------------------------------------------------------|------------------------------------------------------------------------------------------------------------------------------------------------------------------------------------------------------------------------------------------------------------------------------------------------------------------------------------------------------------------------------------------------------------------------------------------------------------------------------------------------------------------------------------------------------------------------------------------------------------------------------------------------------------------------------------------------|---|---------------------------|-------------------|----|---------------------------|--------------------|---|---------------------------|-----------------|-------------------|---------------------------|-------------------------------|---|---------------------------|------------|---|-----------------------|---------------------|---|-----------------------|-------------------|---|-----------------------|-------|
|    | [call_back_na] = '2' or<br>[why_script_unavailable(1)] = '1'                                                                                                                                                                                                                   |                                                                                                                    |                                                                                                                                                                                                                                                                                                                                                                                                                                                                                                                                                                                                                                                                                                |   |                           |                   |    |                           |                    |   |                           |                 |                   |                           |                               |   |                           |            |   |                       |                     |   |                       |                   |   |                       |       |
| 40 | pills_taken_diposed<br>Show the field ONLY if:<br>[why_script_unavailable(2)] = '1'<br>or [why_script_unavailable(1)] = '1' or<br>[why_script_unavailable(5)] = '1'<br>or [why_script_unavailable(4)] = '1' or<br>[why_script_unavailable(1)] = '1'<br>or [call_back_na] = '2' | Can you estimate the number of pills you have/had leftover?<br><i>Write "NA" if patient doesn't remember</i>       | text                                                                                                                                                                                                                                                                                                                                                                                                                                                                                                                                                                                                                                                                                           |   |                           |                   |    |                           |                    |   |                           |                 |                   |                           |                               |   |                           |            |   |                       |                     |   |                       |                   |   |                       |       |
| 41 | number_pills_disposed<br>Show the field ONLY if:<br>[why_script_unavailable(2)] = '1'                                                                                                                                                                                          | Can you estimate the number of pills you threw out?<br><i>Write "NA" if patient doesn't remember</i>               | text                                                                                                                                                                                                                                                                                                                                                                                                                                                                                                                                                                                                                                                                                           |   |                           |                   |    |                           |                    |   |                           |                 |                   |                           |                               |   |                           |            |   |                       |                     |   |                       |                   |   |                       |       |
| 42 | how_pills_disposed<br>Show the field ONLY if:<br>[why_script_unavailable(2)] = '1'                                                                                                                                                                                             | How did you dispose of your pills?                                                                                 | checkbox <table border="1"> <tr> <td>1</td> <td>how_pills_disposed__1</td> <td>Flush down toilet</td> </tr> <tr> <td>2</td> <td>how_pills_disposed__2</td> <td>Throw out in trash</td> </tr> <tr> <td>3</td> <td>how_pills_disposed__3</td> <td>Stash somewhere</td> </tr> <tr> <td>4</td> <td>how_pills_disposed__4</td> <td>Bring to pill drop-off center</td> </tr> <tr> <td>5</td> <td>how_pills_disposed__5</td> <td>Lost track</td> </tr> <tr> <td>6</td> <td>how_pills_disposed__6</td> <td>Don't remember/know</td> </tr> <tr> <td>7</td> <td>how_pills_disposed__7</td> <td>Refused to answer</td> </tr> <tr> <td>8</td> <td>how_pills_disposed__8</td> <td>Other</td> </tr> </table> | 1 | how_pills_disposed__1     | Flush down toilet | 2  | how_pills_disposed__2     | Throw out in trash | 3 | how_pills_disposed__3     | Stash somewhere | 4                 | how_pills_disposed__4     | Bring to pill drop-off center | 5 | how_pills_disposed__5     | Lost track | 6 | how_pills_disposed__6 | Don't remember/know | 7 | how_pills_disposed__7 | Refused to answer | 8 | how_pills_disposed__8 | Other |
| 1  | how_pills_disposed__1                                                                                                                                                                                                                                                          | Flush down toilet                                                                                                  |                                                                                                                                                                                                                                                                                                                                                                                                                                                                                                                                                                                                                                                                                                |   |                           |                   |    |                           |                    |   |                           |                 |                   |                           |                               |   |                           |            |   |                       |                     |   |                       |                   |   |                       |       |
| 2  | how_pills_disposed__2                                                                                                                                                                                                                                                          | Throw out in trash                                                                                                 |                                                                                                                                                                                                                                                                                                                                                                                                                                                                                                                                                                                                                                                                                                |   |                           |                   |    |                           |                    |   |                           |                 |                   |                           |                               |   |                           |            |   |                       |                     |   |                       |                   |   |                       |       |
| 3  | how_pills_disposed__3                                                                                                                                                                                                                                                          | Stash somewhere                                                                                                    |                                                                                                                                                                                                                                                                                                                                                                                                                                                                                                                                                                                                                                                                                                |   |                           |                   |    |                           |                    |   |                           |                 |                   |                           |                               |   |                           |            |   |                       |                     |   |                       |                   |   |                       |       |
| 4  | how_pills_disposed__4                                                                                                                                                                                                                                                          | Bring to pill drop-off center                                                                                      |                                                                                                                                                                                                                                                                                                                                                                                                                                                                                                                                                                                                                                                                                                |   |                           |                   |    |                           |                    |   |                           |                 |                   |                           |                               |   |                           |            |   |                       |                     |   |                       |                   |   |                       |       |
| 5  | how_pills_disposed__5                                                                                                                                                                                                                                                          | Lost track                                                                                                         |                                                                                                                                                                                                                                                                                                                                                                                                                                                                                                                                                                                                                                                                                                |   |                           |                   |    |                           |                    |   |                           |                 |                   |                           |                               |   |                           |            |   |                       |                     |   |                       |                   |   |                       |       |
| 6  | how_pills_disposed__6                                                                                                                                                                                                                                                          | Don't remember/know                                                                                                |                                                                                                                                                                                                                                                                                                                                                                                                                                                                                                                                                                                                                                                                                                |   |                           |                   |    |                           |                    |   |                           |                 |                   |                           |                               |   |                           |            |   |                       |                     |   |                       |                   |   |                       |       |
| 7  | how_pills_disposed__7                                                                                                                                                                                                                                                          | Refused to answer                                                                                                  |                                                                                                                                                                                                                                                                                                                                                                                                                                                                                                                                                                                                                                                                                                |   |                           |                   |    |                           |                    |   |                           |                 |                   |                           |                               |   |                           |            |   |                       |                     |   |                       |                   |   |                       |       |
| 8  | how_pills_disposed__8                                                                                                                                                                                                                                                          | Other                                                                                                              |                                                                                                                                                                                                                                                                                                                                                                                                                                                                                                                                                                                                                                                                                                |   |                           |                   |    |                           |                    |   |                           |                 |                   |                           |                               |   |                           |            |   |                       |                     |   |                       |                   |   |                       |       |
| 43 | any_refills_opioids                                                                                                                                                                                                                                                            | Did you get any refills for these opioid pain medications (and list names: oxycodone, percocet, hydrocodone, etc)? | radio, Required <table border="1"> <tr> <td>1</td> <td>Yes</td> </tr> <tr> <td>2</td> <td>No</td> </tr> <tr> <td>3</td> <td>Don't know</td> </tr> <tr> <td>4</td> <td>Not applicable</td> </tr> <tr> <td>5</td> <td>Refused to answer</td> </tr> </table>                                                                                                                                                                                                                                                                                                                                                                                                                                      | 1 | Yes                       | 2                 | No | 3                         | Don't know         | 4 | Not applicable            | 5               | Refused to answer |                           |                               |   |                           |            |   |                       |                     |   |                       |                   |   |                       |       |
| 1  | Yes                                                                                                                                                                                                                                                                            |                                                                                                                    |                                                                                                                                                                                                                                                                                                                                                                                                                                                                                                                                                                                                                                                                                                |   |                           |                   |    |                           |                    |   |                           |                 |                   |                           |                               |   |                           |            |   |                       |                     |   |                       |                   |   |                       |       |
| 2  | No                                                                                                                                                                                                                                                                             |                                                                                                                    |                                                                                                                                                                                                                                                                                                                                                                                                                                                                                                                                                                                                                                                                                                |   |                           |                   |    |                           |                    |   |                           |                 |                   |                           |                               |   |                           |            |   |                       |                     |   |                       |                   |   |                       |       |
| 3  | Don't know                                                                                                                                                                                                                                                                     |                                                                                                                    |                                                                                                                                                                                                                                                                                                                                                                                                                                                                                                                                                                                                                                                                                                |   |                           |                   |    |                           |                    |   |                           |                 |                   |                           |                               |   |                           |            |   |                       |                     |   |                       |                   |   |                       |       |
| 4  | Not applicable                                                                                                                                                                                                                                                                 |                                                                                                                    |                                                                                                                                                                                                                                                                                                                                                                                                                                                                                                                                                                                                                                                                                                |   |                           |                   |    |                           |                    |   |                           |                 |                   |                           |                               |   |                           |            |   |                       |                     |   |                       |                   |   |                       |       |
| 5  | Refused to answer                                                                                                                                                                                                                                                              |                                                                                                                    |                                                                                                                                                                                                                                                                                                                                                                                                                                                                                                                                                                                                                                                                                                |   |                           |                   |    |                           |                    |   |                           |                 |                   |                           |                               |   |                           |            |   |                       |                     |   |                       |                   |   |                       |       |
| 44 | which_opioids_refilled<br>Show the field ONLY if:<br>[any_refills_opioids] = '1'                                                                                                                                                                                               | If yes: Which ones?                                                                                                | checkbox <table border="1"> <tr> <td>1</td> <td>which_opioids_refilled__1</td> <td>Hydrocodone</td> </tr> <tr> <td>2</td> <td>which_opioids_refilled__2</td> <td>Oxycodone</td> </tr> <tr> <td>3</td> <td>which_opioids_refilled__3</td> <td>Percocet</td> </tr> <tr> <td>4</td> <td>which_opioids_refilled__4</td> <td>Hydromorphone</td> </tr> <tr> <td>5</td> <td>which_opioids_refilled__5</td> <td>Other</td> </tr> </table>                                                                                                                                                                                                                                                              | 1 | which_opioids_refilled__1 | Hydrocodone       | 2  | which_opioids_refilled__2 | Oxycodone          | 3 | which_opioids_refilled__3 | Percocet        | 4                 | which_opioids_refilled__4 | Hydromorphone                 | 5 | which_opioids_refilled__5 | Other      |   |                       |                     |   |                       |                   |   |                       |       |
| 1  | which_opioids_refilled__1                                                                                                                                                                                                                                                      | Hydrocodone                                                                                                        |                                                                                                                                                                                                                                                                                                                                                                                                                                                                                                                                                                                                                                                                                                |   |                           |                   |    |                           |                    |   |                           |                 |                   |                           |                               |   |                           |            |   |                       |                     |   |                       |                   |   |                       |       |
| 2  | which_opioids_refilled__2                                                                                                                                                                                                                                                      | Oxycodone                                                                                                          |                                                                                                                                                                                                                                                                                                                                                                                                                                                                                                                                                                                                                                                                                                |   |                           |                   |    |                           |                    |   |                           |                 |                   |                           |                               |   |                           |            |   |                       |                     |   |                       |                   |   |                       |       |
| 3  | which_opioids_refilled__3                                                                                                                                                                                                                                                      | Percocet                                                                                                           |                                                                                                                                                                                                                                                                                                                                                                                                                                                                                                                                                                                                                                                                                                |   |                           |                   |    |                           |                    |   |                           |                 |                   |                           |                               |   |                           |            |   |                       |                     |   |                       |                   |   |                       |       |
| 4  | which_opioids_refilled__4                                                                                                                                                                                                                                                      | Hydromorphone                                                                                                      |                                                                                                                                                                                                                                                                                                                                                                                                                                                                                                                                                                                                                                                                                                |   |                           |                   |    |                           |                    |   |                           |                 |                   |                           |                               |   |                           |            |   |                       |                     |   |                       |                   |   |                       |       |
| 5  | which_opioids_refilled__5                                                                                                                                                                                                                                                      | Other                                                                                                              |                                                                                                                                                                                                                                                                                                                                                                                                                                                                                                                                                                                                                                                                                                |   |                           |                   |    |                           |                    |   |                           |                 |                   |                           |                               |   |                           |            |   |                       |                     |   |                       |                   |   |                       |       |
| 45 | plan_to_refill_opioids<br>Show the field ONLY if:<br>[why_script_unavailable(3)] = '1'                                                                                                                                                                                         | Do you plan to refill this opioid prescription?                                                                    | radio <table border="1"> <tr> <td>1</td> <td>Yes</td> </tr> <tr> <td>2</td> <td>No</td> </tr> </table>                                                                                                                                                                                                                                                                                                                                                                                                                                                                                                                                                                                         | 1 | Yes                       | 2                 | No |                           |                    |   |                           |                 |                   |                           |                               |   |                           |            |   |                       |                     |   |                       |                   |   |                       |       |
| 1  | Yes                                                                                                                                                                                                                                                                            |                                                                                                                    |                                                                                                                                                                                                                                                                                                                                                                                                                                                                                                                                                                                                                                                                                                |   |                           |                   |    |                           |                    |   |                           |                 |                   |                           |                               |   |                           |            |   |                       |                     |   |                       |                   |   |                       |       |
| 2  | No                                                                                                                                                                                                                                                                             |                                                                                                                    |                                                                                                                                                                                                                                                                                                                                                                                                                                                                                                                                                                                                                                                                                                |   |                           |                   |    |                           |                    |   |                           |                 |                   |                           |                               |   |                           |            |   |                       |                     |   |                       |                   |   |                       |       |

Bateman BT, Cole NM, Maeda A, Burns SM, Houle TT, Huybrechts KF, et al. Patterns of opioid prescription and use after cesarean delivery. *Obstet Gynecol* 2017; 130.

The authors provided this information as a supplement to their article.

©2017 American College of Obstetricians and Gynecologists.

|    |                                                                                     |                                                                                                                                    |                                                                                                                                                                                                                                                                                                                                                                            |   |                |   |                   |   |                    |   |                       |   |                |   |                   |   |                |
|----|-------------------------------------------------------------------------------------|------------------------------------------------------------------------------------------------------------------------------------|----------------------------------------------------------------------------------------------------------------------------------------------------------------------------------------------------------------------------------------------------------------------------------------------------------------------------------------------------------------------------|---|----------------|---|-------------------|---|--------------------|---|-----------------------|---|----------------|---|-------------------|---|----------------|
|    |                                                                                     |                                                                                                                                    | <table border="1"> <tr> <td>3</td> <td>Don't know</td> </tr> <tr> <td>4</td> <td>Refused to answer</td> </tr> </table>                                                                                                                                                                                                                                                     | 3 | Don't know     | 4 | Refused to answer |   |                    |   |                       |   |                |   |                   |   |                |
| 3  | Don't know                                                                          |                                                                                                                                    |                                                                                                                                                                                                                                                                                                                                                                            |   |                |   |                   |   |                    |   |                       |   |                |   |                   |   |                |
| 4  | Refused to answer                                                                   |                                                                                                                                    |                                                                                                                                                                                                                                                                                                                                                                            |   |                |   |                   |   |                    |   |                       |   |                |   |                   |   |                |
| 46 | bottle_na_call_back_info<br>Show the field ONLY if:<br>[call_back_na] = '1'         | If calling back, list information here about call back times, time lapsed, etc. for resuming the survey:                           | notes                                                                                                                                                                                                                                                                                                                                                                      |   |                |   |                   |   |                    |   |                       |   |                |   |                   |   |                |
| 47 | when_stopped_meds<br>Show the field ONLY if:<br>[still_taking_opioids] = '2'        | How many days after discharge did you stop taking these medications?<br><i>Write "NA" if patient never took opioid medications</i> | text, Required                                                                                                                                                                                                                                                                                                                                                             |   |                |   |                   |   |                    |   |                       |   |                |   |                   |   |                |
| 48 | opioid_refill_other<br>Show the field ONLY if:<br>[which_opioids_refilled(5)] = '1' | If other: Please specify                                                                                                           | text                                                                                                                                                                                                                                                                                                                                                                       |   |                |   |                   |   |                    |   |                       |   |                |   |                   |   |                |
| 49 | rate_opioid_quantity                                                                | Given your experience, did you think the supply of the opioid initial prescription was...                                          | radio, Required <table border="1"> <tr> <td>1</td> <td>Too little</td> </tr> <tr> <td>2</td> <td>Too much</td> </tr> <tr> <td>3</td> <td>Just right</td> </tr> <tr> <td>4</td> <td>Not applicable</td> </tr> </table>                                                                                                                                                      | 1 | Too little     | 2 | Too much          | 3 | Just right         | 4 | Not applicable        |   |                |   |                   |   |                |
| 1  | Too little                                                                          |                                                                                                                                    |                                                                                                                                                                                                                                                                                                                                                                            |   |                |   |                   |   |                    |   |                       |   |                |   |                   |   |                |
| 2  | Too much                                                                            |                                                                                                                                    |                                                                                                                                                                                                                                                                                                                                                                            |   |                |   |                   |   |                    |   |                       |   |                |   |                   |   |                |
| 3  | Just right                                                                          |                                                                                                                                    |                                                                                                                                                                                                                                                                                                                                                                            |   |                |   |                   |   |                    |   |                       |   |                |   |                   |   |                |
| 4  | Not applicable                                                                      |                                                                                                                                    |                                                                                                                                                                                                                                                                                                                                                                            |   |                |   |                   |   |                    |   |                       |   |                |   |                   |   |                |
| 50 | how_often_take_opioids                                                              | While on each medication, on average how often did you take them per day?                                                          | radio, Required <table border="1"> <tr> <td>1</td> <td>Once a day</td> </tr> <tr> <td>2</td> <td>2-3 times a day</td> </tr> <tr> <td>3</td> <td>4-6 times a day</td> </tr> <tr> <td>4</td> <td>&gt;6 times a day</td> </tr> <tr> <td>5</td> <td>Not applicable</td> </tr> </table>                                                                                         | 1 | Once a day     | 2 | 2-3 times a day   | 3 | 4-6 times a day    | 4 | >6 times a day        | 5 | Not applicable |   |                   |   |                |
| 1  | Once a day                                                                          |                                                                                                                                    |                                                                                                                                                                                                                                                                                                                                                                            |   |                |   |                   |   |                    |   |                       |   |                |   |                   |   |                |
| 2  | 2-3 times a day                                                                     |                                                                                                                                    |                                                                                                                                                                                                                                                                                                                                                                            |   |                |   |                   |   |                    |   |                       |   |                |   |                   |   |                |
| 3  | 4-6 times a day                                                                     |                                                                                                                                    |                                                                                                                                                                                                                                                                                                                                                                            |   |                |   |                   |   |                    |   |                       |   |                |   |                   |   |                |
| 4  | >6 times a day                                                                      |                                                                                                                                    |                                                                                                                                                                                                                                                                                                                                                                            |   |                |   |                   |   |                    |   |                       |   |                |   |                   |   |                |
| 5  | Not applicable                                                                      |                                                                                                                                    |                                                                                                                                                                                                                                                                                                                                                                            |   |                |   |                   |   |                    |   |                       |   |                |   |                   |   |                |
| 51 | opioids_change_frequency                                                            | Did this frequency change over time (estimate by day)?<br><i>Write "NA" if patient never took opioid meds</i>                      | notes                                                                                                                                                                                                                                                                                                                                                                      |   |                |   |                   |   |                    |   |                       |   |                |   |                   |   |                |
| 52 | rate_pain_relief                                                                    | Did you get adequate pain relief, on a scale of:                                                                                   | radio <table border="1"> <tr> <td>1</td> <td>Very satisfied</td> </tr> <tr> <td>2</td> <td>Satisfied</td> </tr> <tr> <td>3</td> <td>Slightly satisfied</td> </tr> <tr> <td>4</td> <td>Slightly dissatisfied</td> </tr> <tr> <td>5</td> <td>Dissatisfied</td> </tr> <tr> <td>6</td> <td>Very dissatisfied</td> </tr> <tr> <td>7</td> <td>Not applicable</td> </tr> </table> | 1 | Very satisfied | 2 | Satisfied         | 3 | Slightly satisfied | 4 | Slightly dissatisfied | 5 | Dissatisfied   | 6 | Very dissatisfied | 7 | Not applicable |
| 1  | Very satisfied                                                                      |                                                                                                                                    |                                                                                                                                                                                                                                                                                                                                                                            |   |                |   |                   |   |                    |   |                       |   |                |   |                   |   |                |
| 2  | Satisfied                                                                           |                                                                                                                                    |                                                                                                                                                                                                                                                                                                                                                                            |   |                |   |                   |   |                    |   |                       |   |                |   |                   |   |                |
| 3  | Slightly satisfied                                                                  |                                                                                                                                    |                                                                                                                                                                                                                                                                                                                                                                            |   |                |   |                   |   |                    |   |                       |   |                |   |                   |   |                |
| 4  | Slightly dissatisfied                                                               |                                                                                                                                    |                                                                                                                                                                                                                                                                                                                                                                            |   |                |   |                   |   |                    |   |                       |   |                |   |                   |   |                |
| 5  | Dissatisfied                                                                        |                                                                                                                                    |                                                                                                                                                                                                                                                                                                                                                                            |   |                |   |                   |   |                    |   |                       |   |                |   |                   |   |                |
| 6  | Very dissatisfied                                                                   |                                                                                                                                    |                                                                                                                                                                                                                                                                                                                                                                            |   |                |   |                   |   |                    |   |                       |   |                |   |                   |   |                |
| 7  | Not applicable                                                                      |                                                                                                                                    |                                                                                                                                                                                                                                                                                                                                                                            |   |                |   |                   |   |                    |   |                       |   |                |   |                   |   |                |
| 53 | any_med_side_effects                                                                | Did you have any side effects from the pain medications?                                                                           | radio, Required <table border="1"> <tr> <td>1</td> <td>Yes</td> </tr> </table>                                                                                                                                                                                                                                                                                             | 1 | Yes            |   |                   |   |                    |   |                       |   |                |   |                   |   |                |
| 1  | Yes                                                                                 |                                                                                                                                    |                                                                                                                                                                                                                                                                                                                                                                            |   |                |   |                   |   |                    |   |                       |   |                |   |                   |   |                |



|    |                                                                                         |                                                                                  |                                                                                                                                                                                                                                                                                                                                                                                                                                                                                                                                                                                                                                                                                                                                                                                                                                                                  |   |                              |             |            |                              |                 |   |                              |                      |                   |                              |                  |   |                              |           |   |                              |                  |   |                      |                          |   |                      |         |   |                      |                     |    |                       |             |    |                       |       |
|----|-----------------------------------------------------------------------------------------|----------------------------------------------------------------------------------|------------------------------------------------------------------------------------------------------------------------------------------------------------------------------------------------------------------------------------------------------------------------------------------------------------------------------------------------------------------------------------------------------------------------------------------------------------------------------------------------------------------------------------------------------------------------------------------------------------------------------------------------------------------------------------------------------------------------------------------------------------------------------------------------------------------------------------------------------------------|---|------------------------------|-------------|------------|------------------------------|-----------------|---|------------------------------|----------------------|-------------------|------------------------------|------------------|---|------------------------------|-----------|---|------------------------------|------------------|---|----------------------|--------------------------|---|----------------------|---------|---|----------------------|---------------------|----|-----------------------|-------------|----|-----------------------|-------|
|    |                                                                                         |                                                                                  | <table border="1"> <tr><td>2</td><td>No</td></tr> <tr><td>3</td><td>Don't know</td></tr> <tr><td>4</td><td>Not applicable</td></tr> <tr><td>5</td><td>Refused to answer</td></tr> </table>                                                                                                                                                                                                                                                                                                                                                                                                                                                                                                                                                                                                                                                                       | 2 | No                           | 3           | Don't know | 4                            | Not applicable  | 5 | Refused to answer            |                      |                   |                              |                  |   |                              |           |   |                              |                  |   |                      |                          |   |                      |         |   |                      |                     |    |                       |             |    |                       |       |
| 2  | No                                                                                      |                                                                                  |                                                                                                                                                                                                                                                                                                                                                                                                                                                                                                                                                                                                                                                                                                                                                                                                                                                                  |   |                              |             |            |                              |                 |   |                              |                      |                   |                              |                  |   |                              |           |   |                              |                  |   |                      |                          |   |                      |         |   |                      |                     |    |                       |             |    |                       |       |
| 3  | Don't know                                                                              |                                                                                  |                                                                                                                                                                                                                                                                                                                                                                                                                                                                                                                                                                                                                                                                                                                                                                                                                                                                  |   |                              |             |            |                              |                 |   |                              |                      |                   |                              |                  |   |                              |           |   |                              |                  |   |                      |                          |   |                      |         |   |                      |                     |    |                       |             |    |                       |       |
| 4  | Not applicable                                                                          |                                                                                  |                                                                                                                                                                                                                                                                                                                                                                                                                                                                                                                                                                                                                                                                                                                                                                                                                                                                  |   |                              |             |            |                              |                 |   |                              |                      |                   |                              |                  |   |                              |           |   |                              |                  |   |                      |                          |   |                      |         |   |                      |                     |    |                       |             |    |                       |       |
| 5  | Refused to answer                                                                       |                                                                                  |                                                                                                                                                                                                                                                                                                                                                                                                                                                                                                                                                                                                                                                                                                                                                                                                                                                                  |   |                              |             |            |                              |                 |   |                              |                      |                   |                              |                  |   |                              |           |   |                              |                  |   |                      |                          |   |                      |         |   |                      |                     |    |                       |             |    |                       |       |
| 54 | list_side_effects<br>Show the field ONLY if:<br>[any_med_side_effects] = '1'            | If yes: Please check all that apply                                              | checkbox, Required<br><table border="1"> <tr><td>1</td><td>list_side_effects__1</td><td>Drowsiness</td></tr> <tr><td>2</td><td>list_side_effects__2</td><td>Nausea/Vomiting</td></tr> <tr><td>3</td><td>list_side_effects__3</td><td>Abdominal discomfort</td></tr> <tr><td>4</td><td>list_side_effects__4</td><td>Constipation</td></tr> <tr><td>5</td><td>list_side_effects__5</td><td>Dizziness</td></tr> <tr><td>6</td><td>list_side_effects__6</td><td>Confusion</td></tr> <tr><td>7</td><td>list_side_effects__7</td><td>Insomnia/Sleeping issues</td></tr> <tr><td>8</td><td>list_side_effects__8</td><td>Itching</td></tr> <tr><td>9</td><td>list_side_effects__9</td><td>Difficult urination</td></tr> <tr><td>10</td><td>list_side_effects__10</td><td>Mood swings</td></tr> <tr><td>11</td><td>list_side_effects__11</td><td>Other</td></tr> </table> | 1 | list_side_effects__1         | Drowsiness  | 2          | list_side_effects__2         | Nausea/Vomiting | 3 | list_side_effects__3         | Abdominal discomfort | 4                 | list_side_effects__4         | Constipation     | 5 | list_side_effects__5         | Dizziness | 6 | list_side_effects__6         | Confusion        | 7 | list_side_effects__7 | Insomnia/Sleeping issues | 8 | list_side_effects__8 | Itching | 9 | list_side_effects__9 | Difficult urination | 10 | list_side_effects__10 | Mood swings | 11 | list_side_effects__11 | Other |
| 1  | list_side_effects__1                                                                    | Drowsiness                                                                       |                                                                                                                                                                                                                                                                                                                                                                                                                                                                                                                                                                                                                                                                                                                                                                                                                                                                  |   |                              |             |            |                              |                 |   |                              |                      |                   |                              |                  |   |                              |           |   |                              |                  |   |                      |                          |   |                      |         |   |                      |                     |    |                       |             |    |                       |       |
| 2  | list_side_effects__2                                                                    | Nausea/Vomiting                                                                  |                                                                                                                                                                                                                                                                                                                                                                                                                                                                                                                                                                                                                                                                                                                                                                                                                                                                  |   |                              |             |            |                              |                 |   |                              |                      |                   |                              |                  |   |                              |           |   |                              |                  |   |                      |                          |   |                      |         |   |                      |                     |    |                       |             |    |                       |       |
| 3  | list_side_effects__3                                                                    | Abdominal discomfort                                                             |                                                                                                                                                                                                                                                                                                                                                                                                                                                                                                                                                                                                                                                                                                                                                                                                                                                                  |   |                              |             |            |                              |                 |   |                              |                      |                   |                              |                  |   |                              |           |   |                              |                  |   |                      |                          |   |                      |         |   |                      |                     |    |                       |             |    |                       |       |
| 4  | list_side_effects__4                                                                    | Constipation                                                                     |                                                                                                                                                                                                                                                                                                                                                                                                                                                                                                                                                                                                                                                                                                                                                                                                                                                                  |   |                              |             |            |                              |                 |   |                              |                      |                   |                              |                  |   |                              |           |   |                              |                  |   |                      |                          |   |                      |         |   |                      |                     |    |                       |             |    |                       |       |
| 5  | list_side_effects__5                                                                    | Dizziness                                                                        |                                                                                                                                                                                                                                                                                                                                                                                                                                                                                                                                                                                                                                                                                                                                                                                                                                                                  |   |                              |             |            |                              |                 |   |                              |                      |                   |                              |                  |   |                              |           |   |                              |                  |   |                      |                          |   |                      |         |   |                      |                     |    |                       |             |    |                       |       |
| 6  | list_side_effects__6                                                                    | Confusion                                                                        |                                                                                                                                                                                                                                                                                                                                                                                                                                                                                                                                                                                                                                                                                                                                                                                                                                                                  |   |                              |             |            |                              |                 |   |                              |                      |                   |                              |                  |   |                              |           |   |                              |                  |   |                      |                          |   |                      |         |   |                      |                     |    |                       |             |    |                       |       |
| 7  | list_side_effects__7                                                                    | Insomnia/Sleeping issues                                                         |                                                                                                                                                                                                                                                                                                                                                                                                                                                                                                                                                                                                                                                                                                                                                                                                                                                                  |   |                              |             |            |                              |                 |   |                              |                      |                   |                              |                  |   |                              |           |   |                              |                  |   |                      |                          |   |                      |         |   |                      |                     |    |                       |             |    |                       |       |
| 8  | list_side_effects__8                                                                    | Itching                                                                          |                                                                                                                                                                                                                                                                                                                                                                                                                                                                                                                                                                                                                                                                                                                                                                                                                                                                  |   |                              |             |            |                              |                 |   |                              |                      |                   |                              |                  |   |                              |           |   |                              |                  |   |                      |                          |   |                      |         |   |                      |                     |    |                       |             |    |                       |       |
| 9  | list_side_effects__9                                                                    | Difficult urination                                                              |                                                                                                                                                                                                                                                                                                                                                                                                                                                                                                                                                                                                                                                                                                                                                                                                                                                                  |   |                              |             |            |                              |                 |   |                              |                      |                   |                              |                  |   |                              |           |   |                              |                  |   |                      |                          |   |                      |         |   |                      |                     |    |                       |             |    |                       |       |
| 10 | list_side_effects__10                                                                   | Mood swings                                                                      |                                                                                                                                                                                                                                                                                                                                                                                                                                                                                                                                                                                                                                                                                                                                                                                                                                                                  |   |                              |             |            |                              |                 |   |                              |                      |                   |                              |                  |   |                              |           |   |                              |                  |   |                      |                          |   |                      |         |   |                      |                     |    |                       |             |    |                       |       |
| 11 | list_side_effects__11                                                                   | Other                                                                            |                                                                                                                                                                                                                                                                                                                                                                                                                                                                                                                                                                                                                                                                                                                                                                                                                                                                  |   |                              |             |            |                              |                 |   |                              |                      |                   |                              |                  |   |                              |           |   |                              |                  |   |                      |                          |   |                      |         |   |                      |                     |    |                       |             |    |                       |       |
| 55 | other_side_effect<br>Show the field ONLY if:<br>[list_side_effects(11)] = '1'           | If other: Please specify                                                         | notes                                                                                                                                                                                                                                                                                                                                                                                                                                                                                                                                                                                                                                                                                                                                                                                                                                                            |   |                              |             |            |                              |                 |   |                              |                      |                   |                              |                  |   |                              |           |   |                              |                  |   |                      |                          |   |                      |         |   |                      |                     |    |                       |             |    |                       |       |
| 56 | taken_meds_before                                                                       | Had you ever taken any of these opioid medications before your cesarean section? | radio, Required<br><table border="1"> <tr><td>1</td><td>Yes</td></tr> <tr><td>2</td><td>No</td></tr> <tr><td>3</td><td>Don't know</td></tr> <tr><td>4</td><td>Not applicable</td></tr> <tr><td>5</td><td>Refused to answer</td></tr> <tr><td>6</td><td>Doesn't remember</td></tr> </table>                                                                                                                                                                                                                                                                                                                                                                                                                                                                                                                                                                       | 1 | Yes                          | 2           | No         | 3                            | Don't know      | 4 | Not applicable               | 5                    | Refused to answer | 6                            | Doesn't remember |   |                              |           |   |                              |                  |   |                      |                          |   |                      |         |   |                      |                     |    |                       |             |    |                       |       |
| 1  | Yes                                                                                     |                                                                                  |                                                                                                                                                                                                                                                                                                                                                                                                                                                                                                                                                                                                                                                                                                                                                                                                                                                                  |   |                              |             |            |                              |                 |   |                              |                      |                   |                              |                  |   |                              |           |   |                              |                  |   |                      |                          |   |                      |         |   |                      |                     |    |                       |             |    |                       |       |
| 2  | No                                                                                      |                                                                                  |                                                                                                                                                                                                                                                                                                                                                                                                                                                                                                                                                                                                                                                                                                                                                                                                                                                                  |   |                              |             |            |                              |                 |   |                              |                      |                   |                              |                  |   |                              |           |   |                              |                  |   |                      |                          |   |                      |         |   |                      |                     |    |                       |             |    |                       |       |
| 3  | Don't know                                                                              |                                                                                  |                                                                                                                                                                                                                                                                                                                                                                                                                                                                                                                                                                                                                                                                                                                                                                                                                                                                  |   |                              |             |            |                              |                 |   |                              |                      |                   |                              |                  |   |                              |           |   |                              |                  |   |                      |                          |   |                      |         |   |                      |                     |    |                       |             |    |                       |       |
| 4  | Not applicable                                                                          |                                                                                  |                                                                                                                                                                                                                                                                                                                                                                                                                                                                                                                                                                                                                                                                                                                                                                                                                                                                  |   |                              |             |            |                              |                 |   |                              |                      |                   |                              |                  |   |                              |           |   |                              |                  |   |                      |                          |   |                      |         |   |                      |                     |    |                       |             |    |                       |       |
| 5  | Refused to answer                                                                       |                                                                                  |                                                                                                                                                                                                                                                                                                                                                                                                                                                                                                                                                                                                                                                                                                                                                                                                                                                                  |   |                              |             |            |                              |                 |   |                              |                      |                   |                              |                  |   |                              |           |   |                              |                  |   |                      |                          |   |                      |         |   |                      |                     |    |                       |             |    |                       |       |
| 6  | Doesn't remember                                                                        |                                                                                  |                                                                                                                                                                                                                                                                                                                                                                                                                                                                                                                                                                                                                                                                                                                                                                                                                                                                  |   |                              |             |            |                              |                 |   |                              |                      |                   |                              |                  |   |                              |           |   |                              |                  |   |                      |                          |   |                      |         |   |                      |                     |    |                       |             |    |                       |       |
| 57 | what_opioids_taken_before<br>Show the field ONLY if:<br>[taken_meds_before] = '1'       | If yes: What have you taken?                                                     | checkbox<br><table border="1"> <tr><td>1</td><td>what_opioids_taken_before__1</td><td>Hydrocodone</td></tr> <tr><td>2</td><td>what_opioids_taken_before__2</td><td>Oxycodone</td></tr> <tr><td>3</td><td>what_opioids_taken_before__3</td><td>Percocet</td></tr> <tr><td>4</td><td>what_opioids_taken_before__4</td><td>Hydromorphone</td></tr> <tr><td>5</td><td>what_opioids_taken_before__5</td><td>Other</td></tr> <tr><td>6</td><td>what_opioids_taken_before__6</td><td>Doesn't remember</td></tr> </table>                                                                                                                                                                                                                                                                                                                                                | 1 | what_opioids_taken_before__1 | Hydrocodone | 2          | what_opioids_taken_before__2 | Oxycodone       | 3 | what_opioids_taken_before__3 | Percocet             | 4                 | what_opioids_taken_before__4 | Hydromorphone    | 5 | what_opioids_taken_before__5 | Other     | 6 | what_opioids_taken_before__6 | Doesn't remember |   |                      |                          |   |                      |         |   |                      |                     |    |                       |             |    |                       |       |
| 1  | what_opioids_taken_before__1                                                            | Hydrocodone                                                                      |                                                                                                                                                                                                                                                                                                                                                                                                                                                                                                                                                                                                                                                                                                                                                                                                                                                                  |   |                              |             |            |                              |                 |   |                              |                      |                   |                              |                  |   |                              |           |   |                              |                  |   |                      |                          |   |                      |         |   |                      |                     |    |                       |             |    |                       |       |
| 2  | what_opioids_taken_before__2                                                            | Oxycodone                                                                        |                                                                                                                                                                                                                                                                                                                                                                                                                                                                                                                                                                                                                                                                                                                                                                                                                                                                  |   |                              |             |            |                              |                 |   |                              |                      |                   |                              |                  |   |                              |           |   |                              |                  |   |                      |                          |   |                      |         |   |                      |                     |    |                       |             |    |                       |       |
| 3  | what_opioids_taken_before__3                                                            | Percocet                                                                         |                                                                                                                                                                                                                                                                                                                                                                                                                                                                                                                                                                                                                                                                                                                                                                                                                                                                  |   |                              |             |            |                              |                 |   |                              |                      |                   |                              |                  |   |                              |           |   |                              |                  |   |                      |                          |   |                      |         |   |                      |                     |    |                       |             |    |                       |       |
| 4  | what_opioids_taken_before__4                                                            | Hydromorphone                                                                    |                                                                                                                                                                                                                                                                                                                                                                                                                                                                                                                                                                                                                                                                                                                                                                                                                                                                  |   |                              |             |            |                              |                 |   |                              |                      |                   |                              |                  |   |                              |           |   |                              |                  |   |                      |                          |   |                      |         |   |                      |                     |    |                       |             |    |                       |       |
| 5  | what_opioids_taken_before__5                                                            | Other                                                                            |                                                                                                                                                                                                                                                                                                                                                                                                                                                                                                                                                                                                                                                                                                                                                                                                                                                                  |   |                              |             |            |                              |                 |   |                              |                      |                   |                              |                  |   |                              |           |   |                              |                  |   |                      |                          |   |                      |         |   |                      |                     |    |                       |             |    |                       |       |
| 6  | what_opioids_taken_before__6                                                            | Doesn't remember                                                                 |                                                                                                                                                                                                                                                                                                                                                                                                                                                                                                                                                                                                                                                                                                                                                                                                                                                                  |   |                              |             |            |                              |                 |   |                              |                      |                   |                              |                  |   |                              |           |   |                              |                  |   |                      |                          |   |                      |         |   |                      |                     |    |                       |             |    |                       |       |
| 58 | if_other_meds_before<br>Show the field ONLY if:<br>[what_opioids_taken_before(5)] = '1' | If other: Please specify                                                         | text                                                                                                                                                                                                                                                                                                                                                                                                                                                                                                                                                                                                                                                                                                                                                                                                                                                             |   |                              |             |            |                              |                 |   |                              |                      |                   |                              |                  |   |                              |           |   |                              |                  |   |                      |                          |   |                      |         |   |                      |                     |    |                       |             |    |                       |       |

Bateman BT, Cole NM, Maeda A, Burns SM, Houle TT, Huybrechts KF, et al. Patterns of opioid prescription and use after cesarean delivery. *Obstet Gynecol* 2017; 130.

The authors provided this information as a supplement to their article.

©2017 American College of Obstetricians and Gynecologists.

|    |                                                                                                         |                                                                                                                                                                                                                                                                                                      |                                                                                                                                                                                                                                                                                                                                                                                                                                                                                             |   |                              |                  |    |                              |                         |   |                              |                        |                   |                              |       |   |                              |                  |
|----|---------------------------------------------------------------------------------------------------------|------------------------------------------------------------------------------------------------------------------------------------------------------------------------------------------------------------------------------------------------------------------------------------------------------|---------------------------------------------------------------------------------------------------------------------------------------------------------------------------------------------------------------------------------------------------------------------------------------------------------------------------------------------------------------------------------------------------------------------------------------------------------------------------------------------|---|------------------------------|------------------|----|------------------------------|-------------------------|---|------------------------------|------------------------|-------------------|------------------------------|-------|---|------------------------------|------------------|
| 59 | <p>reasons_why_taken_before</p> <p>Show the field ONLY if:<br/>[taken_meds_before] = '1'</p>            | <p>If yes: For what reasons did you take these pain medications previously?</p>                                                                                                                                                                                                                      | <p>checkbox</p> <table border="1"> <tr> <td>1</td> <td>reasons_why_taken_before___1</td> <td>Previous surgery</td> </tr> <tr> <td>2</td> <td>reasons_why_taken_before___2</td> <td>History of chronic pain</td> </tr> <tr> <td>3</td> <td>reasons_why_taken_before___3</td> <td>Previous injury/trauma</td> </tr> <tr> <td>4</td> <td>reasons_why_taken_before___4</td> <td>Other</td> </tr> <tr> <td>5</td> <td>reasons_why_taken_before___5</td> <td>Doesn't remember</td> </tr> </table> | 1 | reasons_why_taken_before___1 | Previous surgery | 2  | reasons_why_taken_before___2 | History of chronic pain | 3 | reasons_why_taken_before___3 | Previous injury/trauma | 4                 | reasons_why_taken_before___4 | Other | 5 | reasons_why_taken_before___5 | Doesn't remember |
| 1  | reasons_why_taken_before___1                                                                            | Previous surgery                                                                                                                                                                                                                                                                                     |                                                                                                                                                                                                                                                                                                                                                                                                                                                                                             |   |                              |                  |    |                              |                         |   |                              |                        |                   |                              |       |   |                              |                  |
| 2  | reasons_why_taken_before___2                                                                            | History of chronic pain                                                                                                                                                                                                                                                                              |                                                                                                                                                                                                                                                                                                                                                                                                                                                                                             |   |                              |                  |    |                              |                         |   |                              |                        |                   |                              |       |   |                              |                  |
| 3  | reasons_why_taken_before___3                                                                            | Previous injury/trauma                                                                                                                                                                                                                                                                               |                                                                                                                                                                                                                                                                                                                                                                                                                                                                                             |   |                              |                  |    |                              |                         |   |                              |                        |                   |                              |       |   |                              |                  |
| 4  | reasons_why_taken_before___4                                                                            | Other                                                                                                                                                                                                                                                                                                |                                                                                                                                                                                                                                                                                                                                                                                                                                                                                             |   |                              |                  |    |                              |                         |   |                              |                        |                   |                              |       |   |                              |                  |
| 5  | reasons_why_taken_before___5                                                                            | Doesn't remember                                                                                                                                                                                                                                                                                     |                                                                                                                                                                                                                                                                                                                                                                                                                                                                                             |   |                              |                  |    |                              |                         |   |                              |                        |                   |                              |       |   |                              |                  |
| 60 | <p>other_reason_taken_before</p> <p>Show the field ONLY if:<br/>[reasons_why_taken_before(4)] = '1'</p> | <p>If other: Please specify</p>                                                                                                                                                                                                                                                                      | <p>text</p>                                                                                                                                                                                                                                                                                                                                                                                                                                                                                 |   |                              |                  |    |                              |                         |   |                              |                        |                   |                              |       |   |                              |                  |
| 61 | <p>how_often_take_before</p> <p>Show the field ONLY if:<br/>[taken_meds_before] = '1'</p>               | <p>If yes: For how often (estimated per day)?<br/><i>Please do not included units. If patient does not remember, please put "does not remember"</i></p>                                                                                                                                              | <p>text</p>                                                                                                                                                                                                                                                                                                                                                                                                                                                                                 |   |                              |                  |    |                              |                         |   |                              |                        |                   |                              |       |   |                              |                  |
| 62 | <p>how_long_taken_before</p> <p>Show the field ONLY if:<br/>[taken_meds_before] = '1'</p>               | <p>If yes: For how long (estimated by day)?<br/><i>Please do not included units. If patient does not remember, please put "does not remember"</i></p>                                                                                                                                                | <p>text</p>                                                                                                                                                                                                                                                                                                                                                                                                                                                                                 |   |                              |                  |    |                              |                         |   |                              |                        |                   |                              |       |   |                              |                  |
| 63 | <p>other_meds_taken</p>                                                                                 | <p>Did you take any other medications for your pain related to CS after the surgery?</p>                                                                                                                                                                                                             | <p>radio</p> <table border="1"> <tr> <td>1</td> <td>Yes</td> </tr> <tr> <td>2</td> <td>No</td> </tr> <tr> <td>3</td> <td>Don't know</td> </tr> <tr> <td>4</td> <td>Not applicable</td> </tr> <tr> <td>5</td> <td>Refused to answer</td> </tr> </table>                                                                                                                                                                                                                                      | 1 | Yes                          | 2                | No | 3                            | Don't know              | 4 | Not applicable               | 5                      | Refused to answer |                              |       |   |                              |                  |
| 1  | Yes                                                                                                     |                                                                                                                                                                                                                                                                                                      |                                                                                                                                                                                                                                                                                                                                                                                                                                                                                             |   |                              |                  |    |                              |                         |   |                              |                        |                   |                              |       |   |                              |                  |
| 2  | No                                                                                                      |                                                                                                                                                                                                                                                                                                      |                                                                                                                                                                                                                                                                                                                                                                                                                                                                                             |   |                              |                  |    |                              |                         |   |                              |                        |                   |                              |       |   |                              |                  |
| 3  | Don't know                                                                                              |                                                                                                                                                                                                                                                                                                      |                                                                                                                                                                                                                                                                                                                                                                                                                                                                                             |   |                              |                  |    |                              |                         |   |                              |                        |                   |                              |       |   |                              |                  |
| 4  | Not applicable                                                                                          |                                                                                                                                                                                                                                                                                                      |                                                                                                                                                                                                                                                                                                                                                                                                                                                                                             |   |                              |                  |    |                              |                         |   |                              |                        |                   |                              |       |   |                              |                  |
| 5  | Refused to answer                                                                                       |                                                                                                                                                                                                                                                                                                      |                                                                                                                                                                                                                                                                                                                                                                                                                                                                                             |   |                              |                  |    |                              |                         |   |                              |                        |                   |                              |       |   |                              |                  |
| 64 | <p>list_other_meds</p> <p>Show the field ONLY if:<br/>[other_meds_taken] = '1'</p>                      | <p>If yes: Check all that apply</p>                                                                                                                                                                                                                                                                  | <p>checkbox, Required</p> <table border="1"> <tr> <td>1</td> <td>list_other_meds___1</td> <td>Tylenol</td> </tr> <tr> <td>2</td> <td>list_other_meds___2</td> <td>Ibuprofen/Motrin/Advil</td> </tr> <tr> <td>3</td> <td>list_other_meds___3</td> <td>Naproxen/Aleve</td> </tr> <tr> <td>4</td> <td>list_other_meds___4</td> <td>Other</td> </tr> </table>                                                                                                                                   | 1 | list_other_meds___1          | Tylenol          | 2  | list_other_meds___2          | Ibuprofen/Motrin/Advil  | 3 | list_other_meds___3          | Naproxen/Aleve         | 4                 | list_other_meds___4          | Other |   |                              |                  |
| 1  | list_other_meds___1                                                                                     | Tylenol                                                                                                                                                                                                                                                                                              |                                                                                                                                                                                                                                                                                                                                                                                                                                                                                             |   |                              |                  |    |                              |                         |   |                              |                        |                   |                              |       |   |                              |                  |
| 2  | list_other_meds___2                                                                                     | Ibuprofen/Motrin/Advil                                                                                                                                                                                                                                                                               |                                                                                                                                                                                                                                                                                                                                                                                                                                                                                             |   |                              |                  |    |                              |                         |   |                              |                        |                   |                              |       |   |                              |                  |
| 3  | list_other_meds___3                                                                                     | Naproxen/Aleve                                                                                                                                                                                                                                                                                       |                                                                                                                                                                                                                                                                                                                                                                                                                                                                                             |   |                              |                  |    |                              |                         |   |                              |                        |                   |                              |       |   |                              |                  |
| 4  | list_other_meds___4                                                                                     | Other                                                                                                                                                                                                                                                                                                |                                                                                                                                                                                                                                                                                                                                                                                                                                                                                             |   |                              |                  |    |                              |                         |   |                              |                        |                   |                              |       |   |                              |                  |
| 65 | <p>if_other_specify_other_meds</p> <p>Show the field ONLY if:<br/>[list_other_meds(4)] = '1'</p>        | <p>If other: Please specify</p>                                                                                                                                                                                                                                                                      | <p>text</p>                                                                                                                                                                                                                                                                                                                                                                                                                                                                                 |   |                              |                  |    |                              |                         |   |                              |                        |                   |                              |       |   |                              |                  |
| 66 | <p>participate_study_one</p>                                                                            | <p>Can you tell us if you would have been willing to participate if the following study were underway at the time you delivered?<br/>Study 1: A "randomized trial" in which we will assign you by equal chance (like a coin toss) to one of two study groups: The group discharged on either the</p> | <p>radio</p> <table border="1"> <tr> <td>1</td> <td>Yes</td> </tr> <tr> <td>2</td> <td>No</td> </tr> <tr> <td>3</td> <td>Don't know</td> </tr> <tr> <td>4</td> <td>Refused to answer</td> </tr> </table>                                                                                                                                                                                                                                                                                    | 1 | Yes                          | 2                | No | 3                            | Don't know              | 4 | Refused to answer            |                        |                   |                              |       |   |                              |                  |
| 1  | Yes                                                                                                     |                                                                                                                                                                                                                                                                                                      |                                                                                                                                                                                                                                                                                                                                                                                                                                                                                             |   |                              |                  |    |                              |                         |   |                              |                        |                   |                              |       |   |                              |                  |
| 2  | No                                                                                                      |                                                                                                                                                                                                                                                                                                      |                                                                                                                                                                                                                                                                                                                                                                                                                                                                                             |   |                              |                  |    |                              |                         |   |                              |                        |                   |                              |       |   |                              |                  |
| 3  | Don't know                                                                                              |                                                                                                                                                                                                                                                                                                      |                                                                                                                                                                                                                                                                                                                                                                                                                                                                                             |   |                              |                  |    |                              |                         |   |                              |                        |                   |                              |       |   |                              |                  |
| 4  | Refused to answer                                                                                       |                                                                                                                                                                                                                                                                                                      |                                                                                                                                                                                                                                                                                                                                                                                                                                                                                             |   |                              |                  |    |                              |                         |   |                              |                        |                   |                              |       |   |                              |                  |

Bateman BT, Cole NM, Maeda A, Burns SM, Houle TT, Huybrechts KF, et al. Patterns of opioid prescription and use after cesarean delivery. *Obstet Gynecol* 2017; 130.

The authors provided this information as a supplement to their article.

©2017 American College of Obstetricians and Gynecologists.

|    |                                                                                                                                                      |                                                                                                                                                                                                                                                                                                                                                                                                                                                 |                                                                                                                                                                                                      |   |            |   |            |   |            |   |                   |
|----|------------------------------------------------------------------------------------------------------------------------------------------------------|-------------------------------------------------------------------------------------------------------------------------------------------------------------------------------------------------------------------------------------------------------------------------------------------------------------------------------------------------------------------------------------------------------------------------------------------------|------------------------------------------------------------------------------------------------------------------------------------------------------------------------------------------------------|---|------------|---|------------|---|------------|---|-------------------|
|    |                                                                                                                                                      | standard amount of pain medication or the group discharged with a more limited supply, but with the option to refill?                                                                                                                                                                                                                                                                                                                           |                                                                                                                                                                                                      |   |            |   |            |   |            |   |                   |
| 67 | no_study_one_why<br>Show the field ONLY if:<br>[participate_study_one] = '2' or<br>[participate_study_one] = '3' or<br>[participate_study_one] = '4' | If no: Why not?<br><i>Suggested standardized language for some common reasons: "inconvenience", "needed opioids", "fear of breakthrough pain", "doesn't participate in research studies", "doesn't use opioids"</i>                                                                                                                                                                                                                             | notes                                                                                                                                                                                                |   |            |   |            |   |            |   |                   |
| 68 | participate_study_two                                                                                                                                | Can you tell us if you would have been willing to participate if the following study were underway at the time you delivered?<br>Study 2: A "randomized trial" in which we will assign you by equal chance (like a coin toss) to one of two study groups: The group discharged on either the standard amount of pain medication or the group with no opioid medication (but with instructions to use either tylenol and/or ibuprofen for pain)? | radio<br><table border="1"> <tr> <td>1</td> <td>Yes</td> </tr> <tr> <td>2</td> <td>No</td> </tr> <tr> <td>3</td> <td>Don't know</td> </tr> <tr> <td>4</td> <td>Refused to answer</td> </tr> </table> | 1 | Yes        | 2 | No         | 3 | Don't know | 4 | Refused to answer |
| 1  | Yes                                                                                                                                                  |                                                                                                                                                                                                                                                                                                                                                                                                                                                 |                                                                                                                                                                                                      |   |            |   |            |   |            |   |                   |
| 2  | No                                                                                                                                                   |                                                                                                                                                                                                                                                                                                                                                                                                                                                 |                                                                                                                                                                                                      |   |            |   |            |   |            |   |                   |
| 3  | Don't know                                                                                                                                           |                                                                                                                                                                                                                                                                                                                                                                                                                                                 |                                                                                                                                                                                                      |   |            |   |            |   |            |   |                   |
| 4  | Refused to answer                                                                                                                                    |                                                                                                                                                                                                                                                                                                                                                                                                                                                 |                                                                                                                                                                                                      |   |            |   |            |   |            |   |                   |
| 69 | no_study_two_why<br>Show the field ONLY if:<br>[participate_study_two] = '2' or<br>[participate_study_two] = '3' or<br>[participate_study_two] = '4' | If no, why not?<br><i>Suggested standardized language for some common reasons: "inconvenience", "needed opioids", "fear of breakthrough pain", "doesn't participate in research studies", "doesn't use opioids"</i>                                                                                                                                                                                                                             | notes                                                                                                                                                                                                |   |            |   |            |   |            |   |                   |
| 70 | other_survey_comments                                                                                                                                | Other comments?<br><i>If no other patient comments, please write "none"</i>                                                                                                                                                                                                                                                                                                                                                                     | notes                                                                                                                                                                                                |   |            |   |            |   |            |   |                   |
| 71 | survey_data_collection_form_opioid_med_post_cs_stu_complete                                                                                          | Complete?                                                                                                                                                                                                                                                                                                                                                                                                                                       | dropdown<br><table border="1"> <tr> <td>0</td> <td>Incomplete</td> </tr> <tr> <td>1</td> <td>Unverified</td> </tr> <tr> <td>2</td> <td>Complete</td> </tr> </table>                                  | 0 | Incomplete | 1 | Unverified | 2 | Complete   |   |                   |
| 0  | Incomplete                                                                                                                                           |                                                                                                                                                                                                                                                                                                                                                                                                                                                 |                                                                                                                                                                                                      |   |            |   |            |   |            |   |                   |
| 1  | Unverified                                                                                                                                           |                                                                                                                                                                                                                                                                                                                                                                                                                                                 |                                                                                                                                                                                                      |   |            |   |            |   |            |   |                   |
| 2  | Complete                                                                                                                                             |                                                                                                                                                                                                                                                                                                                                                                                                                                                 |                                                                                                                                                                                                      |   |            |   |            |   |            |   |                   |

**Instrument: Followup Survey Data Collection Form Opioid Med Po**

|    |                  |                                                                       |       |
|----|------------------|-----------------------------------------------------------------------|-------|
| 72 | fu_record_id     | Record ID                                                             | text  |
| 73 | fu_study_id      | Study ID<br><i>* use same study ID assigned from previous week(s)</i> | text  |
| 74 | fu_consent_given | Verbal consent given?                                                 | radio |

Bateman BT, Cole NM, Maeda A, Burns SM, Houle TT, Huybrechts KF, et al. Patterns of opioid prescription and use after cesarean delivery. *Obstet Gynecol* 2017; 130.

The authors provided this information as a supplement to their article.

©2017 American College of Obstetricians and Gynecologists.

|    |                     |                                                     |                                                                                                                                                                                                                                                                                                                                                                                                                                                                         |   |     |   |    |   |     |   |   |   |   |   |   |   |   |   |   |   |   |   |   |    |    |    |                |    |         |
|----|---------------------|-----------------------------------------------------|-------------------------------------------------------------------------------------------------------------------------------------------------------------------------------------------------------------------------------------------------------------------------------------------------------------------------------------------------------------------------------------------------------------------------------------------------------------------------|---|-----|---|----|---|-----|---|---|---|---|---|---|---|---|---|---|---|---|---|---|----|----|----|----------------|----|---------|
|    |                     | Check "N/A" if your institution did written consent | <table border="1"> <tr><td>1</td><td>Yes</td></tr> <tr><td>2</td><td>No</td></tr> <tr><td>3</td><td>N/A</td></tr> </table>                                                                                                                                                                                                                                                                                                                                              | 1 | Yes | 2 | No | 3 | N/A |   |   |   |   |   |   |   |   |   |   |   |   |   |   |    |    |    |                |    |         |
| 1  | Yes                 |                                                     |                                                                                                                                                                                                                                                                                                                                                                                                                                                                         |   |     |   |    |   |     |   |   |   |   |   |   |   |   |   |   |   |   |   |   |    |    |    |                |    |         |
| 2  | No                  |                                                     |                                                                                                                                                                                                                                                                                                                                                                                                                                                                         |   |     |   |    |   |     |   |   |   |   |   |   |   |   |   |   |   |   |   |   |    |    |    |                |    |         |
| 3  | N/A                 |                                                     |                                                                                                                                                                                                                                                                                                                                                                                                                                                                         |   |     |   |    |   |     |   |   |   |   |   |   |   |   |   |   |   |   |   |   |    |    |    |                |    |         |
| 75 | fu_date_consent     | Date of Consent:<br>Please enter as: MM/DD/YYYY     | text                                                                                                                                                                                                                                                                                                                                                                                                                                                                    |   |     |   |    |   |     |   |   |   |   |   |   |   |   |   |   |   |   |   |   |    |    |    |                |    |         |
| 76 | fu_time_consent     | Time of Consent:<br>Please enter as: hh:mm am/pm    | text                                                                                                                                                                                                                                                                                                                                                                                                                                                                    |   |     |   |    |   |     |   |   |   |   |   |   |   |   |   |   |   |   |   |   |    |    |    |                |    |         |
| 77 | pain_3rd_week_disch | During the third week after discharge?              | radio (Matrix) <table border="1"> <tr><td>0</td><td>0</td></tr> <tr><td>1</td><td>1</td></tr> <tr><td>2</td><td>2</td></tr> <tr><td>3</td><td>3</td></tr> <tr><td>4</td><td>4</td></tr> <tr><td>5</td><td>5</td></tr> <tr><td>6</td><td>6</td></tr> <tr><td>7</td><td>7</td></tr> <tr><td>8</td><td>8</td></tr> <tr><td>9</td><td>9</td></tr> <tr><td>10</td><td>10</td></tr> <tr><td>11</td><td>Not applicable</td></tr> <tr><td>12</td><td>Missing</td></tr> </table> | 0 | 0   | 1 | 1  | 2 | 2   | 3 | 3 | 4 | 4 | 5 | 5 | 6 | 6 | 7 | 7 | 8 | 8 | 9 | 9 | 10 | 10 | 11 | Not applicable | 12 | Missing |
| 0  | 0                   |                                                     |                                                                                                                                                                                                                                                                                                                                                                                                                                                                         |   |     |   |    |   |     |   |   |   |   |   |   |   |   |   |   |   |   |   |   |    |    |    |                |    |         |
| 1  | 1                   |                                                     |                                                                                                                                                                                                                                                                                                                                                                                                                                                                         |   |     |   |    |   |     |   |   |   |   |   |   |   |   |   |   |   |   |   |   |    |    |    |                |    |         |
| 2  | 2                   |                                                     |                                                                                                                                                                                                                                                                                                                                                                                                                                                                         |   |     |   |    |   |     |   |   |   |   |   |   |   |   |   |   |   |   |   |   |    |    |    |                |    |         |
| 3  | 3                   |                                                     |                                                                                                                                                                                                                                                                                                                                                                                                                                                                         |   |     |   |    |   |     |   |   |   |   |   |   |   |   |   |   |   |   |   |   |    |    |    |                |    |         |
| 4  | 4                   |                                                     |                                                                                                                                                                                                                                                                                                                                                                                                                                                                         |   |     |   |    |   |     |   |   |   |   |   |   |   |   |   |   |   |   |   |   |    |    |    |                |    |         |
| 5  | 5                   |                                                     |                                                                                                                                                                                                                                                                                                                                                                                                                                                                         |   |     |   |    |   |     |   |   |   |   |   |   |   |   |   |   |   |   |   |   |    |    |    |                |    |         |
| 6  | 6                   |                                                     |                                                                                                                                                                                                                                                                                                                                                                                                                                                                         |   |     |   |    |   |     |   |   |   |   |   |   |   |   |   |   |   |   |   |   |    |    |    |                |    |         |
| 7  | 7                   |                                                     |                                                                                                                                                                                                                                                                                                                                                                                                                                                                         |   |     |   |    |   |     |   |   |   |   |   |   |   |   |   |   |   |   |   |   |    |    |    |                |    |         |
| 8  | 8                   |                                                     |                                                                                                                                                                                                                                                                                                                                                                                                                                                                         |   |     |   |    |   |     |   |   |   |   |   |   |   |   |   |   |   |   |   |   |    |    |    |                |    |         |
| 9  | 9                   |                                                     |                                                                                                                                                                                                                                                                                                                                                                                                                                                                         |   |     |   |    |   |     |   |   |   |   |   |   |   |   |   |   |   |   |   |   |    |    |    |                |    |         |
| 10 | 10                  |                                                     |                                                                                                                                                                                                                                                                                                                                                                                                                                                                         |   |     |   |    |   |     |   |   |   |   |   |   |   |   |   |   |   |   |   |   |    |    |    |                |    |         |
| 11 | Not applicable      |                                                     |                                                                                                                                                                                                                                                                                                                                                                                                                                                                         |   |     |   |    |   |     |   |   |   |   |   |   |   |   |   |   |   |   |   |   |    |    |    |                |    |         |
| 12 | Missing             |                                                     |                                                                                                                                                                                                                                                                                                                                                                                                                                                                         |   |     |   |    |   |     |   |   |   |   |   |   |   |   |   |   |   |   |   |   |    |    |    |                |    |         |
| 78 | pain_4th_week_disch | During the fourth week after discharge?             | radio (Matrix) <table border="1"> <tr><td>0</td><td>0</td></tr> <tr><td>1</td><td>1</td></tr> <tr><td>2</td><td>2</td></tr> <tr><td>3</td><td>3</td></tr> <tr><td>4</td><td>4</td></tr> <tr><td>5</td><td>5</td></tr> <tr><td>6</td><td>6</td></tr> <tr><td>7</td><td>7</td></tr> <tr><td>8</td><td>8</td></tr> <tr><td>9</td><td>9</td></tr> <tr><td>10</td><td>10</td></tr> <tr><td>11</td><td>Not applicable</td></tr> <tr><td>12</td><td>Missing</td></tr> </table> | 0 | 0   | 1 | 1  | 2 | 2   | 3 | 3 | 4 | 4 | 5 | 5 | 6 | 6 | 7 | 7 | 8 | 8 | 9 | 9 | 10 | 10 | 11 | Not applicable | 12 | Missing |
| 0  | 0                   |                                                     |                                                                                                                                                                                                                                                                                                                                                                                                                                                                         |   |     |   |    |   |     |   |   |   |   |   |   |   |   |   |   |   |   |   |   |    |    |    |                |    |         |
| 1  | 1                   |                                                     |                                                                                                                                                                                                                                                                                                                                                                                                                                                                         |   |     |   |    |   |     |   |   |   |   |   |   |   |   |   |   |   |   |   |   |    |    |    |                |    |         |
| 2  | 2                   |                                                     |                                                                                                                                                                                                                                                                                                                                                                                                                                                                         |   |     |   |    |   |     |   |   |   |   |   |   |   |   |   |   |   |   |   |   |    |    |    |                |    |         |
| 3  | 3                   |                                                     |                                                                                                                                                                                                                                                                                                                                                                                                                                                                         |   |     |   |    |   |     |   |   |   |   |   |   |   |   |   |   |   |   |   |   |    |    |    |                |    |         |
| 4  | 4                   |                                                     |                                                                                                                                                                                                                                                                                                                                                                                                                                                                         |   |     |   |    |   |     |   |   |   |   |   |   |   |   |   |   |   |   |   |   |    |    |    |                |    |         |
| 5  | 5                   |                                                     |                                                                                                                                                                                                                                                                                                                                                                                                                                                                         |   |     |   |    |   |     |   |   |   |   |   |   |   |   |   |   |   |   |   |   |    |    |    |                |    |         |
| 6  | 6                   |                                                     |                                                                                                                                                                                                                                                                                                                                                                                                                                                                         |   |     |   |    |   |     |   |   |   |   |   |   |   |   |   |   |   |   |   |   |    |    |    |                |    |         |
| 7  | 7                   |                                                     |                                                                                                                                                                                                                                                                                                                                                                                                                                                                         |   |     |   |    |   |     |   |   |   |   |   |   |   |   |   |   |   |   |   |   |    |    |    |                |    |         |
| 8  | 8                   |                                                     |                                                                                                                                                                                                                                                                                                                                                                                                                                                                         |   |     |   |    |   |     |   |   |   |   |   |   |   |   |   |   |   |   |   |   |    |    |    |                |    |         |
| 9  | 9                   |                                                     |                                                                                                                                                                                                                                                                                                                                                                                                                                                                         |   |     |   |    |   |     |   |   |   |   |   |   |   |   |   |   |   |   |   |   |    |    |    |                |    |         |
| 10 | 10                  |                                                     |                                                                                                                                                                                                                                                                                                                                                                                                                                                                         |   |     |   |    |   |     |   |   |   |   |   |   |   |   |   |   |   |   |   |   |    |    |    |                |    |         |
| 11 | Not applicable      |                                                     |                                                                                                                                                                                                                                                                                                                                                                                                                                                                         |   |     |   |    |   |     |   |   |   |   |   |   |   |   |   |   |   |   |   |   |    |    |    |                |    |         |
| 12 | Missing             |                                                     |                                                                                                                                                                                                                                                                                                                                                                                                                                                                         |   |     |   |    |   |     |   |   |   |   |   |   |   |   |   |   |   |   |   |   |    |    |    |                |    |         |

Bateman BT, Cole NM, Maeda A, Burns SM, Houle TT, Huybrechts KF, et al. Patterns of opioid prescription and use after cesarean delivery. *Obstet Gynecol* 2017; 130.

The authors provided this information as a supplement to their article.

©2017 American College of Obstetricians and Gynecologists.

|                |                                                                                       |                                                                                     |                                                                                                                                                                                                                                                                                                                                                                                                                                                                                                       |                |  |   |     |                               |                        |   |            |   |                |   |   |   |   |   |   |   |   |   |   |   |   |    |    |    |                |    |         |
|----------------|---------------------------------------------------------------------------------------|-------------------------------------------------------------------------------------|-------------------------------------------------------------------------------------------------------------------------------------------------------------------------------------------------------------------------------------------------------------------------------------------------------------------------------------------------------------------------------------------------------------------------------------------------------------------------------------------------------|----------------|--|---|-----|-------------------------------|------------------------|---|------------|---|----------------|---|---|---|---|---|---|---|---|---|---|---|---|----|----|----|----------------|----|---------|
| 79             | pain_5th_week_disch                                                                   | During the fifth week after discharge?                                              | <table border="1"> <tr><td colspan="2">radio (Matrix)</td></tr> <tr><td>0</td><td>0</td></tr> <tr><td>1</td><td>1</td></tr> <tr><td>2</td><td>2</td></tr> <tr><td>3</td><td>3</td></tr> <tr><td>4</td><td>4</td></tr> <tr><td>5</td><td>5</td></tr> <tr><td>6</td><td>6</td></tr> <tr><td>7</td><td>7</td></tr> <tr><td>8</td><td>8</td></tr> <tr><td>9</td><td>9</td></tr> <tr><td>10</td><td>10</td></tr> <tr><td>11</td><td>Not applicable</td></tr> <tr><td>12</td><td>Missing</td></tr> </table> | radio (Matrix) |  | 0 | 0   | 1                             | 1                      | 2 | 2          | 3 | 3              | 4 | 4 | 5 | 5 | 6 | 6 | 7 | 7 | 8 | 8 | 9 | 9 | 10 | 10 | 11 | Not applicable | 12 | Missing |
| radio (Matrix) |                                                                                       |                                                                                     |                                                                                                                                                                                                                                                                                                                                                                                                                                                                                                       |                |  |   |     |                               |                        |   |            |   |                |   |   |   |   |   |   |   |   |   |   |   |   |    |    |    |                |    |         |
| 0              | 0                                                                                     |                                                                                     |                                                                                                                                                                                                                                                                                                                                                                                                                                                                                                       |                |  |   |     |                               |                        |   |            |   |                |   |   |   |   |   |   |   |   |   |   |   |   |    |    |    |                |    |         |
| 1              | 1                                                                                     |                                                                                     |                                                                                                                                                                                                                                                                                                                                                                                                                                                                                                       |                |  |   |     |                               |                        |   |            |   |                |   |   |   |   |   |   |   |   |   |   |   |   |    |    |    |                |    |         |
| 2              | 2                                                                                     |                                                                                     |                                                                                                                                                                                                                                                                                                                                                                                                                                                                                                       |                |  |   |     |                               |                        |   |            |   |                |   |   |   |   |   |   |   |   |   |   |   |   |    |    |    |                |    |         |
| 3              | 3                                                                                     |                                                                                     |                                                                                                                                                                                                                                                                                                                                                                                                                                                                                                       |                |  |   |     |                               |                        |   |            |   |                |   |   |   |   |   |   |   |   |   |   |   |   |    |    |    |                |    |         |
| 4              | 4                                                                                     |                                                                                     |                                                                                                                                                                                                                                                                                                                                                                                                                                                                                                       |                |  |   |     |                               |                        |   |            |   |                |   |   |   |   |   |   |   |   |   |   |   |   |    |    |    |                |    |         |
| 5              | 5                                                                                     |                                                                                     |                                                                                                                                                                                                                                                                                                                                                                                                                                                                                                       |                |  |   |     |                               |                        |   |            |   |                |   |   |   |   |   |   |   |   |   |   |   |   |    |    |    |                |    |         |
| 6              | 6                                                                                     |                                                                                     |                                                                                                                                                                                                                                                                                                                                                                                                                                                                                                       |                |  |   |     |                               |                        |   |            |   |                |   |   |   |   |   |   |   |   |   |   |   |   |    |    |    |                |    |         |
| 7              | 7                                                                                     |                                                                                     |                                                                                                                                                                                                                                                                                                                                                                                                                                                                                                       |                |  |   |     |                               |                        |   |            |   |                |   |   |   |   |   |   |   |   |   |   |   |   |    |    |    |                |    |         |
| 8              | 8                                                                                     |                                                                                     |                                                                                                                                                                                                                                                                                                                                                                                                                                                                                                       |                |  |   |     |                               |                        |   |            |   |                |   |   |   |   |   |   |   |   |   |   |   |   |    |    |    |                |    |         |
| 9              | 9                                                                                     |                                                                                     |                                                                                                                                                                                                                                                                                                                                                                                                                                                                                                       |                |  |   |     |                               |                        |   |            |   |                |   |   |   |   |   |   |   |   |   |   |   |   |    |    |    |                |    |         |
| 10             | 10                                                                                    |                                                                                     |                                                                                                                                                                                                                                                                                                                                                                                                                                                                                                       |                |  |   |     |                               |                        |   |            |   |                |   |   |   |   |   |   |   |   |   |   |   |   |    |    |    |                |    |         |
| 11             | Not applicable                                                                        |                                                                                     |                                                                                                                                                                                                                                                                                                                                                                                                                                                                                                       |                |  |   |     |                               |                        |   |            |   |                |   |   |   |   |   |   |   |   |   |   |   |   |    |    |    |                |    |         |
| 12             | Missing                                                                               |                                                                                     |                                                                                                                                                                                                                                                                                                                                                                                                                                                                                                       |                |  |   |     |                               |                        |   |            |   |                |   |   |   |   |   |   |   |   |   |   |   |   |    |    |    |                |    |         |
| 80             | pain_6th_week_disch                                                                   | During the sixth week after discharge?                                              | <table border="1"> <tr><td colspan="2">radio (Matrix)</td></tr> <tr><td>0</td><td>0</td></tr> <tr><td>1</td><td>1</td></tr> <tr><td>2</td><td>2</td></tr> <tr><td>3</td><td>3</td></tr> <tr><td>4</td><td>4</td></tr> <tr><td>5</td><td>5</td></tr> <tr><td>6</td><td>6</td></tr> <tr><td>7</td><td>7</td></tr> <tr><td>8</td><td>8</td></tr> <tr><td>9</td><td>9</td></tr> <tr><td>10</td><td>10</td></tr> <tr><td>11</td><td>Not applicable</td></tr> <tr><td>12</td><td>Missing</td></tr> </table> | radio (Matrix) |  | 0 | 0   | 1                             | 1                      | 2 | 2          | 3 | 3              | 4 | 4 | 5 | 5 | 6 | 6 | 7 | 7 | 8 | 8 | 9 | 9 | 10 | 10 | 11 | Not applicable | 12 | Missing |
| radio (Matrix) |                                                                                       |                                                                                     |                                                                                                                                                                                                                                                                                                                                                                                                                                                                                                       |                |  |   |     |                               |                        |   |            |   |                |   |   |   |   |   |   |   |   |   |   |   |   |    |    |    |                |    |         |
| 0              | 0                                                                                     |                                                                                     |                                                                                                                                                                                                                                                                                                                                                                                                                                                                                                       |                |  |   |     |                               |                        |   |            |   |                |   |   |   |   |   |   |   |   |   |   |   |   |    |    |    |                |    |         |
| 1              | 1                                                                                     |                                                                                     |                                                                                                                                                                                                                                                                                                                                                                                                                                                                                                       |                |  |   |     |                               |                        |   |            |   |                |   |   |   |   |   |   |   |   |   |   |   |   |    |    |    |                |    |         |
| 2              | 2                                                                                     |                                                                                     |                                                                                                                                                                                                                                                                                                                                                                                                                                                                                                       |                |  |   |     |                               |                        |   |            |   |                |   |   |   |   |   |   |   |   |   |   |   |   |    |    |    |                |    |         |
| 3              | 3                                                                                     |                                                                                     |                                                                                                                                                                                                                                                                                                                                                                                                                                                                                                       |                |  |   |     |                               |                        |   |            |   |                |   |   |   |   |   |   |   |   |   |   |   |   |    |    |    |                |    |         |
| 4              | 4                                                                                     |                                                                                     |                                                                                                                                                                                                                                                                                                                                                                                                                                                                                                       |                |  |   |     |                               |                        |   |            |   |                |   |   |   |   |   |   |   |   |   |   |   |   |    |    |    |                |    |         |
| 5              | 5                                                                                     |                                                                                     |                                                                                                                                                                                                                                                                                                                                                                                                                                                                                                       |                |  |   |     |                               |                        |   |            |   |                |   |   |   |   |   |   |   |   |   |   |   |   |    |    |    |                |    |         |
| 6              | 6                                                                                     |                                                                                     |                                                                                                                                                                                                                                                                                                                                                                                                                                                                                                       |                |  |   |     |                               |                        |   |            |   |                |   |   |   |   |   |   |   |   |   |   |   |   |    |    |    |                |    |         |
| 7              | 7                                                                                     |                                                                                     |                                                                                                                                                                                                                                                                                                                                                                                                                                                                                                       |                |  |   |     |                               |                        |   |            |   |                |   |   |   |   |   |   |   |   |   |   |   |   |    |    |    |                |    |         |
| 8              | 8                                                                                     |                                                                                     |                                                                                                                                                                                                                                                                                                                                                                                                                                                                                                       |                |  |   |     |                               |                        |   |            |   |                |   |   |   |   |   |   |   |   |   |   |   |   |    |    |    |                |    |         |
| 9              | 9                                                                                     |                                                                                     |                                                                                                                                                                                                                                                                                                                                                                                                                                                                                                       |                |  |   |     |                               |                        |   |            |   |                |   |   |   |   |   |   |   |   |   |   |   |   |    |    |    |                |    |         |
| 10             | 10                                                                                    |                                                                                     |                                                                                                                                                                                                                                                                                                                                                                                                                                                                                                       |                |  |   |     |                               |                        |   |            |   |                |   |   |   |   |   |   |   |   |   |   |   |   |    |    |    |                |    |         |
| 11             | Not applicable                                                                        |                                                                                     |                                                                                                                                                                                                                                                                                                                                                                                                                                                                                                       |                |  |   |     |                               |                        |   |            |   |                |   |   |   |   |   |   |   |   |   |   |   |   |    |    |    |                |    |         |
| 12             | Missing                                                                               |                                                                                     |                                                                                                                                                                                                                                                                                                                                                                                                                                                                                                       |                |  |   |     |                               |                        |   |            |   |                |   |   |   |   |   |   |   |   |   |   |   |   |    |    |    |                |    |         |
| 81             | fu_seek_addl_med_care                                                                 | Did you seek any additional medical care for your pain since you left the hospital? | <table border="1"> <tr><td colspan="2">radio</td></tr> <tr><td>1</td><td>Yes</td></tr> <tr><td>2</td><td>No</td></tr> <tr><td>3</td><td>Don't know</td></tr> <tr><td>4</td><td>Did not answer</td></tr> </table>                                                                                                                                                                                                                                                                                      | radio          |  | 1 | Yes | 2                             | No                     | 3 | Don't know | 4 | Did not answer |   |   |   |   |   |   |   |   |   |   |   |   |    |    |    |                |    |         |
| radio          |                                                                                       |                                                                                     |                                                                                                                                                                                                                                                                                                                                                                                                                                                                                                       |                |  |   |     |                               |                        |   |            |   |                |   |   |   |   |   |   |   |   |   |   |   |   |    |    |    |                |    |         |
| 1              | Yes                                                                                   |                                                                                     |                                                                                                                                                                                                                                                                                                                                                                                                                                                                                                       |                |  |   |     |                               |                        |   |            |   |                |   |   |   |   |   |   |   |   |   |   |   |   |    |    |    |                |    |         |
| 2              | No                                                                                    |                                                                                     |                                                                                                                                                                                                                                                                                                                                                                                                                                                                                                       |                |  |   |     |                               |                        |   |            |   |                |   |   |   |   |   |   |   |   |   |   |   |   |    |    |    |                |    |         |
| 3              | Don't know                                                                            |                                                                                     |                                                                                                                                                                                                                                                                                                                                                                                                                                                                                                       |                |  |   |     |                               |                        |   |            |   |                |   |   |   |   |   |   |   |   |   |   |   |   |    |    |    |                |    |         |
| 4              | Did not answer                                                                        |                                                                                     |                                                                                                                                                                                                                                                                                                                                                                                                                                                                                                       |                |  |   |     |                               |                        |   |            |   |                |   |   |   |   |   |   |   |   |   |   |   |   |    |    |    |                |    |         |
| 82             | fu_y_sought_addl_med_care<br>Show the field ONLY if:<br>[fu_seek_addl_med_care] = '1' | If yes: Check all that apply                                                        | <table border="1"> <tr><td colspan="3">checkbox</td></tr> <tr> <td>1</td> <td>fu_y_sought_addl_med_care___1</td> <td>Go back to your doctor</td> </tr> </table>                                                                                                                                                                                                                                                                                                                                       | checkbox       |  |   | 1   | fu_y_sought_addl_med_care___1 | Go back to your doctor |   |            |   |                |   |   |   |   |   |   |   |   |   |   |   |   |    |    |    |                |    |         |
| checkbox       |                                                                                       |                                                                                     |                                                                                                                                                                                                                                                                                                                                                                                                                                                                                                       |                |  |   |     |                               |                        |   |            |   |                |   |   |   |   |   |   |   |   |   |   |   |   |    |    |    |                |    |         |
| 1              | fu_y_sought_addl_med_care___1                                                         | Go back to your doctor                                                              |                                                                                                                                                                                                                                                                                                                                                                                                                                                                                                       |                |  |   |     |                               |                        |   |            |   |                |   |   |   |   |   |   |   |   |   |   |   |   |    |    |    |                |    |         |

Bateman BT, Cole NM, Maeda A, Burns SM, Houle TT, Huybrechts KF, et al. Patterns of opioid prescription and use after cesarean delivery. *Obstet Gynecol* 2017; 130.

The authors provided this information as a supplement to their article.

©2017 American College of Obstetricians and Gynecologists.

|    |                                                                                                                                                                                                                                                        |                                                                                                                                                                         |                                                                                                                                                                                                                                                                                                                                                                                                                                                                                  |   |                           |                                 |    |                               |                              |   |                               |                     |   |                               |                   |   |                               |       |
|----|--------------------------------------------------------------------------------------------------------------------------------------------------------------------------------------------------------------------------------------------------------|-------------------------------------------------------------------------------------------------------------------------------------------------------------------------|----------------------------------------------------------------------------------------------------------------------------------------------------------------------------------------------------------------------------------------------------------------------------------------------------------------------------------------------------------------------------------------------------------------------------------------------------------------------------------|---|---------------------------|---------------------------------|----|-------------------------------|------------------------------|---|-------------------------------|---------------------|---|-------------------------------|-------------------|---|-------------------------------|-------|
|    |                                                                                                                                                                                                                                                        |                                                                                                                                                                         | <table border="1"> <tr> <td></td> <td></td> <td>(outpatient)</td> </tr> <tr> <td>2</td> <td>fu_y_sought_addl_med_care___2</td> <td>Re-admission to the hospital</td> </tr> <tr> <td>3</td> <td>fu_y_sought_addl_med_care___3</td> <td>Emergency clinics</td> </tr> <tr> <td>4</td> <td>fu_y_sought_addl_med_care___4</td> <td>Minute clinic</td> </tr> <tr> <td>5</td> <td>fu_y_sought_addl_med_care___5</td> <td>Other</td> </tr> </table>                                      |   |                           | (outpatient)                    | 2  | fu_y_sought_addl_med_care___2 | Re-admission to the hospital | 3 | fu_y_sought_addl_med_care___3 | Emergency clinics   | 4 | fu_y_sought_addl_med_care___4 | Minute clinic     | 5 | fu_y_sought_addl_med_care___5 | Other |
|    |                                                                                                                                                                                                                                                        | (outpatient)                                                                                                                                                            |                                                                                                                                                                                                                                                                                                                                                                                                                                                                                  |   |                           |                                 |    |                               |                              |   |                               |                     |   |                               |                   |   |                               |       |
| 2  | fu_y_sought_addl_med_care___2                                                                                                                                                                                                                          | Re-admission to the hospital                                                                                                                                            |                                                                                                                                                                                                                                                                                                                                                                                                                                                                                  |   |                           |                                 |    |                               |                              |   |                               |                     |   |                               |                   |   |                               |       |
| 3  | fu_y_sought_addl_med_care___3                                                                                                                                                                                                                          | Emergency clinics                                                                                                                                                       |                                                                                                                                                                                                                                                                                                                                                                                                                                                                                  |   |                           |                                 |    |                               |                              |   |                               |                     |   |                               |                   |   |                               |       |
| 4  | fu_y_sought_addl_med_care___4                                                                                                                                                                                                                          | Minute clinic                                                                                                                                                           |                                                                                                                                                                                                                                                                                                                                                                                                                                                                                  |   |                           |                                 |    |                               |                              |   |                               |                     |   |                               |                   |   |                               |       |
| 5  | fu_y_sought_addl_med_care___5                                                                                                                                                                                                                          | Other                                                                                                                                                                   |                                                                                                                                                                                                                                                                                                                                                                                                                                                                                  |   |                           |                                 |    |                               |                              |   |                               |                     |   |                               |                   |   |                               |       |
| 83 | fu_comm_addl_med_care_pain<br>Show the field ONLY if:<br>[fu_seek_addl_med_care] = '1'                                                                                                                                                                 | If yes to additional medical care for pain, please comment further                                                                                                      | notes                                                                                                                                                                                                                                                                                                                                                                                                                                                                            |   |                           |                                 |    |                               |                              |   |                               |                     |   |                               |                   |   |                               |       |
| 84 | fu_other_addl_med_care<br>Show the field ONLY if:<br>[fu_y_sought_addl_med_care(5)] = '1'                                                                                                                                                              | If other: Please specify<br><i>Note: May include acupuncture, massage, other medicine from friends/family, etc.</i>                                                     | notes                                                                                                                                                                                                                                                                                                                                                                                                                                                                            |   |                           |                                 |    |                               |                              |   |                               |                     |   |                               |                   |   |                               |       |
| 85 | fu_bottle_avail                                                                                                                                                                                                                                        | Do you have your opioid (pain) medicine prescription bottle available, to read off the script label?                                                                    | radio<br><table border="1"> <tr> <td>1</td> <td>Yes</td> </tr> <tr> <td>2</td> <td>No</td> </tr> <tr> <td>3</td> <td>Don't know</td> </tr> <tr> <td>4</td> <td>Did not answer</td> </tr> </table>                                                                                                                                                                                                                                                                                | 1 | Yes                       | 2                               | No | 3                             | Don't know                   | 4 | Did not answer                |                     |   |                               |                   |   |                               |       |
| 1  | Yes                                                                                                                                                                                                                                                    |                                                                                                                                                                         |                                                                                                                                                                                                                                                                                                                                                                                                                                                                                  |   |                           |                                 |    |                               |                              |   |                               |                     |   |                               |                   |   |                               |       |
| 2  | No                                                                                                                                                                                                                                                     |                                                                                                                                                                         |                                                                                                                                                                                                                                                                                                                                                                                                                                                                                  |   |                           |                                 |    |                               |                              |   |                               |                     |   |                               |                   |   |                               |       |
| 3  | Don't know                                                                                                                                                                                                                                             |                                                                                                                                                                         |                                                                                                                                                                                                                                                                                                                                                                                                                                                                                  |   |                           |                                 |    |                               |                              |   |                               |                     |   |                               |                   |   |                               |       |
| 4  | Did not answer                                                                                                                                                                                                                                         |                                                                                                                                                                         |                                                                                                                                                                                                                                                                                                                                                                                                                                                                                  |   |                           |                                 |    |                               |                              |   |                               |                     |   |                               |                   |   |                               |       |
| 86 | fu_why_rx_unavailable<br>Show the field ONLY if:<br>[fu_bottle_avail] = '2' or<br>[fu_bottle_avail] = '3' or<br>[fu_bottle_avail] = '4'                                                                                                                | Why don't you have your bottle available?                                                                                                                               | checkbox<br><table border="1"> <tr> <td>1</td> <td>fu_why_rx_unavailable___1</td> <td>Bottle is not with me right now</td> </tr> <tr> <td>2</td> <td>fu_why_rx_unavailable___2</td> <td>Disposed of script</td> </tr> <tr> <td>3</td> <td>fu_why_rx_unavailable___3</td> <td>Finished the script</td> </tr> <tr> <td>4</td> <td>fu_why_rx_unavailable___4</td> <td>Refused to answer</td> </tr> <tr> <td>5</td> <td>fu_why_rx_unavailable___5</td> <td>Other</td> </tr> </table> | 1 | fu_why_rx_unavailable___1 | Bottle is not with me right now | 2  | fu_why_rx_unavailable___2     | Disposed of script           | 3 | fu_why_rx_unavailable___3     | Finished the script | 4 | fu_why_rx_unavailable___4     | Refused to answer | 5 | fu_why_rx_unavailable___5     | Other |
| 1  | fu_why_rx_unavailable___1                                                                                                                                                                                                                              | Bottle is not with me right now                                                                                                                                         |                                                                                                                                                                                                                                                                                                                                                                                                                                                                                  |   |                           |                                 |    |                               |                              |   |                               |                     |   |                               |                   |   |                               |       |
| 2  | fu_why_rx_unavailable___2                                                                                                                                                                                                                              | Disposed of script                                                                                                                                                      |                                                                                                                                                                                                                                                                                                                                                                                                                                                                                  |   |                           |                                 |    |                               |                              |   |                               |                     |   |                               |                   |   |                               |       |
| 3  | fu_why_rx_unavailable___3                                                                                                                                                                                                                              | Finished the script                                                                                                                                                     |                                                                                                                                                                                                                                                                                                                                                                                                                                                                                  |   |                           |                                 |    |                               |                              |   |                               |                     |   |                               |                   |   |                               |       |
| 4  | fu_why_rx_unavailable___4                                                                                                                                                                                                                              | Refused to answer                                                                                                                                                       |                                                                                                                                                                                                                                                                                                                                                                                                                                                                                  |   |                           |                                 |    |                               |                              |   |                               |                     |   |                               |                   |   |                               |       |
| 5  | fu_why_rx_unavailable___5                                                                                                                                                                                                                              | Other                                                                                                                                                                   |                                                                                                                                                                                                                                                                                                                                                                                                                                                                                  |   |                           |                                 |    |                               |                              |   |                               |                     |   |                               |                   |   |                               |       |
| 87 | fu_rx_other_unavailable<br>Show the field ONLY if:<br>[fu_why_rx_unavailable(5)] = '1'                                                                                                                                                                 | If other: Please specify                                                                                                                                                | notes                                                                                                                                                                                                                                                                                                                                                                                                                                                                            |   |                           |                                 |    |                               |                              |   |                               |                     |   |                               |                   |   |                               |       |
| 88 | fu_call_back_na<br>Show the field ONLY if:<br>[fu_bottle_avail] = '2' or<br>[fu_bottle_avail] = '3' or<br>[fu_bottle_avail] = '4' or<br>[fu_why_rx_unavailable(1)] = '1' or<br>[fu_why_rx_unavailable(5)] = '1' or<br>[fu_why_rx_unavailable(4)] = '1' | Is there a good time to call you back when you'll have the bottle with you?<br><i>If yes: Call back and pick up survey where left off; otherwise comment on why not</i> | radio<br><table border="1"> <tr> <td>1</td> <td>Yes</td> </tr> <tr> <td>2</td> <td>No</td> </tr> <tr> <td>3</td> <td>Don't know</td> </tr> <tr> <td>4</td> <td>Didn't answer</td> </tr> </table>                                                                                                                                                                                                                                                                                 | 1 | Yes                       | 2                               | No | 3                             | Don't know                   | 4 | Didn't answer                 |                     |   |                               |                   |   |                               |       |
| 1  | Yes                                                                                                                                                                                                                                                    |                                                                                                                                                                         |                                                                                                                                                                                                                                                                                                                                                                                                                                                                                  |   |                           |                                 |    |                               |                              |   |                               |                     |   |                               |                   |   |                               |       |
| 2  | No                                                                                                                                                                                                                                                     |                                                                                                                                                                         |                                                                                                                                                                                                                                                                                                                                                                                                                                                                                  |   |                           |                                 |    |                               |                              |   |                               |                     |   |                               |                   |   |                               |       |
| 3  | Don't know                                                                                                                                                                                                                                             |                                                                                                                                                                         |                                                                                                                                                                                                                                                                                                                                                                                                                                                                                  |   |                           |                                 |    |                               |                              |   |                               |                     |   |                               |                   |   |                               |       |
| 4  | Didn't answer                                                                                                                                                                                                                                          |                                                                                                                                                                         |                                                                                                                                                                                                                                                                                                                                                                                                                                                                                  |   |                           |                                 |    |                               |                              |   |                               |                     |   |                               |                   |   |                               |       |
| 89 | fu_why_no_callback<br>Show the field ONLY if:<br>[fu_call_back_na] = '2' or<br>[fu_call_back_na] = '3' or<br>[fu_call_back_na] = '4'                                                                                                                   | If calling back is not an option: List comments on why, if applicable                                                                                                   | notes                                                                                                                                                                                                                                                                                                                                                                                                                                                                            |   |                           |                                 |    |                               |                              |   |                               |                     |   |                               |                   |   |                               |       |
| 90 | fu_label_rx_type<br>Show the field ONLY if:<br>[fu_bottle_avail] = '1'                                                                                                                                                                                 | Can you read off the label, and state what type of opioid pain medication you have?                                                                                     | checkbox<br><table border="1"> <tr> <td>1</td> <td>fu_label_rx_type___1</td> <td>Hydrocodone</td> </tr> </table>                                                                                                                                                                                                                                                                                                                                                                 | 1 | fu_label_rx_type___1      | Hydrocodone                     |    |                               |                              |   |                               |                     |   |                               |                   |   |                               |       |
| 1  | fu_label_rx_type___1                                                                                                                                                                                                                                   | Hydrocodone                                                                                                                                                             |                                                                                                                                                                                                                                                                                                                                                                                                                                                                                  |   |                           |                                 |    |                               |                              |   |                               |                     |   |                               |                   |   |                               |       |

Bateman BT, Cole NM, Maeda A, Burns SM, Houle TT, Huybrechts KF, et al. Patterns of opioid prescription and use after cesarean delivery. *Obstet Gynecol* 2017; 130.

The authors provided this information as a supplement to their article.

©2017 American College of Obstetricians and Gynecologists.

|    |                                                                                                                                                                                                                                                                                                                                                   |                                                                                                                                                                    |                                                                                                                                                                                                                                                                                                                                                                                                                                                                                                                |   |                           |             |   |                           |           |   |                           |               |   |                           |               |   |                           |       |   |                           |            |
|----|---------------------------------------------------------------------------------------------------------------------------------------------------------------------------------------------------------------------------------------------------------------------------------------------------------------------------------------------------|--------------------------------------------------------------------------------------------------------------------------------------------------------------------|----------------------------------------------------------------------------------------------------------------------------------------------------------------------------------------------------------------------------------------------------------------------------------------------------------------------------------------------------------------------------------------------------------------------------------------------------------------------------------------------------------------|---|---------------------------|-------------|---|---------------------------|-----------|---|---------------------------|---------------|---|---------------------------|---------------|---|---------------------------|-------|---|---------------------------|------------|
|    |                                                                                                                                                                                                                                                                                                                                                   |                                                                                                                                                                    | <table border="1"> <tr> <td>2</td> <td>fu_label_rx_type__2</td> <td>Oxycodone</td> </tr> <tr> <td>3</td> <td>fu_label_rx_type__3</td> <td>Percocet</td> </tr> <tr> <td>4</td> <td>fu_label_rx_type__4</td> <td>Hydromorphone</td> </tr> <tr> <td>5</td> <td>fu_label_rx_type__5</td> <td>Other</td> </tr> </table>                                                                                                                                                                                             | 2 | fu_label_rx_type__2       | Oxycodone   | 3 | fu_label_rx_type__3       | Percocet  | 4 | fu_label_rx_type__4       | Hydromorphone | 5 | fu_label_rx_type__5       | Other         |   |                           |       |   |                           |            |
| 2  | fu_label_rx_type__2                                                                                                                                                                                                                                                                                                                               | Oxycodone                                                                                                                                                          |                                                                                                                                                                                                                                                                                                                                                                                                                                                                                                                |   |                           |             |   |                           |           |   |                           |               |   |                           |               |   |                           |       |   |                           |            |
| 3  | fu_label_rx_type__3                                                                                                                                                                                                                                                                                                                               | Percocet                                                                                                                                                           |                                                                                                                                                                                                                                                                                                                                                                                                                                                                                                                |   |                           |             |   |                           |           |   |                           |               |   |                           |               |   |                           |       |   |                           |            |
| 4  | fu_label_rx_type__4                                                                                                                                                                                                                                                                                                                               | Hydromorphone                                                                                                                                                      |                                                                                                                                                                                                                                                                                                                                                                                                                                                                                                                |   |                           |             |   |                           |           |   |                           |               |   |                           |               |   |                           |       |   |                           |            |
| 5  | fu_label_rx_type__5                                                                                                                                                                                                                                                                                                                               | Other                                                                                                                                                              |                                                                                                                                                                                                                                                                                                                                                                                                                                                                                                                |   |                           |             |   |                           |           |   |                           |               |   |                           |               |   |                           |       |   |                           |            |
| 91 | fu_specify_other_painmed<br>Show the field ONLY if:<br>[fu_label_rx_type(5)] = '1'                                                                                                                                                                                                                                                                | If other: Please specify                                                                                                                                           | notes                                                                                                                                                                                                                                                                                                                                                                                                                                                                                                          |   |                           |             |   |                           |           |   |                           |               |   |                           |               |   |                           |       |   |                           |            |
| 92 | fu_opioid_rx_strength<br>Show the field ONLY if:<br>[fu_bottle_avail] = '1'                                                                                                                                                                                                                                                                       | Can you read off the label, and state the strength of the opioid medication(s) you have (in mg?)                                                                   | text                                                                                                                                                                                                                                                                                                                                                                                                                                                                                                           |   |                           |             |   |                           |           |   |                           |               |   |                           |               |   |                           |       |   |                           |            |
| 93 | fu_opioid_tabs_dispensed<br>Show the field ONLY if:<br>[fu_bottle_avail] = '1'                                                                                                                                                                                                                                                                    | Can you read off the label, and state how many tablets were dispensed?                                                                                             | text                                                                                                                                                                                                                                                                                                                                                                                                                                                                                                           |   |                           |             |   |                           |           |   |                           |               |   |                           |               |   |                           |       |   |                           |            |
| 94 | fu_leftover_pills<br>Show the field ONLY if:<br>[fu_bottle_avail] = '1'                                                                                                                                                                                                                                                                           | How many pills do you have leftover (counted)?                                                                                                                     | text                                                                                                                                                                                                                                                                                                                                                                                                                                                                                                           |   |                           |             |   |                           |           |   |                           |               |   |                           |               |   |                           |       |   |                           |            |
| 95 | fu_unavailable_rx_type<br>Show the field ONLY if:<br>[fu_why_rx_unavailable(2)] = '1' or [fu_why_rx_unavailable(3)] = '1' or [fu_why_rx_unavailable(4)] = '1' or [fu_why_rx_unavailable(5)] = '1' or [fu_why_rx_unavailable(1)] = '1' or [fu_bottle_avail] = '2' or [fu_bottle_avail] = '3' or [fu_bottle_avail] = '4'                            | Can you remember the type (name) of the opioid prescribed?                                                                                                         | checkbox <table border="1"> <tr> <td>1</td> <td>fu_unavailable_rx_type__1</td> <td>Hydrocodone</td> </tr> <tr> <td>2</td> <td>fu_unavailable_rx_type__2</td> <td>Oxycodone</td> </tr> <tr> <td>3</td> <td>fu_unavailable_rx_type__3</td> <td>Percocet</td> </tr> <tr> <td>4</td> <td>fu_unavailable_rx_type__4</td> <td>Hydromorphone</td> </tr> <tr> <td>5</td> <td>fu_unavailable_rx_type__5</td> <td>Other</td> </tr> <tr> <td>6</td> <td>fu_unavailable_rx_type__6</td> <td>Don't know</td> </tr> </table> | 1 | fu_unavailable_rx_type__1 | Hydrocodone | 2 | fu_unavailable_rx_type__2 | Oxycodone | 3 | fu_unavailable_rx_type__3 | Percocet      | 4 | fu_unavailable_rx_type__4 | Hydromorphone | 5 | fu_unavailable_rx_type__5 | Other | 6 | fu_unavailable_rx_type__6 | Don't know |
| 1  | fu_unavailable_rx_type__1                                                                                                                                                                                                                                                                                                                         | Hydrocodone                                                                                                                                                        |                                                                                                                                                                                                                                                                                                                                                                                                                                                                                                                |   |                           |             |   |                           |           |   |                           |               |   |                           |               |   |                           |       |   |                           |            |
| 2  | fu_unavailable_rx_type__2                                                                                                                                                                                                                                                                                                                         | Oxycodone                                                                                                                                                          |                                                                                                                                                                                                                                                                                                                                                                                                                                                                                                                |   |                           |             |   |                           |           |   |                           |               |   |                           |               |   |                           |       |   |                           |            |
| 3  | fu_unavailable_rx_type__3                                                                                                                                                                                                                                                                                                                         | Percocet                                                                                                                                                           |                                                                                                                                                                                                                                                                                                                                                                                                                                                                                                                |   |                           |             |   |                           |           |   |                           |               |   |                           |               |   |                           |       |   |                           |            |
| 4  | fu_unavailable_rx_type__4                                                                                                                                                                                                                                                                                                                         | Hydromorphone                                                                                                                                                      |                                                                                                                                                                                                                                                                                                                                                                                                                                                                                                                |   |                           |             |   |                           |           |   |                           |               |   |                           |               |   |                           |       |   |                           |            |
| 5  | fu_unavailable_rx_type__5                                                                                                                                                                                                                                                                                                                         | Other                                                                                                                                                              |                                                                                                                                                                                                                                                                                                                                                                                                                                                                                                                |   |                           |             |   |                           |           |   |                           |               |   |                           |               |   |                           |       |   |                           |            |
| 6  | fu_unavailable_rx_type__6                                                                                                                                                                                                                                                                                                                         | Don't know                                                                                                                                                         |                                                                                                                                                                                                                                                                                                                                                                                                                                                                                                                |   |                           |             |   |                           |           |   |                           |               |   |                           |               |   |                           |       |   |                           |            |
| 96 | fu_other_rx_type_memory<br>Show the field ONLY if:<br>[fu_unavailable_rx_type(5)] = '1'                                                                                                                                                                                                                                                           | If other: Please specify                                                                                                                                           | notes                                                                                                                                                                                                                                                                                                                                                                                                                                                                                                          |   |                           |             |   |                           |           |   |                           |               |   |                           |               |   |                           |       |   |                           |            |
| 97 | fu_na_opioid_strength<br>Show the field ONLY if:<br>[fu_bottle_avail] = '2' or [fu_bottle_avail] = '3' or [fu_bottle_avail] = '4' or [fu_why_rx_unavailable(1)] = '1' or [fu_why_rx_unavailable(2)] = '1' or [fu_why_rx_unavailable(3)] = '1' or [fu_why_rx_unavailable(4)] = '1' or [fu_why_rx_unavailable(5)] = '1' and [fu_call_back_na] = '2' | Can you remember the strength of the opioid prescription (in mg)?<br><i>Write "NA" if patient doesn't remember and try to determine in EMR</i>                     | text                                                                                                                                                                                                                                                                                                                                                                                                                                                                                                           |   |                           |             |   |                           |           |   |                           |               |   |                           |               |   |                           |       |   |                           |            |
| 98 | fu_na_tablet_number<br>Show the field ONLY if:<br>[fu_bottle_avail] = '2' or [fu_bottle_avail] = '3' or [fu_bottle_avail] = '4' or [fu_why_rx_unavailable(1)] = '1' or [fu_why_rx_unavailable(2)] = '1' or [fu_why_rx_unavailable(3)] = '1'                                                                                                       | Can you remember/estimate how many pills were dispensed for your opioid prescription?<br><i>Write "NA" if patient doesn't remember and try to determine in EMR</i> | text                                                                                                                                                                                                                                                                                                                                                                                                                                                                                                           |   |                           |             |   |                           |           |   |                           |               |   |                           |               |   |                           |       |   |                           |            |

Bateman BT, Cole NM, Maeda A, Burns SM, Houle TT, Huybrechts KF, et al. Patterns of opioid prescription and use after cesarean delivery. *Obstet Gynecol* 2017; 130.

The authors provided this information as a supplement to their article.

©2017 American College of Obstetricians and Gynecologists.

|     |                                                                                                                                                                                                                                                                                                                                                                                 |                                                                                                                              |                                                                                                                                                                                                                                                                                                                                                                                                                                                                                                                                                                                                                                                                                           |   |                              |                   |    |                              |                    |   |                          |                 |   |                          |                               |   |                          |            |   |                          |                     |   |                          |                   |   |                          |       |
|-----|---------------------------------------------------------------------------------------------------------------------------------------------------------------------------------------------------------------------------------------------------------------------------------------------------------------------------------------------------------------------------------|------------------------------------------------------------------------------------------------------------------------------|-------------------------------------------------------------------------------------------------------------------------------------------------------------------------------------------------------------------------------------------------------------------------------------------------------------------------------------------------------------------------------------------------------------------------------------------------------------------------------------------------------------------------------------------------------------------------------------------------------------------------------------------------------------------------------------------|---|------------------------------|-------------------|----|------------------------------|--------------------|---|--------------------------|-----------------|---|--------------------------|-------------------------------|---|--------------------------|------------|---|--------------------------|---------------------|---|--------------------------|-------------------|---|--------------------------|-------|
|     | = '1' or<br>[fu_why_rx_unavailable(4)] = '1'<br>or [fu_why_rx_unavailable(5)] =<br>'1' and [fu_call_back_na] = '2'                                                                                                                                                                                                                                                              |                                                                                                                              |                                                                                                                                                                                                                                                                                                                                                                                                                                                                                                                                                                                                                                                                                           |   |                              |                   |    |                              |                    |   |                          |                 |   |                          |                               |   |                          |            |   |                          |                     |   |                          |                   |   |                          |       |
| 99  | fu_pills_leftover_memory<br>Show the field ONLY if:<br>[fu_why_rx_unavailable(2)] = '1'<br>or [fu_why_rx_unavailable(1)] =<br>'1' or [fu_why_rx_unavailable(4)]<br>= '1' or<br>[fu_why_rx_unavailable(5)] = '1'<br>or [fu_why_rx_unavailable(3)] =<br>'1' or [fu_bottle_avail] = '2' or<br>[fu_bottle_avail] = '3' or<br>[fu_bottle_avail] = '4' and<br>[fu_call_back_na] = '2' | Can you estimate the number of<br>pills you have/had leftover?<br><i>Write "NA" if patient doesn't<br/>remember</i>          | text                                                                                                                                                                                                                                                                                                                                                                                                                                                                                                                                                                                                                                                                                      |   |                              |                   |    |                              |                    |   |                          |                 |   |                          |                               |   |                          |            |   |                          |                     |   |                          |                   |   |                          |       |
| 100 | fu_throw_out_opioids<br>Show the field ONLY if:<br>[fu_why_rx_unavailable(1)] = '1'<br>and [fu_why_rx_unavailable(3)]<br>= '1' and<br>[fu_why_rx_unavailable(4)] = '1'<br>and [fu_why_rx_unavailable(5)]<br>= '1'                                                                                                                                                               | Did you throw out any pills?                                                                                                 | radio<br><table border="1"> <tr><td>1</td><td>Yes</td></tr> <tr><td>2</td><td>No</td></tr> <tr><td>3</td><td>Don't know</td></tr> <tr><td>4</td><td>Did not answer</td></tr> </table>                                                                                                                                                                                                                                                                                                                                                                                                                                                                                                     | 1 | Yes                          | 2                 | No | 3                            | Don't know         | 4 | Did not answer           |                 |   |                          |                               |   |                          |            |   |                          |                     |   |                          |                   |   |                          |       |
| 1   | Yes                                                                                                                                                                                                                                                                                                                                                                             |                                                                                                                              |                                                                                                                                                                                                                                                                                                                                                                                                                                                                                                                                                                                                                                                                                           |   |                              |                   |    |                              |                    |   |                          |                 |   |                          |                               |   |                          |            |   |                          |                     |   |                          |                   |   |                          |       |
| 2   | No                                                                                                                                                                                                                                                                                                                                                                              |                                                                                                                              |                                                                                                                                                                                                                                                                                                                                                                                                                                                                                                                                                                                                                                                                                           |   |                              |                   |    |                              |                    |   |                          |                 |   |                          |                               |   |                          |            |   |                          |                     |   |                          |                   |   |                          |       |
| 3   | Don't know                                                                                                                                                                                                                                                                                                                                                                      |                                                                                                                              |                                                                                                                                                                                                                                                                                                                                                                                                                                                                                                                                                                                                                                                                                           |   |                              |                   |    |                              |                    |   |                          |                 |   |                          |                               |   |                          |            |   |                          |                     |   |                          |                   |   |                          |       |
| 4   | Did not answer                                                                                                                                                                                                                                                                                                                                                                  |                                                                                                                              |                                                                                                                                                                                                                                                                                                                                                                                                                                                                                                                                                                                                                                                                                           |   |                              |                   |    |                              |                    |   |                          |                 |   |                          |                               |   |                          |            |   |                          |                     |   |                          |                   |   |                          |       |
| 101 | fu_number_opioids_diposed<br>Show the field ONLY if:<br>[fu_throw_out_opioids] = '1' or<br>[fu_why_rx_unavailable(2)] = '1'                                                                                                                                                                                                                                                     | Please estimate how many pills<br>were thrown out                                                                            | text                                                                                                                                                                                                                                                                                                                                                                                                                                                                                                                                                                                                                                                                                      |   |                              |                   |    |                              |                    |   |                          |                 |   |                          |                               |   |                          |            |   |                          |                     |   |                          |                   |   |                          |       |
| 102 | fu_how_pills_disposed<br>Show the field ONLY if:<br>[fu_throw_out_opioids] = '1' or<br>[fu_why_rx_unavailable(2)] = '1'                                                                                                                                                                                                                                                         | How did you dispose of your<br>pills/                                                                                        | checkbox<br><table border="1"> <tr><td>1</td><td>fu_how_pills_disposed__1</td><td>Flush down toilet</td></tr> <tr><td>2</td><td>fu_how_pills_disposed__2</td><td>Throw out in trash</td></tr> <tr><td>3</td><td>fu_how_pills_disposed__3</td><td>Stash somewhere</td></tr> <tr><td>4</td><td>fu_how_pills_disposed__4</td><td>Bring to pill drop-off center</td></tr> <tr><td>5</td><td>fu_how_pills_disposed__5</td><td>Lost track</td></tr> <tr><td>6</td><td>fu_how_pills_disposed__6</td><td>Don't remember/know</td></tr> <tr><td>7</td><td>fu_how_pills_disposed__7</td><td>Refused to answer</td></tr> <tr><td>8</td><td>fu_how_pills_disposed__8</td><td>Other</td></tr> </table> | 1 | fu_how_pills_disposed__1     | Flush down toilet | 2  | fu_how_pills_disposed__2     | Throw out in trash | 3 | fu_how_pills_disposed__3 | Stash somewhere | 4 | fu_how_pills_disposed__4 | Bring to pill drop-off center | 5 | fu_how_pills_disposed__5 | Lost track | 6 | fu_how_pills_disposed__6 | Don't remember/know | 7 | fu_how_pills_disposed__7 | Refused to answer | 8 | fu_how_pills_disposed__8 | Other |
| 1   | fu_how_pills_disposed__1                                                                                                                                                                                                                                                                                                                                                        | Flush down toilet                                                                                                            |                                                                                                                                                                                                                                                                                                                                                                                                                                                                                                                                                                                                                                                                                           |   |                              |                   |    |                              |                    |   |                          |                 |   |                          |                               |   |                          |            |   |                          |                     |   |                          |                   |   |                          |       |
| 2   | fu_how_pills_disposed__2                                                                                                                                                                                                                                                                                                                                                        | Throw out in trash                                                                                                           |                                                                                                                                                                                                                                                                                                                                                                                                                                                                                                                                                                                                                                                                                           |   |                              |                   |    |                              |                    |   |                          |                 |   |                          |                               |   |                          |            |   |                          |                     |   |                          |                   |   |                          |       |
| 3   | fu_how_pills_disposed__3                                                                                                                                                                                                                                                                                                                                                        | Stash somewhere                                                                                                              |                                                                                                                                                                                                                                                                                                                                                                                                                                                                                                                                                                                                                                                                                           |   |                              |                   |    |                              |                    |   |                          |                 |   |                          |                               |   |                          |            |   |                          |                     |   |                          |                   |   |                          |       |
| 4   | fu_how_pills_disposed__4                                                                                                                                                                                                                                                                                                                                                        | Bring to pill drop-off center                                                                                                |                                                                                                                                                                                                                                                                                                                                                                                                                                                                                                                                                                                                                                                                                           |   |                              |                   |    |                              |                    |   |                          |                 |   |                          |                               |   |                          |            |   |                          |                     |   |                          |                   |   |                          |       |
| 5   | fu_how_pills_disposed__5                                                                                                                                                                                                                                                                                                                                                        | Lost track                                                                                                                   |                                                                                                                                                                                                                                                                                                                                                                                                                                                                                                                                                                                                                                                                                           |   |                              |                   |    |                              |                    |   |                          |                 |   |                          |                               |   |                          |            |   |                          |                     |   |                          |                   |   |                          |       |
| 6   | fu_how_pills_disposed__6                                                                                                                                                                                                                                                                                                                                                        | Don't remember/know                                                                                                          |                                                                                                                                                                                                                                                                                                                                                                                                                                                                                                                                                                                                                                                                                           |   |                              |                   |    |                              |                    |   |                          |                 |   |                          |                               |   |                          |            |   |                          |                     |   |                          |                   |   |                          |       |
| 7   | fu_how_pills_disposed__7                                                                                                                                                                                                                                                                                                                                                        | Refused to answer                                                                                                            |                                                                                                                                                                                                                                                                                                                                                                                                                                                                                                                                                                                                                                                                                           |   |                              |                   |    |                              |                    |   |                          |                 |   |                          |                               |   |                          |            |   |                          |                     |   |                          |                   |   |                          |       |
| 8   | fu_how_pills_disposed__8                                                                                                                                                                                                                                                                                                                                                        | Other                                                                                                                        |                                                                                                                                                                                                                                                                                                                                                                                                                                                                                                                                                                                                                                                                                           |   |                              |                   |    |                              |                    |   |                          |                 |   |                          |                               |   |                          |            |   |                          |                     |   |                          |                   |   |                          |       |
| 103 | fu_any_refills_opioids                                                                                                                                                                                                                                                                                                                                                          | Did you get any refills for these<br>opioid pain medications (and list<br>names: oxycodone, percocet,<br>hydrocodone, etc.)? | radio<br><table border="1"> <tr><td>1</td><td>Yes</td></tr> <tr><td>2</td><td>No</td></tr> <tr><td>3</td><td>Don't know</td></tr> <tr><td>4</td><td>Did not answer</td></tr> </table>                                                                                                                                                                                                                                                                                                                                                                                                                                                                                                     | 1 | Yes                          | 2                 | No | 3                            | Don't know         | 4 | Did not answer           |                 |   |                          |                               |   |                          |            |   |                          |                     |   |                          |                   |   |                          |       |
| 1   | Yes                                                                                                                                                                                                                                                                                                                                                                             |                                                                                                                              |                                                                                                                                                                                                                                                                                                                                                                                                                                                                                                                                                                                                                                                                                           |   |                              |                   |    |                              |                    |   |                          |                 |   |                          |                               |   |                          |            |   |                          |                     |   |                          |                   |   |                          |       |
| 2   | No                                                                                                                                                                                                                                                                                                                                                                              |                                                                                                                              |                                                                                                                                                                                                                                                                                                                                                                                                                                                                                                                                                                                                                                                                                           |   |                              |                   |    |                              |                    |   |                          |                 |   |                          |                               |   |                          |            |   |                          |                     |   |                          |                   |   |                          |       |
| 3   | Don't know                                                                                                                                                                                                                                                                                                                                                                      |                                                                                                                              |                                                                                                                                                                                                                                                                                                                                                                                                                                                                                                                                                                                                                                                                                           |   |                              |                   |    |                              |                    |   |                          |                 |   |                          |                               |   |                          |            |   |                          |                     |   |                          |                   |   |                          |       |
| 4   | Did not answer                                                                                                                                                                                                                                                                                                                                                                  |                                                                                                                              |                                                                                                                                                                                                                                                                                                                                                                                                                                                                                                                                                                                                                                                                                           |   |                              |                   |    |                              |                    |   |                          |                 |   |                          |                               |   |                          |            |   |                          |                     |   |                          |                   |   |                          |       |
| 104 | fu_which_opioids_refilled<br>Show the field ONLY if:<br>[fu_any_refills_opioids] = '1'                                                                                                                                                                                                                                                                                          | If yes to refill: Which ones?                                                                                                | checkbox<br><table border="1"> <tr><td>1</td><td>fu_which_opioids_refilled__1</td><td>Hydrocodone</td></tr> <tr><td>2</td><td>fu_which_opioids_refilled__2</td><td>Oxycodone</td></tr> </table>                                                                                                                                                                                                                                                                                                                                                                                                                                                                                           | 1 | fu_which_opioids_refilled__1 | Hydrocodone       | 2  | fu_which_opioids_refilled__2 | Oxycodone          |   |                          |                 |   |                          |                               |   |                          |            |   |                          |                     |   |                          |                   |   |                          |       |
| 1   | fu_which_opioids_refilled__1                                                                                                                                                                                                                                                                                                                                                    | Hydrocodone                                                                                                                  |                                                                                                                                                                                                                                                                                                                                                                                                                                                                                                                                                                                                                                                                                           |   |                              |                   |    |                              |                    |   |                          |                 |   |                          |                               |   |                          |            |   |                          |                     |   |                          |                   |   |                          |       |
| 2   | fu_which_opioids_refilled__2                                                                                                                                                                                                                                                                                                                                                    | Oxycodone                                                                                                                    |                                                                                                                                                                                                                                                                                                                                                                                                                                                                                                                                                                                                                                                                                           |   |                              |                   |    |                              |                    |   |                          |                 |   |                          |                               |   |                          |            |   |                          |                     |   |                          |                   |   |                          |       |

Bateman BT, Cole NM, Maeda A, Burns SM, Houle TT, Huybrechts KF, et al. Patterns of opioid prescription and use after cesarean delivery. *Obstet Gynecol* 2017; 130.

The authors provided this information as a supplement to their article.

©2017 American College of Obstetricians and Gynecologists.



|     |                                                                                              |                                                                                            |                                                                                                                                                                                                                                                                                                                                                                               |   |                              |          |                 |                              |                    |   |                              |       |              |   |                   |   |                |
|-----|----------------------------------------------------------------------------------------------|--------------------------------------------------------------------------------------------|-------------------------------------------------------------------------------------------------------------------------------------------------------------------------------------------------------------------------------------------------------------------------------------------------------------------------------------------------------------------------------|---|------------------------------|----------|-----------------|------------------------------|--------------------|---|------------------------------|-------|--------------|---|-------------------|---|----------------|
|     |                                                                                              |                                                                                            | <table border="1"> <tr> <td>3</td> <td>fu_which_opioids_refilled__3</td> <td>Percocet</td> </tr> <tr> <td>4</td> <td>fu_which_opioids_refilled__4</td> <td>Hydromorphone</td> </tr> <tr> <td>5</td> <td>fu_which_opioids_refilled__5</td> <td>Other</td> </tr> </table>                                                                                                       | 3 | fu_which_opioids_refilled__3 | Percocet | 4               | fu_which_opioids_refilled__4 | Hydromorphone      | 5 | fu_which_opioids_refilled__5 | Other |              |   |                   |   |                |
| 3   | fu_which_opioids_refilled__3                                                                 | Percocet                                                                                   |                                                                                                                                                                                                                                                                                                                                                                               |   |                              |          |                 |                              |                    |   |                              |       |              |   |                   |   |                |
| 4   | fu_which_opioids_refilled__4                                                                 | Hydromorphone                                                                              |                                                                                                                                                                                                                                                                                                                                                                               |   |                              |          |                 |                              |                    |   |                              |       |              |   |                   |   |                |
| 5   | fu_which_opioids_refilled__5                                                                 | Other                                                                                      |                                                                                                                                                                                                                                                                                                                                                                               |   |                              |          |                 |                              |                    |   |                              |       |              |   |                   |   |                |
| 105 | fu_opioid_refill_other<br>Show the field ONLY if:<br>[fu_which_opioids_refilled(5)] =<br>'1' | If other: Please specify                                                                   | notes                                                                                                                                                                                                                                                                                                                                                                         |   |                              |          |                 |                              |                    |   |                              |       |              |   |                   |   |                |
| 106 | fu_plan_to_refill_opioids                                                                    | Do you plan to refill this opioid prescription?                                            | radio <table border="1"> <tr> <td>1</td> <td>Yes</td> </tr> <tr> <td>2</td> <td>No</td> </tr> <tr> <td>3</td> <td>Don't know</td> </tr> <tr> <td>4</td> <td>Did not answer</td> </tr> </table>                                                                                                                                                                                | 1 | Yes                          | 2        | No              | 3                            | Don't know         | 4 | Did not answer               |       |              |   |                   |   |                |
| 1   | Yes                                                                                          |                                                                                            |                                                                                                                                                                                                                                                                                                                                                                               |   |                              |          |                 |                              |                    |   |                              |       |              |   |                   |   |                |
| 2   | No                                                                                           |                                                                                            |                                                                                                                                                                                                                                                                                                                                                                               |   |                              |          |                 |                              |                    |   |                              |       |              |   |                   |   |                |
| 3   | Don't know                                                                                   |                                                                                            |                                                                                                                                                                                                                                                                                                                                                                               |   |                              |          |                 |                              |                    |   |                              |       |              |   |                   |   |                |
| 4   | Did not answer                                                                               |                                                                                            |                                                                                                                                                                                                                                                                                                                                                                               |   |                              |          |                 |                              |                    |   |                              |       |              |   |                   |   |                |
| 107 | fu_when_stopped_meds                                                                         | How many days after discharge did you stop taking these medications?                       | text                                                                                                                                                                                                                                                                                                                                                                          |   |                              |          |                 |                              |                    |   |                              |       |              |   |                   |   |                |
| 108 | fu_rate_opioid_quantity                                                                      | Given your experience, did you think the supply of your initial opioid prescription was... | radio <table border="1"> <tr> <td>1</td> <td>Too little</td> </tr> <tr> <td>2</td> <td>Too much</td> </tr> <tr> <td>3</td> <td>Just right</td> </tr> <tr> <td>4</td> <td>Not applicable</td> </tr> </table>                                                                                                                                                                   | 1 | Too little                   | 2        | Too much        | 3                            | Just right         | 4 | Not applicable               |       |              |   |                   |   |                |
| 1   | Too little                                                                                   |                                                                                            |                                                                                                                                                                                                                                                                                                                                                                               |   |                              |          |                 |                              |                    |   |                              |       |              |   |                   |   |                |
| 2   | Too much                                                                                     |                                                                                            |                                                                                                                                                                                                                                                                                                                                                                               |   |                              |          |                 |                              |                    |   |                              |       |              |   |                   |   |                |
| 3   | Just right                                                                                   |                                                                                            |                                                                                                                                                                                                                                                                                                                                                                               |   |                              |          |                 |                              |                    |   |                              |       |              |   |                   |   |                |
| 4   | Not applicable                                                                               |                                                                                            |                                                                                                                                                                                                                                                                                                                                                                               |   |                              |          |                 |                              |                    |   |                              |       |              |   |                   |   |                |
| 109 | fu_how_often_take_opioids                                                                    | While on each medication, on average how often did you take them per day?                  | radio <table border="1"> <tr> <td>1</td> <td>Once a day</td> </tr> <tr> <td>2</td> <td>2-3 times a day</td> </tr> <tr> <td>3</td> <td>4-6 times per day</td> </tr> <tr> <td>4</td> <td>&gt;6 times per day</td> </tr> <tr> <td>5</td> <td>NA</td> </tr> </table>                                                                                                              | 1 | Once a day                   | 2        | 2-3 times a day | 3                            | 4-6 times per day  | 4 | >6 times per day             | 5     | NA           |   |                   |   |                |
| 1   | Once a day                                                                                   |                                                                                            |                                                                                                                                                                                                                                                                                                                                                                               |   |                              |          |                 |                              |                    |   |                              |       |              |   |                   |   |                |
| 2   | 2-3 times a day                                                                              |                                                                                            |                                                                                                                                                                                                                                                                                                                                                                               |   |                              |          |                 |                              |                    |   |                              |       |              |   |                   |   |                |
| 3   | 4-6 times per day                                                                            |                                                                                            |                                                                                                                                                                                                                                                                                                                                                                               |   |                              |          |                 |                              |                    |   |                              |       |              |   |                   |   |                |
| 4   | >6 times per day                                                                             |                                                                                            |                                                                                                                                                                                                                                                                                                                                                                               |   |                              |          |                 |                              |                    |   |                              |       |              |   |                   |   |                |
| 5   | NA                                                                                           |                                                                                            |                                                                                                                                                                                                                                                                                                                                                                               |   |                              |          |                 |                              |                    |   |                              |       |              |   |                   |   |                |
| 110 | fu_opioids_change_freq                                                                       | Did this frequency change over time (estimate by day?)                                     | notes                                                                                                                                                                                                                                                                                                                                                                         |   |                              |          |                 |                              |                    |   |                              |       |              |   |                   |   |                |
| 111 | fu_rate_pain_relief                                                                          | Did you get adequate pain relief, on a scale of:                                           | dropdown <table border="1"> <tr> <td>1</td> <td>Very satisfied</td> </tr> <tr> <td>2</td> <td>Satisfied</td> </tr> <tr> <td>3</td> <td>Slightly satisfied</td> </tr> <tr> <td>4</td> <td>Slightly dissatisfied</td> </tr> <tr> <td>5</td> <td>Dissatisfied</td> </tr> <tr> <td>6</td> <td>Very dissatisfied</td> </tr> <tr> <td>7</td> <td>Not applicable</td> </tr> </table> | 1 | Very satisfied               | 2        | Satisfied       | 3                            | Slightly satisfied | 4 | Slightly dissatisfied        | 5     | Dissatisfied | 6 | Very dissatisfied | 7 | Not applicable |
| 1   | Very satisfied                                                                               |                                                                                            |                                                                                                                                                                                                                                                                                                                                                                               |   |                              |          |                 |                              |                    |   |                              |       |              |   |                   |   |                |
| 2   | Satisfied                                                                                    |                                                                                            |                                                                                                                                                                                                                                                                                                                                                                               |   |                              |          |                 |                              |                    |   |                              |       |              |   |                   |   |                |
| 3   | Slightly satisfied                                                                           |                                                                                            |                                                                                                                                                                                                                                                                                                                                                                               |   |                              |          |                 |                              |                    |   |                              |       |              |   |                   |   |                |
| 4   | Slightly dissatisfied                                                                        |                                                                                            |                                                                                                                                                                                                                                                                                                                                                                               |   |                              |          |                 |                              |                    |   |                              |       |              |   |                   |   |                |
| 5   | Dissatisfied                                                                                 |                                                                                            |                                                                                                                                                                                                                                                                                                                                                                               |   |                              |          |                 |                              |                    |   |                              |       |              |   |                   |   |                |
| 6   | Very dissatisfied                                                                            |                                                                                            |                                                                                                                                                                                                                                                                                                                                                                               |   |                              |          |                 |                              |                    |   |                              |       |              |   |                   |   |                |
| 7   | Not applicable                                                                               |                                                                                            |                                                                                                                                                                                                                                                                                                                                                                               |   |                              |          |                 |                              |                    |   |                              |       |              |   |                   |   |                |
| 112 | fu_any_med_side_effects                                                                      | Did you have any side effects                                                              | radio                                                                                                                                                                                                                                                                                                                                                                         |   |                              |          |                 |                              |                    |   |                              |       |              |   |                   |   |                |

Bateman BT, Cole NM, Maeda A, Burns SM, Houle TT, Huybrechts KF, et al. Patterns of opioid prescription and use after cesarean delivery. *Obstet Gynecol* 2017; 130.

The authors provided this information as a supplement to their article.

©2017 American College of Obstetricians and Gynecologists.

|     |                                                                                         |                                                                                        |                                                                                                                                                                                                                                                                                                                                                                                                                                                                                                                                                                                                                                                                                                                                                                                                                                                                                        |   |                           |             |    |                           |                             |   |                           |                      |                   |                           |               |   |                           |           |   |                           |                  |   |                         |                          |   |                         |           |   |                         |                     |    |                          |             |    |                          |       |
|-----|-----------------------------------------------------------------------------------------|----------------------------------------------------------------------------------------|----------------------------------------------------------------------------------------------------------------------------------------------------------------------------------------------------------------------------------------------------------------------------------------------------------------------------------------------------------------------------------------------------------------------------------------------------------------------------------------------------------------------------------------------------------------------------------------------------------------------------------------------------------------------------------------------------------------------------------------------------------------------------------------------------------------------------------------------------------------------------------------|---|---------------------------|-------------|----|---------------------------|-----------------------------|---|---------------------------|----------------------|-------------------|---------------------------|---------------|---|---------------------------|-----------|---|---------------------------|------------------|---|-------------------------|--------------------------|---|-------------------------|-----------|---|-------------------------|---------------------|----|--------------------------|-------------|----|--------------------------|-------|
|     |                                                                                         | from the pain medications?                                                             | <table border="1"> <tr><td>1</td><td>Yes</td></tr> <tr><td>2</td><td>No</td></tr> <tr><td>3</td><td>Don't know</td></tr> <tr><td>4</td><td>Not applicable</td></tr> <tr><td>5</td><td>Refused to answer</td></tr> </table>                                                                                                                                                                                                                                                                                                                                                                                                                                                                                                                                                                                                                                                             | 1 | Yes                       | 2           | No | 3                         | Don't know                  | 4 | Not applicable            | 5                    | Refused to answer |                           |               |   |                           |           |   |                           |                  |   |                         |                          |   |                         |           |   |                         |                     |    |                          |             |    |                          |       |
| 1   | Yes                                                                                     |                                                                                        |                                                                                                                                                                                                                                                                                                                                                                                                                                                                                                                                                                                                                                                                                                                                                                                                                                                                                        |   |                           |             |    |                           |                             |   |                           |                      |                   |                           |               |   |                           |           |   |                           |                  |   |                         |                          |   |                         |           |   |                         |                     |    |                          |             |    |                          |       |
| 2   | No                                                                                      |                                                                                        |                                                                                                                                                                                                                                                                                                                                                                                                                                                                                                                                                                                                                                                                                                                                                                                                                                                                                        |   |                           |             |    |                           |                             |   |                           |                      |                   |                           |               |   |                           |           |   |                           |                  |   |                         |                          |   |                         |           |   |                         |                     |    |                          |             |    |                          |       |
| 3   | Don't know                                                                              |                                                                                        |                                                                                                                                                                                                                                                                                                                                                                                                                                                                                                                                                                                                                                                                                                                                                                                                                                                                                        |   |                           |             |    |                           |                             |   |                           |                      |                   |                           |               |   |                           |           |   |                           |                  |   |                         |                          |   |                         |           |   |                         |                     |    |                          |             |    |                          |       |
| 4   | Not applicable                                                                          |                                                                                        |                                                                                                                                                                                                                                                                                                                                                                                                                                                                                                                                                                                                                                                                                                                                                                                                                                                                                        |   |                           |             |    |                           |                             |   |                           |                      |                   |                           |               |   |                           |           |   |                           |                  |   |                         |                          |   |                         |           |   |                         |                     |    |                          |             |    |                          |       |
| 5   | Refused to answer                                                                       |                                                                                        |                                                                                                                                                                                                                                                                                                                                                                                                                                                                                                                                                                                                                                                                                                                                                                                                                                                                                        |   |                           |             |    |                           |                             |   |                           |                      |                   |                           |               |   |                           |           |   |                           |                  |   |                         |                          |   |                         |           |   |                         |                     |    |                          |             |    |                          |       |
| 113 | fu_list_side_effects<br>Show the field ONLY if:<br>[fu_any_med_side_effects] = '1'      | If yes: Please specify side effects                                                    | checkbox <table border="1"> <tr><td>1</td><td>fu_list_side_effects__1</td><td>Drowsiness</td></tr> <tr><td>2</td><td>fu_list_side_effects__2</td><td>Nausea/Vomiting</td></tr> <tr><td>3</td><td>fu_list_side_effects__3</td><td>Abdominal discomfort</td></tr> <tr><td>4</td><td>fu_list_side_effects__4</td><td>Constipation</td></tr> <tr><td>5</td><td>fu_list_side_effects__5</td><td>Dizziness</td></tr> <tr><td>6</td><td>fu_list_side_effects__6</td><td>Confusion</td></tr> <tr><td>7</td><td>fu_list_side_effects__7</td><td>Insomnia/sleeping issues</td></tr> <tr><td>8</td><td>fu_list_side_effects__8</td><td>Itchiness</td></tr> <tr><td>9</td><td>fu_list_side_effects__9</td><td>Difficult urination</td></tr> <tr><td>10</td><td>fu_list_side_effects__10</td><td>Mood swings</td></tr> <tr><td>11</td><td>fu_list_side_effects__11</td><td>Other</td></tr> </table> | 1 | fu_list_side_effects__1   | Drowsiness  | 2  | fu_list_side_effects__2   | Nausea/Vomiting             | 3 | fu_list_side_effects__3   | Abdominal discomfort | 4                 | fu_list_side_effects__4   | Constipation  | 5 | fu_list_side_effects__5   | Dizziness | 6 | fu_list_side_effects__6   | Confusion        | 7 | fu_list_side_effects__7 | Insomnia/sleeping issues | 8 | fu_list_side_effects__8 | Itchiness | 9 | fu_list_side_effects__9 | Difficult urination | 10 | fu_list_side_effects__10 | Mood swings | 11 | fu_list_side_effects__11 | Other |
| 1   | fu_list_side_effects__1                                                                 | Drowsiness                                                                             |                                                                                                                                                                                                                                                                                                                                                                                                                                                                                                                                                                                                                                                                                                                                                                                                                                                                                        |   |                           |             |    |                           |                             |   |                           |                      |                   |                           |               |   |                           |           |   |                           |                  |   |                         |                          |   |                         |           |   |                         |                     |    |                          |             |    |                          |       |
| 2   | fu_list_side_effects__2                                                                 | Nausea/Vomiting                                                                        |                                                                                                                                                                                                                                                                                                                                                                                                                                                                                                                                                                                                                                                                                                                                                                                                                                                                                        |   |                           |             |    |                           |                             |   |                           |                      |                   |                           |               |   |                           |           |   |                           |                  |   |                         |                          |   |                         |           |   |                         |                     |    |                          |             |    |                          |       |
| 3   | fu_list_side_effects__3                                                                 | Abdominal discomfort                                                                   |                                                                                                                                                                                                                                                                                                                                                                                                                                                                                                                                                                                                                                                                                                                                                                                                                                                                                        |   |                           |             |    |                           |                             |   |                           |                      |                   |                           |               |   |                           |           |   |                           |                  |   |                         |                          |   |                         |           |   |                         |                     |    |                          |             |    |                          |       |
| 4   | fu_list_side_effects__4                                                                 | Constipation                                                                           |                                                                                                                                                                                                                                                                                                                                                                                                                                                                                                                                                                                                                                                                                                                                                                                                                                                                                        |   |                           |             |    |                           |                             |   |                           |                      |                   |                           |               |   |                           |           |   |                           |                  |   |                         |                          |   |                         |           |   |                         |                     |    |                          |             |    |                          |       |
| 5   | fu_list_side_effects__5                                                                 | Dizziness                                                                              |                                                                                                                                                                                                                                                                                                                                                                                                                                                                                                                                                                                                                                                                                                                                                                                                                                                                                        |   |                           |             |    |                           |                             |   |                           |                      |                   |                           |               |   |                           |           |   |                           |                  |   |                         |                          |   |                         |           |   |                         |                     |    |                          |             |    |                          |       |
| 6   | fu_list_side_effects__6                                                                 | Confusion                                                                              |                                                                                                                                                                                                                                                                                                                                                                                                                                                                                                                                                                                                                                                                                                                                                                                                                                                                                        |   |                           |             |    |                           |                             |   |                           |                      |                   |                           |               |   |                           |           |   |                           |                  |   |                         |                          |   |                         |           |   |                         |                     |    |                          |             |    |                          |       |
| 7   | fu_list_side_effects__7                                                                 | Insomnia/sleeping issues                                                               |                                                                                                                                                                                                                                                                                                                                                                                                                                                                                                                                                                                                                                                                                                                                                                                                                                                                                        |   |                           |             |    |                           |                             |   |                           |                      |                   |                           |               |   |                           |           |   |                           |                  |   |                         |                          |   |                         |           |   |                         |                     |    |                          |             |    |                          |       |
| 8   | fu_list_side_effects__8                                                                 | Itchiness                                                                              |                                                                                                                                                                                                                                                                                                                                                                                                                                                                                                                                                                                                                                                                                                                                                                                                                                                                                        |   |                           |             |    |                           |                             |   |                           |                      |                   |                           |               |   |                           |           |   |                           |                  |   |                         |                          |   |                         |           |   |                         |                     |    |                          |             |    |                          |       |
| 9   | fu_list_side_effects__9                                                                 | Difficult urination                                                                    |                                                                                                                                                                                                                                                                                                                                                                                                                                                                                                                                                                                                                                                                                                                                                                                                                                                                                        |   |                           |             |    |                           |                             |   |                           |                      |                   |                           |               |   |                           |           |   |                           |                  |   |                         |                          |   |                         |           |   |                         |                     |    |                          |             |    |                          |       |
| 10  | fu_list_side_effects__10                                                                | Mood swings                                                                            |                                                                                                                                                                                                                                                                                                                                                                                                                                                                                                                                                                                                                                                                                                                                                                                                                                                                                        |   |                           |             |    |                           |                             |   |                           |                      |                   |                           |               |   |                           |           |   |                           |                  |   |                         |                          |   |                         |           |   |                         |                     |    |                          |             |    |                          |       |
| 11  | fu_list_side_effects__11                                                                | Other                                                                                  |                                                                                                                                                                                                                                                                                                                                                                                                                                                                                                                                                                                                                                                                                                                                                                                                                                                                                        |   |                           |             |    |                           |                             |   |                           |                      |                   |                           |               |   |                           |           |   |                           |                  |   |                         |                          |   |                         |           |   |                         |                     |    |                          |             |    |                          |       |
| 114 | fu_other_side_effect<br>Show the field ONLY if:<br>[fu_list_side_effects(11)] = '1'     | If other: Please specify                                                               | notes                                                                                                                                                                                                                                                                                                                                                                                                                                                                                                                                                                                                                                                                                                                                                                                                                                                                                  |   |                           |             |    |                           |                             |   |                           |                      |                   |                           |               |   |                           |           |   |                           |                  |   |                         |                          |   |                         |           |   |                         |                     |    |                          |             |    |                          |       |
| 115 | fu_taken_meds_before                                                                    | Had you ever taken any types of these opioid medications before your cesarean section? | radio <table border="1"> <tr><td>1</td><td>Yes</td></tr> <tr><td>2</td><td>No</td></tr> <tr><td>3</td><td>Don't know/doesn't remember</td></tr> <tr><td>4</td><td>Not applicable</td></tr> <tr><td>5</td><td>Did not answer</td></tr> </table>                                                                                                                                                                                                                                                                                                                                                                                                                                                                                                                                                                                                                                         | 1 | Yes                       | 2           | No | 3                         | Don't know/doesn't remember | 4 | Not applicable            | 5                    | Did not answer    |                           |               |   |                           |           |   |                           |                  |   |                         |                          |   |                         |           |   |                         |                     |    |                          |             |    |                          |       |
| 1   | Yes                                                                                     |                                                                                        |                                                                                                                                                                                                                                                                                                                                                                                                                                                                                                                                                                                                                                                                                                                                                                                                                                                                                        |   |                           |             |    |                           |                             |   |                           |                      |                   |                           |               |   |                           |           |   |                           |                  |   |                         |                          |   |                         |           |   |                         |                     |    |                          |             |    |                          |       |
| 2   | No                                                                                      |                                                                                        |                                                                                                                                                                                                                                                                                                                                                                                                                                                                                                                                                                                                                                                                                                                                                                                                                                                                                        |   |                           |             |    |                           |                             |   |                           |                      |                   |                           |               |   |                           |           |   |                           |                  |   |                         |                          |   |                         |           |   |                         |                     |    |                          |             |    |                          |       |
| 3   | Don't know/doesn't remember                                                             |                                                                                        |                                                                                                                                                                                                                                                                                                                                                                                                                                                                                                                                                                                                                                                                                                                                                                                                                                                                                        |   |                           |             |    |                           |                             |   |                           |                      |                   |                           |               |   |                           |           |   |                           |                  |   |                         |                          |   |                         |           |   |                         |                     |    |                          |             |    |                          |       |
| 4   | Not applicable                                                                          |                                                                                        |                                                                                                                                                                                                                                                                                                                                                                                                                                                                                                                                                                                                                                                                                                                                                                                                                                                                                        |   |                           |             |    |                           |                             |   |                           |                      |                   |                           |               |   |                           |           |   |                           |                  |   |                         |                          |   |                         |           |   |                         |                     |    |                          |             |    |                          |       |
| 5   | Did not answer                                                                          |                                                                                        |                                                                                                                                                                                                                                                                                                                                                                                                                                                                                                                                                                                                                                                                                                                                                                                                                                                                                        |   |                           |             |    |                           |                             |   |                           |                      |                   |                           |               |   |                           |           |   |                           |                  |   |                         |                          |   |                         |           |   |                         |                     |    |                          |             |    |                          |       |
| 116 | fu_what_opioids_before<br>Show the field ONLY if:<br>[fu_taken_meds_before] = '1'       | If yes: What opioid medications have you taken before?                                 | checkbox <table border="1"> <tr><td>1</td><td>fu_what_opioids_before__1</td><td>Hydrocodone</td></tr> <tr><td>2</td><td>fu_what_opioids_before__2</td><td>Oxycodone</td></tr> <tr><td>3</td><td>fu_what_opioids_before__3</td><td>Percocet</td></tr> <tr><td>4</td><td>fu_what_opioids_before__4</td><td>Hydromorphone</td></tr> <tr><td>5</td><td>fu_what_opioids_before__5</td><td>Other</td></tr> <tr><td>6</td><td>fu_what_opioids_before__6</td><td>Doesn't remember</td></tr> </table>                                                                                                                                                                                                                                                                                                                                                                                           | 1 | fu_what_opioids_before__1 | Hydrocodone | 2  | fu_what_opioids_before__2 | Oxycodone                   | 3 | fu_what_opioids_before__3 | Percocet             | 4                 | fu_what_opioids_before__4 | Hydromorphone | 5 | fu_what_opioids_before__5 | Other     | 6 | fu_what_opioids_before__6 | Doesn't remember |   |                         |                          |   |                         |           |   |                         |                     |    |                          |             |    |                          |       |
| 1   | fu_what_opioids_before__1                                                               | Hydrocodone                                                                            |                                                                                                                                                                                                                                                                                                                                                                                                                                                                                                                                                                                                                                                                                                                                                                                                                                                                                        |   |                           |             |    |                           |                             |   |                           |                      |                   |                           |               |   |                           |           |   |                           |                  |   |                         |                          |   |                         |           |   |                         |                     |    |                          |             |    |                          |       |
| 2   | fu_what_opioids_before__2                                                               | Oxycodone                                                                              |                                                                                                                                                                                                                                                                                                                                                                                                                                                                                                                                                                                                                                                                                                                                                                                                                                                                                        |   |                           |             |    |                           |                             |   |                           |                      |                   |                           |               |   |                           |           |   |                           |                  |   |                         |                          |   |                         |           |   |                         |                     |    |                          |             |    |                          |       |
| 3   | fu_what_opioids_before__3                                                               | Percocet                                                                               |                                                                                                                                                                                                                                                                                                                                                                                                                                                                                                                                                                                                                                                                                                                                                                                                                                                                                        |   |                           |             |    |                           |                             |   |                           |                      |                   |                           |               |   |                           |           |   |                           |                  |   |                         |                          |   |                         |           |   |                         |                     |    |                          |             |    |                          |       |
| 4   | fu_what_opioids_before__4                                                               | Hydromorphone                                                                          |                                                                                                                                                                                                                                                                                                                                                                                                                                                                                                                                                                                                                                                                                                                                                                                                                                                                                        |   |                           |             |    |                           |                             |   |                           |                      |                   |                           |               |   |                           |           |   |                           |                  |   |                         |                          |   |                         |           |   |                         |                     |    |                          |             |    |                          |       |
| 5   | fu_what_opioids_before__5                                                               | Other                                                                                  |                                                                                                                                                                                                                                                                                                                                                                                                                                                                                                                                                                                                                                                                                                                                                                                                                                                                                        |   |                           |             |    |                           |                             |   |                           |                      |                   |                           |               |   |                           |           |   |                           |                  |   |                         |                          |   |                         |           |   |                         |                     |    |                          |             |    |                          |       |
| 6   | fu_what_opioids_before__6                                                               | Doesn't remember                                                                       |                                                                                                                                                                                                                                                                                                                                                                                                                                                                                                                                                                                                                                                                                                                                                                                                                                                                                        |   |                           |             |    |                           |                             |   |                           |                      |                   |                           |               |   |                           |           |   |                           |                  |   |                         |                          |   |                         |           |   |                         |                     |    |                          |             |    |                          |       |
| 117 | fu_other_opioids_before<br>Show the field ONLY if:<br>[fu_what_opioids_before(5)] = '1' | If other: Please specify                                                               | notes                                                                                                                                                                                                                                                                                                                                                                                                                                                                                                                                                                                                                                                                                                                                                                                                                                                                                  |   |                           |             |    |                           |                             |   |                           |                      |                   |                           |               |   |                           |           |   |                           |                  |   |                         |                          |   |                         |           |   |                         |                     |    |                          |             |    |                          |       |

Bateman BT, Cole NM, Maeda A, Burns SM, Houle TT, Huybrechts KF, et al. Patterns of opioid prescription and use after cesarean delivery. *Obstet Gynecol* 2017; 130.

The authors provided this information as a supplement to their article.

©2017 American College of Obstetricians and Gynecologists.

|     |                                                                                          |                                                                                                                                                                                                                                                                                                                                                                                                     |                                                                                                                                                                                                                                                                                                                                                                                                                                                                                                                 |   |                            |                  |    |                            |                         |   |                            |                        |                |                            |       |   |                            |                       |
|-----|------------------------------------------------------------------------------------------|-----------------------------------------------------------------------------------------------------------------------------------------------------------------------------------------------------------------------------------------------------------------------------------------------------------------------------------------------------------------------------------------------------|-----------------------------------------------------------------------------------------------------------------------------------------------------------------------------------------------------------------------------------------------------------------------------------------------------------------------------------------------------------------------------------------------------------------------------------------------------------------------------------------------------------------|---|----------------------------|------------------|----|----------------------------|-------------------------|---|----------------------------|------------------------|----------------|----------------------------|-------|---|----------------------------|-----------------------|
| 118 | fu_reasons_taken_before<br>Show the field ONLY if:<br>[fu_taken_meds_before] = '1'       | If yes: For what reasons did you take these opioid pain medications previously?                                                                                                                                                                                                                                                                                                                     | checkbox<br><table border="1" data-bbox="797 226 1580 457"> <tr> <td>1</td> <td>fu_reasons_taken_before__1</td> <td>Previous surgery</td> </tr> <tr> <td>2</td> <td>fu_reasons_taken_before__2</td> <td>History of chronic pain</td> </tr> <tr> <td>3</td> <td>fu_reasons_taken_before__3</td> <td>Previous injury/trauma</td> </tr> <tr> <td>4</td> <td>fu_reasons_taken_before__4</td> <td>Other</td> </tr> <tr> <td>5</td> <td>fu_reasons_taken_before__5</td> <td>Doesn't know/remember</td> </tr> </table> | 1 | fu_reasons_taken_before__1 | Previous surgery | 2  | fu_reasons_taken_before__2 | History of chronic pain | 3 | fu_reasons_taken_before__3 | Previous injury/trauma | 4              | fu_reasons_taken_before__4 | Other | 5 | fu_reasons_taken_before__5 | Doesn't know/remember |
| 1   | fu_reasons_taken_before__1                                                               | Previous surgery                                                                                                                                                                                                                                                                                                                                                                                    |                                                                                                                                                                                                                                                                                                                                                                                                                                                                                                                 |   |                            |                  |    |                            |                         |   |                            |                        |                |                            |       |   |                            |                       |
| 2   | fu_reasons_taken_before__2                                                               | History of chronic pain                                                                                                                                                                                                                                                                                                                                                                             |                                                                                                                                                                                                                                                                                                                                                                                                                                                                                                                 |   |                            |                  |    |                            |                         |   |                            |                        |                |                            |       |   |                            |                       |
| 3   | fu_reasons_taken_before__3                                                               | Previous injury/trauma                                                                                                                                                                                                                                                                                                                                                                              |                                                                                                                                                                                                                                                                                                                                                                                                                                                                                                                 |   |                            |                  |    |                            |                         |   |                            |                        |                |                            |       |   |                            |                       |
| 4   | fu_reasons_taken_before__4                                                               | Other                                                                                                                                                                                                                                                                                                                                                                                               |                                                                                                                                                                                                                                                                                                                                                                                                                                                                                                                 |   |                            |                  |    |                            |                         |   |                            |                        |                |                            |       |   |                            |                       |
| 5   | fu_reasons_taken_before__5                                                               | Doesn't know/remember                                                                                                                                                                                                                                                                                                                                                                               |                                                                                                                                                                                                                                                                                                                                                                                                                                                                                                                 |   |                            |                  |    |                            |                         |   |                            |                        |                |                            |       |   |                            |                       |
| 119 | fu_other_reasons_before<br>Show the field ONLY if:<br>[fu_reasons_taken_before(4)] = '1' | If other: Please specify                                                                                                                                                                                                                                                                                                                                                                            | notes                                                                                                                                                                                                                                                                                                                                                                                                                                                                                                           |   |                            |                  |    |                            |                         |   |                            |                        |                |                            |       |   |                            |                       |
| 120 | fu_how_often_before<br>Show the field ONLY if:<br>[fu_taken_meds_before] = '1'           | If yes: For how long (estimated per day)?                                                                                                                                                                                                                                                                                                                                                           | notes                                                                                                                                                                                                                                                                                                                                                                                                                                                                                                           |   |                            |                  |    |                            |                         |   |                            |                        |                |                            |       |   |                            |                       |
| 121 | fu_how_long_before<br>Show the field ONLY if:<br>[fu_taken_meds_before] = '1'            | If yes: For how long (estimated by day)?                                                                                                                                                                                                                                                                                                                                                            | notes                                                                                                                                                                                                                                                                                                                                                                                                                                                                                                           |   |                            |                  |    |                            |                         |   |                            |                        |                |                            |       |   |                            |                       |
| 122 | fu_other_meds_taken                                                                      | Did you take any other medications for your pain related to CS after the surgery?                                                                                                                                                                                                                                                                                                                   | radio<br><table border="1" data-bbox="797 831 1055 1062"> <tr> <td>1</td> <td>Yes</td> </tr> <tr> <td>2</td> <td>No</td> </tr> <tr> <td>3</td> <td>Don't know</td> </tr> <tr> <td>4</td> <td>Not applicable</td> </tr> <tr> <td>5</td> <td>Did not answer</td> </tr> </table>                                                                                                                                                                                                                                   | 1 | Yes                        | 2                | No | 3                          | Don't know              | 4 | Not applicable             | 5                      | Did not answer |                            |       |   |                            |                       |
| 1   | Yes                                                                                      |                                                                                                                                                                                                                                                                                                                                                                                                     |                                                                                                                                                                                                                                                                                                                                                                                                                                                                                                                 |   |                            |                  |    |                            |                         |   |                            |                        |                |                            |       |   |                            |                       |
| 2   | No                                                                                       |                                                                                                                                                                                                                                                                                                                                                                                                     |                                                                                                                                                                                                                                                                                                                                                                                                                                                                                                                 |   |                            |                  |    |                            |                         |   |                            |                        |                |                            |       |   |                            |                       |
| 3   | Don't know                                                                               |                                                                                                                                                                                                                                                                                                                                                                                                     |                                                                                                                                                                                                                                                                                                                                                                                                                                                                                                                 |   |                            |                  |    |                            |                         |   |                            |                        |                |                            |       |   |                            |                       |
| 4   | Not applicable                                                                           |                                                                                                                                                                                                                                                                                                                                                                                                     |                                                                                                                                                                                                                                                                                                                                                                                                                                                                                                                 |   |                            |                  |    |                            |                         |   |                            |                        |                |                            |       |   |                            |                       |
| 5   | Did not answer                                                                           |                                                                                                                                                                                                                                                                                                                                                                                                     |                                                                                                                                                                                                                                                                                                                                                                                                                                                                                                                 |   |                            |                  |    |                            |                         |   |                            |                        |                |                            |       |   |                            |                       |
| 123 | fu_list_other_meds<br>Show the field ONLY if:<br>[fu_other_meds_taken] = '1'             | If yes: Check all other medications taken that apply                                                                                                                                                                                                                                                                                                                                                | checkbox<br><table border="1" data-bbox="797 1108 1497 1289"> <tr> <td>1</td> <td>fu_list_other_meds__1</td> <td>Tylenol</td> </tr> <tr> <td>2</td> <td>fu_list_other_meds__2</td> <td>Ibuprofen/Motrin/Advil</td> </tr> <tr> <td>3</td> <td>fu_list_other_meds__3</td> <td>Naproxen/Aleve</td> </tr> <tr> <td>4</td> <td>fu_list_other_meds__4</td> <td>Other</td> </tr> </table>                                                                                                                              | 1 | fu_list_other_meds__1      | Tylenol          | 2  | fu_list_other_meds__2      | Ibuprofen/Motrin/Advil  | 3 | fu_list_other_meds__3      | Naproxen/Aleve         | 4              | fu_list_other_meds__4      | Other |   |                            |                       |
| 1   | fu_list_other_meds__1                                                                    | Tylenol                                                                                                                                                                                                                                                                                                                                                                                             |                                                                                                                                                                                                                                                                                                                                                                                                                                                                                                                 |   |                            |                  |    |                            |                         |   |                            |                        |                |                            |       |   |                            |                       |
| 2   | fu_list_other_meds__2                                                                    | Ibuprofen/Motrin/Advil                                                                                                                                                                                                                                                                                                                                                                              |                                                                                                                                                                                                                                                                                                                                                                                                                                                                                                                 |   |                            |                  |    |                            |                         |   |                            |                        |                |                            |       |   |                            |                       |
| 3   | fu_list_other_meds__3                                                                    | Naproxen/Aleve                                                                                                                                                                                                                                                                                                                                                                                      |                                                                                                                                                                                                                                                                                                                                                                                                                                                                                                                 |   |                            |                  |    |                            |                         |   |                            |                        |                |                            |       |   |                            |                       |
| 4   | fu_list_other_meds__4                                                                    | Other                                                                                                                                                                                                                                                                                                                                                                                               |                                                                                                                                                                                                                                                                                                                                                                                                                                                                                                                 |   |                            |                  |    |                            |                         |   |                            |                        |                |                            |       |   |                            |                       |
| 124 | fu_list_other_med<br>Show the field ONLY if:<br>[fu_list_other_meds(4)] = '1'            | If other: Please specify                                                                                                                                                                                                                                                                                                                                                                            | notes                                                                                                                                                                                                                                                                                                                                                                                                                                                                                                           |   |                            |                  |    |                            |                         |   |                            |                        |                |                            |       |   |                            |                       |
| 125 | fu_participate_study_one                                                                 | Can you tell us if you would have been willing to participate if the following study were underway at the time you delivered?<br>Study 1: A "randomized trial" in which we will assign you by equal chance (like a coin toss) to one of two study groups: The group discharged on the standard amount of pain medication or the group discharged with a more limited supply, but with the option to | radio<br><table border="1" data-bbox="797 1440 1055 1621"> <tr> <td>1</td> <td>Yes</td> </tr> <tr> <td>2</td> <td>No</td> </tr> <tr> <td>3</td> <td>Don't know</td> </tr> <tr> <td>4</td> <td>Did not answer</td> </tr> </table>                                                                                                                                                                                                                                                                                | 1 | Yes                        | 2                | No | 3                          | Don't know              | 4 | Did not answer             |                        |                |                            |       |   |                            |                       |
| 1   | Yes                                                                                      |                                                                                                                                                                                                                                                                                                                                                                                                     |                                                                                                                                                                                                                                                                                                                                                                                                                                                                                                                 |   |                            |                  |    |                            |                         |   |                            |                        |                |                            |       |   |                            |                       |
| 2   | No                                                                                       |                                                                                                                                                                                                                                                                                                                                                                                                     |                                                                                                                                                                                                                                                                                                                                                                                                                                                                                                                 |   |                            |                  |    |                            |                         |   |                            |                        |                |                            |       |   |                            |                       |
| 3   | Don't know                                                                               |                                                                                                                                                                                                                                                                                                                                                                                                     |                                                                                                                                                                                                                                                                                                                                                                                                                                                                                                                 |   |                            |                  |    |                            |                         |   |                            |                        |                |                            |       |   |                            |                       |
| 4   | Did not answer                                                                           |                                                                                                                                                                                                                                                                                                                                                                                                     |                                                                                                                                                                                                                                                                                                                                                                                                                                                                                                                 |   |                            |                  |    |                            |                         |   |                            |                        |                |                            |       |   |                            |                       |

Bateman BT, Cole NM, Maeda A, Burns SM, Houle TT, Huybrechts KF, et al. Patterns of opioid prescription and use after cesarean delivery. *Obstet Gynecol* 2017; 130.

The authors provided this information as a supplement to their article.

©2017 American College of Obstetricians and Gynecologists.

|     |                                                                                                                                                                       |                                                                                                                                                                                                                                                                                                                                                                                                                                                                                               |                                                                                                                                                                                                   |   |            |   |            |   |            |   |                |
|-----|-----------------------------------------------------------------------------------------------------------------------------------------------------------------------|-----------------------------------------------------------------------------------------------------------------------------------------------------------------------------------------------------------------------------------------------------------------------------------------------------------------------------------------------------------------------------------------------------------------------------------------------------------------------------------------------|---------------------------------------------------------------------------------------------------------------------------------------------------------------------------------------------------|---|------------|---|------------|---|------------|---|----------------|
|     |                                                                                                                                                                       | refill?                                                                                                                                                                                                                                                                                                                                                                                                                                                                                       |                                                                                                                                                                                                   |   |            |   |            |   |            |   |                |
| 126 | fu_no_study_one_why<br>Show the field ONLY if:<br>[fu_participate_study_two] = '2'<br>or [fu_participate_study_two] =<br>'3' or [fu_participate_study_two]<br>= '4'   | If no: Why not?<br><i>Suggested standardized<br/>language for some common<br/>reasons: "inconvenience",<br/>"needed opioids", "fear of<br/>breakthrough pain", "doesn't<br/>participate in research studies",<br/>"doesn't use opioids"</i>                                                                                                                                                                                                                                                   | notes                                                                                                                                                                                             |   |            |   |            |   |            |   |                |
| 127 | fu_participate_study_two                                                                                                                                              | Can you tell us if you would<br>have been willing to participate if<br>the following study were<br>underway at the time you<br>delivered?<br>Study 2: A "randomized trial" in<br>which we will assign you by<br>equal chance (like a coin toss) to<br>one of two study groups: The<br>group discharged on the<br>standard amount of pain<br>medication or the group<br>discharged with no opioid<br>medication (but with instructions<br>to use either tylenol and/or<br>ibuprofen for pain?) | radio<br><table border="1"> <tr> <td>1</td> <td>Yes</td> </tr> <tr> <td>2</td> <td>No</td> </tr> <tr> <td>3</td> <td>Don't know</td> </tr> <tr> <td>4</td> <td>Did not answer</td> </tr> </table> | 1 | Yes        | 2 | No         | 3 | Don't know | 4 | Did not answer |
| 1   | Yes                                                                                                                                                                   |                                                                                                                                                                                                                                                                                                                                                                                                                                                                                               |                                                                                                                                                                                                   |   |            |   |            |   |            |   |                |
| 2   | No                                                                                                                                                                    |                                                                                                                                                                                                                                                                                                                                                                                                                                                                                               |                                                                                                                                                                                                   |   |            |   |            |   |            |   |                |
| 3   | Don't know                                                                                                                                                            |                                                                                                                                                                                                                                                                                                                                                                                                                                                                                               |                                                                                                                                                                                                   |   |            |   |            |   |            |   |                |
| 4   | Did not answer                                                                                                                                                        |                                                                                                                                                                                                                                                                                                                                                                                                                                                                                               |                                                                                                                                                                                                   |   |            |   |            |   |            |   |                |
| 128 | fu_no_study_two_why<br>Show the field ONLY if:<br>[fu_participate_study_two] = '2'<br>and [fu_participate_study_two] =<br>'3' and<br>[fu_participate_study_two] = '4' | If not: Why not?<br><i>Suggested standardized<br/>language for some common<br/>reasons: "inconvenience",<br/>"needed opioids", "fear of<br/>breakthrough pain", "doesn't<br/>participate in research studies",<br/>"doesn't use opioids"</i>                                                                                                                                                                                                                                                  | notes                                                                                                                                                                                             |   |            |   |            |   |            |   |                |
| 129 | fu_other_comments_study_1                                                                                                                                             | Other comments?                                                                                                                                                                                                                                                                                                                                                                                                                                                                               | notes                                                                                                                                                                                             |   |            |   |            |   |            |   |                |
| 130 | followup_survey_data_collection<br>_form_opioid_med_po_complet<br>e                                                                                                   | Complete?                                                                                                                                                                                                                                                                                                                                                                                                                                                                                     | dropdown<br><table border="1"> <tr> <td>0</td> <td>Incomplete</td> </tr> <tr> <td>1</td> <td>Unverified</td> </tr> <tr> <td>2</td> <td>Complete</td> </tr> </table>                               | 0 | Incomplete | 1 | Unverified | 2 | Complete   |   |                |
| 0   | Incomplete                                                                                                                                                            |                                                                                                                                                                                                                                                                                                                                                                                                                                                                                               |                                                                                                                                                                                                   |   |            |   |            |   |            |   |                |
| 1   | Unverified                                                                                                                                                            |                                                                                                                                                                                                                                                                                                                                                                                                                                                                                               |                                                                                                                                                                                                   |   |            |   |            |   |            |   |                |
| 2   | Complete                                                                                                                                                              |                                                                                                                                                                                                                                                                                                                                                                                                                                                                                               |                                                                                                                                                                                                   |   |            |   |            |   |            |   |                |

**Instrument: MEDICAL RECORD Data Collection Form Opioid Med Post CS Study**

|     |                      |                                                                                      |                            |
|-----|----------------------|--------------------------------------------------------------------------------------|----------------------------|
| 131 | patient_id           | Study ID                                                                             | text, Required, Identifier |
| 132 | los_admiss_dc        | Length of Hospital Stay:<br>Admission date to procedure<br>date (days)               | text                       |
| 133 | los_proced_dc        | Length of Hospital Stay:<br>Procedure date to discharge<br>date (days)               | text                       |
| 134 | days_hospitalization | Total Length of Hospital Stay:<br>Admission date to discharge to<br>home date (days) | text, Required             |

Bateman BT, Cole NM, Maeda A, Burns SM, Houle TT, Huybrechts KF, et al. Patterns of opioid prescription and use after cesarean delivery. *Obstet Gynecol* 2017; 130.

The authors provided this information as a supplement to their article.

©2017 American College of Obstetricians and Gynecologists.

|     |                                                                                     |                                                                                                                                                                                                                                                                                                                                                                                                                                                                                                                                                                                                                                                                                                                                                                                                                                                                                                                                                                                                                                                                                                                                                                               |                                                                                                                                                                                                                                                                                                                                                                                                                                                                                                                                                                  |   |                              |                                |                    |                    |                                       |   |                    |                     |      |                    |                                       |   |                    |       |   |                    |         |
|-----|-------------------------------------------------------------------------------------|-------------------------------------------------------------------------------------------------------------------------------------------------------------------------------------------------------------------------------------------------------------------------------------------------------------------------------------------------------------------------------------------------------------------------------------------------------------------------------------------------------------------------------------------------------------------------------------------------------------------------------------------------------------------------------------------------------------------------------------------------------------------------------------------------------------------------------------------------------------------------------------------------------------------------------------------------------------------------------------------------------------------------------------------------------------------------------------------------------------------------------------------------------------------------------|------------------------------------------------------------------------------------------------------------------------------------------------------------------------------------------------------------------------------------------------------------------------------------------------------------------------------------------------------------------------------------------------------------------------------------------------------------------------------------------------------------------------------------------------------------------|---|------------------------------|--------------------------------|--------------------|--------------------|---------------------------------------|---|--------------------|---------------------|------|--------------------|---------------------------------------|---|--------------------|-------|---|--------------------|---------|
| 135 | age_in_years                                                                        | Age (years)                                                                                                                                                                                                                                                                                                                                                                                                                                                                                                                                                                                                                                                                                                                                                                                                                                                                                                                                                                                                                                                                                                                                                                   | text, Required, Identifier                                                                                                                                                                                                                                                                                                                                                                                                                                                                                                                                       |   |                              |                                |                    |                    |                                       |   |                    |                     |      |                    |                                       |   |                    |       |   |                    |         |
| 136 | race_ethnicity                                                                      | <b>Race-Ethnicity</b><br><i>Note: Please check all that apply. 1. Caucasian: A person having origins in any of the original peoples of Europe, the Middle East, or North Africa. 2. African American: A person having origins in any of the Black racial groups of Africa. 3. Hispanic: A person of Cuban, Mexican, Puerto Rican, South or Central American, or other Spanish culture or origin, regardless of race. 4. Asian: A person having origins in any of the original peoples of the Far East, Southeast Asia, or the Indian subcontinent including, for example, Cambodia, China, India, Japan, Korea, Malaysia, Pakistan, the Philippine Islands, Thailand, and Vietnam. (Note: Individuals from the Philippine Islands have been recorded as Pacific Islanders in previous data collection strategies.) 5. American Indian or Alaska Native: A person having origins in any of the original peoples of North, Central, or South America, and who maintains tribal affiliations or community attachment. 6. Native Hawaiian or Other Pacific Islander: A person having origins in any of the original peoples of Hawaii, Guam, Samoa, or other Pacific Islands.</i> | checkbox, Required<br><table border="1"> <tr> <td>1</td> <td>race_ethnicity___1</td> <td>White-Caucasian (non-Hispanic)</td> </tr> <tr> <td>2</td> <td>race_ethnicity___2</td> <td>Black/African American (non-Hispanic)</td> </tr> <tr> <td>3</td> <td>race_ethnicity___3</td> <td>Hispanic (any race)</td> </tr> <tr> <td>4</td> <td>race_ethnicity___4</td> <td>Asian/Pacific Islander (non-Hispanic)</td> </tr> <tr> <td>5</td> <td>race_ethnicity___5</td> <td>Other</td> </tr> <tr> <td>6</td> <td>race_ethnicity___6</td> <td>Unknown</td> </tr> </table> | 1 | race_ethnicity___1           | White-Caucasian (non-Hispanic) | 2                  | race_ethnicity___2 | Black/African American (non-Hispanic) | 3 | race_ethnicity___3 | Hispanic (any race) | 4    | race_ethnicity___4 | Asian/Pacific Islander (non-Hispanic) | 5 | race_ethnicity___5 | Other | 6 | race_ethnicity___6 | Unknown |
| 1   | race_ethnicity___1                                                                  | White-Caucasian (non-Hispanic)                                                                                                                                                                                                                                                                                                                                                                                                                                                                                                                                                                                                                                                                                                                                                                                                                                                                                                                                                                                                                                                                                                                                                |                                                                                                                                                                                                                                                                                                                                                                                                                                                                                                                                                                  |   |                              |                                |                    |                    |                                       |   |                    |                     |      |                    |                                       |   |                    |       |   |                    |         |
| 2   | race_ethnicity___2                                                                  | Black/African American (non-Hispanic)                                                                                                                                                                                                                                                                                                                                                                                                                                                                                                                                                                                                                                                                                                                                                                                                                                                                                                                                                                                                                                                                                                                                         |                                                                                                                                                                                                                                                                                                                                                                                                                                                                                                                                                                  |   |                              |                                |                    |                    |                                       |   |                    |                     |      |                    |                                       |   |                    |       |   |                    |         |
| 3   | race_ethnicity___3                                                                  | Hispanic (any race)                                                                                                                                                                                                                                                                                                                                                                                                                                                                                                                                                                                                                                                                                                                                                                                                                                                                                                                                                                                                                                                                                                                                                           |                                                                                                                                                                                                                                                                                                                                                                                                                                                                                                                                                                  |   |                              |                                |                    |                    |                                       |   |                    |                     |      |                    |                                       |   |                    |       |   |                    |         |
| 4   | race_ethnicity___4                                                                  | Asian/Pacific Islander (non-Hispanic)                                                                                                                                                                                                                                                                                                                                                                                                                                                                                                                                                                                                                                                                                                                                                                                                                                                                                                                                                                                                                                                                                                                                         |                                                                                                                                                                                                                                                                                                                                                                                                                                                                                                                                                                  |   |                              |                                |                    |                    |                                       |   |                    |                     |      |                    |                                       |   |                    |       |   |                    |         |
| 5   | race_ethnicity___5                                                                  | Other                                                                                                                                                                                                                                                                                                                                                                                                                                                                                                                                                                                                                                                                                                                                                                                                                                                                                                                                                                                                                                                                                                                                                                         |                                                                                                                                                                                                                                                                                                                                                                                                                                                                                                                                                                  |   |                              |                                |                    |                    |                                       |   |                    |                     |      |                    |                                       |   |                    |       |   |                    |         |
| 6   | race_ethnicity___6                                                                  | Unknown                                                                                                                                                                                                                                                                                                                                                                                                                                                                                                                                                                                                                                                                                                                                                                                                                                                                                                                                                                                                                                                                                                                                                                       |                                                                                                                                                                                                                                                                                                                                                                                                                                                                                                                                                                  |   |                              |                                |                    |                    |                                       |   |                    |                     |      |                    |                                       |   |                    |       |   |                    |         |
| 137 | specify_other_race<br>Show the field ONLY if:<br>[ <i>race_ethnicity</i> (5)] = '1' | Specify "Other":                                                                                                                                                                                                                                                                                                                                                                                                                                                                                                                                                                                                                                                                                                                                                                                                                                                                                                                                                                                                                                                                                                                                                              | text                                                                                                                                                                                                                                                                                                                                                                                                                                                                                                                                                             |   |                              |                                |                    |                    |                                       |   |                    |                     |      |                    |                                       |   |                    |       |   |                    |         |
| 138 | insurance_coverage                                                                  | <b>Insurance Coverage</b><br><i>Note: "Medicaid" prefers to any public health insurance-- If the plan is public insurance, then please check Medicaid. Some medicaid products may be commercial</i>                                                                                                                                                                                                                                                                                                                                                                                                                                                                                                                                                                                                                                                                                                                                                                                                                                                                                                                                                                           | radio, Required<br><table border="1"> <tr> <td>1</td> <td>Medicaid (commercial or not)</td> </tr> <tr> <td>2</td> <td>Commercial/Private</td> </tr> <tr> <td>3</td> <td>Unknown</td> </tr> <tr> <td>4</td> <td>Other</td> </tr> <tr> <td>5</td> <td>None</td> </tr> </table>                                                                                                                                                                                                                                                                                     | 1 | Medicaid (commercial or not) | 2                              | Commercial/Private | 3                  | Unknown                               | 4 | Other              | 5                   | None |                    |                                       |   |                    |       |   |                    |         |
| 1   | Medicaid (commercial or not)                                                        |                                                                                                                                                                                                                                                                                                                                                                                                                                                                                                                                                                                                                                                                                                                                                                                                                                                                                                                                                                                                                                                                                                                                                                               |                                                                                                                                                                                                                                                                                                                                                                                                                                                                                                                                                                  |   |                              |                                |                    |                    |                                       |   |                    |                     |      |                    |                                       |   |                    |       |   |                    |         |
| 2   | Commercial/Private                                                                  |                                                                                                                                                                                                                                                                                                                                                                                                                                                                                                                                                                                                                                                                                                                                                                                                                                                                                                                                                                                                                                                                                                                                                                               |                                                                                                                                                                                                                                                                                                                                                                                                                                                                                                                                                                  |   |                              |                                |                    |                    |                                       |   |                    |                     |      |                    |                                       |   |                    |       |   |                    |         |
| 3   | Unknown                                                                             |                                                                                                                                                                                                                                                                                                                                                                                                                                                                                                                                                                                                                                                                                                                                                                                                                                                                                                                                                                                                                                                                                                                                                                               |                                                                                                                                                                                                                                                                                                                                                                                                                                                                                                                                                                  |   |                              |                                |                    |                    |                                       |   |                    |                     |      |                    |                                       |   |                    |       |   |                    |         |
| 4   | Other                                                                               |                                                                                                                                                                                                                                                                                                                                                                                                                                                                                                                                                                                                                                                                                                                                                                                                                                                                                                                                                                                                                                                                                                                                                                               |                                                                                                                                                                                                                                                                                                                                                                                                                                                                                                                                                                  |   |                              |                                |                    |                    |                                       |   |                    |                     |      |                    |                                       |   |                    |       |   |                    |         |
| 5   | None                                                                                |                                                                                                                                                                                                                                                                                                                                                                                                                                                                                                                                                                                                                                                                                                                                                                                                                                                                                                                                                                                                                                                                                                                                                                               |                                                                                                                                                                                                                                                                                                                                                                                                                                                                                                                                                                  |   |                              |                                |                    |                    |                                       |   |                    |                     |      |                    |                                       |   |                    |       |   |                    |         |
| 139 | other_insurance<br>Show the field ONLY if:<br>[ <i>insurance_coverage</i> ] = '4'   | If other insurance, please specify:                                                                                                                                                                                                                                                                                                                                                                                                                                                                                                                                                                                                                                                                                                                                                                                                                                                                                                                                                                                                                                                                                                                                           | text                                                                                                                                                                                                                                                                                                                                                                                                                                                                                                                                                             |   |                              |                                |                    |                    |                                       |   |                    |                     |      |                    |                                       |   |                    |       |   |                    |         |

Bateman BT, Cole NM, Maeda A, Burns SM, Houle TT, Huybrechts KF, et al. Patterns of opioid prescription and use after cesarean delivery. *Obstet Gynecol* 2017; 130.

The authors provided this information as a supplement to their article.

©2017 American College of Obstetricians and Gynecologists.

|     |                                                                                                                    |                                                                                                          |                                                                                                                                                                                                                                                                 |   |                      |                  |    |                      |                  |   |                      |            |
|-----|--------------------------------------------------------------------------------------------------------------------|----------------------------------------------------------------------------------------------------------|-----------------------------------------------------------------------------------------------------------------------------------------------------------------------------------------------------------------------------------------------------------------|---|----------------------|------------------|----|----------------------|------------------|---|----------------------|------------|
| 140 | pt_hx_opioid_abuse                                                                                                 | Patient History of Chronic Opioid Use/Abuse                                                              | radio<br><table border="1"> <tr><td>1</td><td>Yes</td></tr> <tr><td>2</td><td>No</td></tr> <tr><td>3</td><td>Unknown/NA</td></tr> </table>                                                                                                                      | 1 | Yes                  | 2                | No | 3                    | Unknown/NA       |   |                      |            |
| 1   | Yes                                                                                                                |                                                                                                          |                                                                                                                                                                                                                                                                 |   |                      |                  |    |                      |                  |   |                      |            |
| 2   | No                                                                                                                 |                                                                                                          |                                                                                                                                                                                                                                                                 |   |                      |                  |    |                      |                  |   |                      |            |
| 3   | Unknown/NA                                                                                                         |                                                                                                          |                                                                                                                                                                                                                                                                 |   |                      |                  |    |                      |                  |   |                      |            |
| 141 | chronic_opioid_specified<br>Show the field ONLY if:<br>[pt_hx_opioid_abuse] = '1' or<br>[pt_hx_opioid_abuse] = '3' | Specify type/details of opioid use/abuse                                                                 | notes                                                                                                                                                                                                                                                           |   |                      |                  |    |                      |                  |   |                      |            |
| 142 | when_opioid_abuse<br>Show the field ONLY if:<br>[pt_hx_opioid_abuse] = '1' or<br>[pt_hx_opioid_abuse] = '3'        | If yes: When?                                                                                            | checkbox<br><table border="1"> <tr><td>1</td><td>when_opioid_abuse__1</td><td>Before Pregnancy</td></tr> <tr><td>2</td><td>when_opioid_abuse__2</td><td>During Pregnancy</td></tr> <tr><td>3</td><td>when_opioid_abuse__3</td><td>Unknown/NA</td></tr> </table> | 1 | when_opioid_abuse__1 | Before Pregnancy | 2  | when_opioid_abuse__2 | During Pregnancy | 3 | when_opioid_abuse__3 | Unknown/NA |
| 1   | when_opioid_abuse__1                                                                                               | Before Pregnancy                                                                                         |                                                                                                                                                                                                                                                                 |   |                      |                  |    |                      |                  |   |                      |            |
| 2   | when_opioid_abuse__2                                                                                               | During Pregnancy                                                                                         |                                                                                                                                                                                                                                                                 |   |                      |                  |    |                      |                  |   |                      |            |
| 3   | when_opioid_abuse__3                                                                                               | Unknown/NA                                                                                               |                                                                                                                                                                                                                                                                 |   |                      |                  |    |                      |                  |   |                      |            |
| 143 | pt_hx_smoking                                                                                                      | Patient History of Other Substance Abuse: Smoking?                                                       | radio, Required<br><table border="1"> <tr><td>1</td><td>Yes</td></tr> <tr><td>2</td><td>No</td></tr> <tr><td>3</td><td>Unknown/NA</td></tr> </table>                                                                                                            | 1 | Yes                  | 2                | No | 3                    | Unknown/NA       |   |                      |            |
| 1   | Yes                                                                                                                |                                                                                                          |                                                                                                                                                                                                                                                                 |   |                      |                  |    |                      |                  |   |                      |            |
| 2   | No                                                                                                                 |                                                                                                          |                                                                                                                                                                                                                                                                 |   |                      |                  |    |                      |                  |   |                      |            |
| 3   | Unknown/NA                                                                                                         |                                                                                                          |                                                                                                                                                                                                                                                                 |   |                      |                  |    |                      |                  |   |                      |            |
| 144 | smoking_timing<br>Show the field ONLY if:<br>[pt_hx_smoking] = '1'                                                 | If yes: When?                                                                                            | checkbox<br><table border="1"> <tr><td>1</td><td>smoking_timing__1</td><td>Before Pregnancy</td></tr> <tr><td>2</td><td>smoking_timing__2</td><td>During Pregnancy</td></tr> <tr><td>3</td><td>smoking_timing__3</td><td>Unknown/NA</td></tr> </table>          | 1 | smoking_timing__1    | Before Pregnancy | 2  | smoking_timing__2    | During Pregnancy | 3 | smoking_timing__3    | Unknown/NA |
| 1   | smoking_timing__1                                                                                                  | Before Pregnancy                                                                                         |                                                                                                                                                                                                                                                                 |   |                      |                  |    |                      |                  |   |                      |            |
| 2   | smoking_timing__2                                                                                                  | During Pregnancy                                                                                         |                                                                                                                                                                                                                                                                 |   |                      |                  |    |                      |                  |   |                      |            |
| 3   | smoking_timing__3                                                                                                  | Unknown/NA                                                                                               |                                                                                                                                                                                                                                                                 |   |                      |                  |    |                      |                  |   |                      |            |
| 145 | smoking_hist_comments                                                                                              | Comments about smoking history:<br><i>Please write "NA" if never smoked</i>                              | notes                                                                                                                                                                                                                                                           |   |                      |                  |    |                      |                  |   |                      |            |
| 146 | pt_hx_alcohol                                                                                                      | Patient History of Other Substance Abuse: Alcohol Abuse?                                                 | radio, Required<br><table border="1"> <tr><td>1</td><td>Yes</td></tr> <tr><td>2</td><td>No</td></tr> <tr><td>3</td><td>Unknown/NA</td></tr> </table>                                                                                                            | 1 | Yes                  | 2                | No | 3                    | Unknown/NA       |   |                      |            |
| 1   | Yes                                                                                                                |                                                                                                          |                                                                                                                                                                                                                                                                 |   |                      |                  |    |                      |                  |   |                      |            |
| 2   | No                                                                                                                 |                                                                                                          |                                                                                                                                                                                                                                                                 |   |                      |                  |    |                      |                  |   |                      |            |
| 3   | Unknown/NA                                                                                                         |                                                                                                          |                                                                                                                                                                                                                                                                 |   |                      |                  |    |                      |                  |   |                      |            |
| 147 | alcohol_timing<br>Show the field ONLY if:<br>[pt_hx_alcohol] = '1'                                                 | If yes: When?                                                                                            | checkbox<br><table border="1"> <tr><td>1</td><td>alcohol_timing__1</td><td>Before pregnancy</td></tr> <tr><td>2</td><td>alcohol_timing__2</td><td>During pregnancy</td></tr> <tr><td>3</td><td>alcohol_timing__3</td><td>Unknown/NA</td></tr> </table>          | 1 | alcohol_timing__1    | Before pregnancy | 2  | alcohol_timing__2    | During pregnancy | 3 | alcohol_timing__3    | Unknown/NA |
| 1   | alcohol_timing__1                                                                                                  | Before pregnancy                                                                                         |                                                                                                                                                                                                                                                                 |   |                      |                  |    |                      |                  |   |                      |            |
| 2   | alcohol_timing__2                                                                                                  | During pregnancy                                                                                         |                                                                                                                                                                                                                                                                 |   |                      |                  |    |                      |                  |   |                      |            |
| 3   | alcohol_timing__3                                                                                                  | Unknown/NA                                                                                               |                                                                                                                                                                                                                                                                 |   |                      |                  |    |                      |                  |   |                      |            |
| 148 | etoh_use_comments                                                                                                  | Comments about alcohol use/abuse history:<br><i>Please write "NA" if no significant drinking history</i> | notes                                                                                                                                                                                                                                                           |   |                      |                  |    |                      |                  |   |                      |            |
| 149 | pt_hx_sa_other                                                                                                     | Patient History of Other Substance Abuse: Non-Opioid Substance Abuse?                                    | radio, Required<br><table border="1"> <tr><td>1</td><td>Yes</td></tr> </table>                                                                                                                                                                                  | 1 | Yes                  |                  |    |                      |                  |   |                      |            |
| 1   | Yes                                                                                                                |                                                                                                          |                                                                                                                                                                                                                                                                 |   |                      |                  |    |                      |                  |   |                      |            |

Bateman BT, Cole NM, Maeda A, Burns SM, Houle TT, Huybrechts KF, et al. Patterns of opioid prescription and use after cesarean delivery. *Obstet Gynecol* 2017; 130.

The authors provided this information as a supplement to their article.

©2017 American College of Obstetricians and Gynecologists.

|     |                                                                                      |                                                                                                      |                                                                                                                                                                                                                                                                                                                                                                                                                                                                                                                                                                                                                                     |   |                    |                  |            |                    |                  |   |                    |                       |   |                    |                     |   |                    |                                                      |   |                    |                               |   |                    |                              |
|-----|--------------------------------------------------------------------------------------|------------------------------------------------------------------------------------------------------|-------------------------------------------------------------------------------------------------------------------------------------------------------------------------------------------------------------------------------------------------------------------------------------------------------------------------------------------------------------------------------------------------------------------------------------------------------------------------------------------------------------------------------------------------------------------------------------------------------------------------------------|---|--------------------|------------------|------------|--------------------|------------------|---|--------------------|-----------------------|---|--------------------|---------------------|---|--------------------|------------------------------------------------------|---|--------------------|-------------------------------|---|--------------------|------------------------------|
|     |                                                                                      |                                                                                                      | <table border="1"> <tr> <td>2</td> <td>No</td> </tr> <tr> <td>3</td> <td>Unknown/NA</td> </tr> </table>                                                                                                                                                                                                                                                                                                                                                                                                                                                                                                                             | 2 | No                 | 3                | Unknown/NA |                    |                  |   |                    |                       |   |                    |                     |   |                    |                                                      |   |                    |                               |   |                    |                              |
| 2   | No                                                                                   |                                                                                                      |                                                                                                                                                                                                                                                                                                                                                                                                                                                                                                                                                                                                                                     |   |                    |                  |            |                    |                  |   |                    |                       |   |                    |                     |   |                    |                                                      |   |                    |                               |   |                    |                              |
| 3   | Unknown/NA                                                                           |                                                                                                      |                                                                                                                                                                                                                                                                                                                                                                                                                                                                                                                                                                                                                                     |   |                    |                  |            |                    |                  |   |                    |                       |   |                    |                     |   |                    |                                                      |   |                    |                               |   |                    |                              |
| 150 | <p>pt_hx_sa_type<br/>Show the field ONLY if:<br/>[pt_hx_sa_other] = '1'</p>          | If yes: What substances?                                                                             | checkbox <table border="1"> <tr> <td>1</td> <td>pt_hx_sa_type__1</td> <td>Marijuana</td> </tr> <tr> <td>2</td> <td>pt_hx_sa_type__2</td> <td>Cocaine</td> </tr> <tr> <td>3</td> <td>pt_hx_sa_type__3</td> <td>Other</td> </tr> <tr> <td>4</td> <td>pt_hx_sa_type__4</td> <td>Missing/Unavailable</td> </tr> </table>                                                                                                                                                                                                                                                                                                                | 1 | pt_hx_sa_type__1   | Marijuana        | 2          | pt_hx_sa_type__2   | Cocaine          | 3 | pt_hx_sa_type__3   | Other                 | 4 | pt_hx_sa_type__4   | Missing/Unavailable |   |                    |                                                      |   |                    |                               |   |                    |                              |
| 1   | pt_hx_sa_type__1                                                                     | Marijuana                                                                                            |                                                                                                                                                                                                                                                                                                                                                                                                                                                                                                                                                                                                                                     |   |                    |                  |            |                    |                  |   |                    |                       |   |                    |                     |   |                    |                                                      |   |                    |                               |   |                    |                              |
| 2   | pt_hx_sa_type__2                                                                     | Cocaine                                                                                              |                                                                                                                                                                                                                                                                                                                                                                                                                                                                                                                                                                                                                                     |   |                    |                  |            |                    |                  |   |                    |                       |   |                    |                     |   |                    |                                                      |   |                    |                               |   |                    |                              |
| 3   | pt_hx_sa_type__3                                                                     | Other                                                                                                |                                                                                                                                                                                                                                                                                                                                                                                                                                                                                                                                                                                                                                     |   |                    |                  |            |                    |                  |   |                    |                       |   |                    |                     |   |                    |                                                      |   |                    |                               |   |                    |                              |
| 4   | pt_hx_sa_type__4                                                                     | Missing/Unavailable                                                                                  |                                                                                                                                                                                                                                                                                                                                                                                                                                                                                                                                                                                                                                     |   |                    |                  |            |                    |                  |   |                    |                       |   |                    |                     |   |                    |                                                      |   |                    |                               |   |                    |                              |
| 151 | <p>pt_hx_sa_other_type<br/>Show the field ONLY if:<br/>[pt_hx_sa_type(3)] = '1'</p>  | If other: Specify                                                                                    | notes, Required                                                                                                                                                                                                                                                                                                                                                                                                                                                                                                                                                                                                                     |   |                    |                  |            |                    |                  |   |                    |                       |   |                    |                     |   |                    |                                                      |   |                    |                               |   |                    |                              |
| 152 | <p>other_sa_timing<br/>Show the field ONLY if:<br/>[pt_hx_sa_other] = '1'</p>        | If yes: When?                                                                                        | checkbox <table border="1"> <tr> <td>1</td> <td>other_sa_timing__1</td> <td>Before pregnancy</td> </tr> <tr> <td>2</td> <td>other_sa_timing__2</td> <td>During pregnancy</td> </tr> <tr> <td>3</td> <td>other_sa_timing__3</td> <td>Unknown/NA</td> </tr> </table>                                                                                                                                                                                                                                                                                                                                                                  | 1 | other_sa_timing__1 | Before pregnancy | 2          | other_sa_timing__2 | During pregnancy | 3 | other_sa_timing__3 | Unknown/NA            |   |                    |                     |   |                    |                                                      |   |                    |                               |   |                    |                              |
| 1   | other_sa_timing__1                                                                   | Before pregnancy                                                                                     |                                                                                                                                                                                                                                                                                                                                                                                                                                                                                                                                                                                                                                     |   |                    |                  |            |                    |                  |   |                    |                       |   |                    |                     |   |                    |                                                      |   |                    |                               |   |                    |                              |
| 2   | other_sa_timing__2                                                                   | During pregnancy                                                                                     |                                                                                                                                                                                                                                                                                                                                                                                                                                                                                                                                                                                                                                     |   |                    |                  |            |                    |                  |   |                    |                       |   |                    |                     |   |                    |                                                      |   |                    |                               |   |                    |                              |
| 3   | other_sa_timing__3                                                                   | Unknown/NA                                                                                           |                                                                                                                                                                                                                                                                                                                                                                                                                                                                                                                                                                                                                                     |   |                    |                  |            |                    |                  |   |                    |                       |   |                    |                     |   |                    |                                                      |   |                    |                               |   |                    |                              |
| 153 | comments_sa_hx                                                                       | Comments on substance abuse history:<br><i>Please write "NA" if no other substance abuse history</i> | notes                                                                                                                                                                                                                                                                                                                                                                                                                                                                                                                                                                                                                               |   |                    |                  |            |                    |                  |   |                    |                       |   |                    |                     |   |                    |                                                      |   |                    |                               |   |                    |                              |
| 154 | pt_med_hx                                                                            | Patient Medication History                                                                           | yesno, Required <table border="1"> <tr> <td>1</td> <td>Yes</td> </tr> <tr> <td>0</td> <td>No</td> </tr> </table>                                                                                                                                                                                                                                                                                                                                                                                                                                                                                                                    | 1 | Yes                | 0                | No         |                    |                  |   |                    |                       |   |                    |                     |   |                    |                                                      |   |                    |                               |   |                    |                              |
| 1   | Yes                                                                                  |                                                                                                      |                                                                                                                                                                                                                                                                                                                                                                                                                                                                                                                                                                                                                                     |   |                    |                  |            |                    |                  |   |                    |                       |   |                    |                     |   |                    |                                                      |   |                    |                               |   |                    |                              |
| 0   | No                                                                                   |                                                                                                      |                                                                                                                                                                                                                                                                                                                                                                                                                                                                                                                                                                                                                                     |   |                    |                  |            |                    |                  |   |                    |                       |   |                    |                     |   |                    |                                                      |   |                    |                               |   |                    |                              |
| 155 | <p>pt_meds_hx_list<br/>Show the field ONLY if:<br/>[pt_med_hx] = '1'</p>             | Which medications?<br><i>Note: Please check all that apply</i>                                       | checkbox <table border="1"> <tr> <td>1</td> <td>pt_meds_hx_list__1</td> <td>SSRIs</td> </tr> <tr> <td>2</td> <td>pt_meds_hx_list__2</td> <td>SNRIs</td> </tr> <tr> <td>3</td> <td>pt_meds_hx_list__3</td> <td>Other antidepressants</td> </tr> <tr> <td>4</td> <td>pt_meds_hx_list__4</td> <td>Benzodiazepines</td> </tr> <tr> <td>5</td> <td>pt_meds_hx_list__5</td> <td>Bipolar medications (anticonvulsants, lithium, etc.)</td> </tr> <tr> <td>6</td> <td>pt_meds_hx_list__6</td> <td>Other psychiatric medications</td> </tr> <tr> <td>7</td> <td>pt_meds_hx_list__7</td> <td>Other noteworthy medications</td> </tr> </table> | 1 | pt_meds_hx_list__1 | SSRIs            | 2          | pt_meds_hx_list__2 | SNRIs            | 3 | pt_meds_hx_list__3 | Other antidepressants | 4 | pt_meds_hx_list__4 | Benzodiazepines     | 5 | pt_meds_hx_list__5 | Bipolar medications (anticonvulsants, lithium, etc.) | 6 | pt_meds_hx_list__6 | Other psychiatric medications | 7 | pt_meds_hx_list__7 | Other noteworthy medications |
| 1   | pt_meds_hx_list__1                                                                   | SSRIs                                                                                                |                                                                                                                                                                                                                                                                                                                                                                                                                                                                                                                                                                                                                                     |   |                    |                  |            |                    |                  |   |                    |                       |   |                    |                     |   |                    |                                                      |   |                    |                               |   |                    |                              |
| 2   | pt_meds_hx_list__2                                                                   | SNRIs                                                                                                |                                                                                                                                                                                                                                                                                                                                                                                                                                                                                                                                                                                                                                     |   |                    |                  |            |                    |                  |   |                    |                       |   |                    |                     |   |                    |                                                      |   |                    |                               |   |                    |                              |
| 3   | pt_meds_hx_list__3                                                                   | Other antidepressants                                                                                |                                                                                                                                                                                                                                                                                                                                                                                                                                                                                                                                                                                                                                     |   |                    |                  |            |                    |                  |   |                    |                       |   |                    |                     |   |                    |                                                      |   |                    |                               |   |                    |                              |
| 4   | pt_meds_hx_list__4                                                                   | Benzodiazepines                                                                                      |                                                                                                                                                                                                                                                                                                                                                                                                                                                                                                                                                                                                                                     |   |                    |                  |            |                    |                  |   |                    |                       |   |                    |                     |   |                    |                                                      |   |                    |                               |   |                    |                              |
| 5   | pt_meds_hx_list__5                                                                   | Bipolar medications (anticonvulsants, lithium, etc.)                                                 |                                                                                                                                                                                                                                                                                                                                                                                                                                                                                                                                                                                                                                     |   |                    |                  |            |                    |                  |   |                    |                       |   |                    |                     |   |                    |                                                      |   |                    |                               |   |                    |                              |
| 6   | pt_meds_hx_list__6                                                                   | Other psychiatric medications                                                                        |                                                                                                                                                                                                                                                                                                                                                                                                                                                                                                                                                                                                                                     |   |                    |                  |            |                    |                  |   |                    |                       |   |                    |                     |   |                    |                                                      |   |                    |                               |   |                    |                              |
| 7   | pt_meds_hx_list__7                                                                   | Other noteworthy medications                                                                         |                                                                                                                                                                                                                                                                                                                                                                                                                                                                                                                                                                                                                                     |   |                    |                  |            |                    |                  |   |                    |                       |   |                    |                     |   |                    |                                                      |   |                    |                               |   |                    |                              |
| 156 | <p>psych_meds_classes<br/>Show the field ONLY if:<br/>[pt_meds_hx_list(6)] = '1'</p> | Please list class(es) of psychiatric medication(s)                                                   | notes                                                                                                                                                                                                                                                                                                                                                                                                                                                                                                                                                                                                                               |   |                    |                  |            |                    |                  |   |                    |                       |   |                    |                     |   |                    |                                                      |   |                    |                               |   |                    |                              |
| 157 | <p>other_medic_hist<br/>Show the field ONLY if:<br/>[pt_meds_hx_list(7)] = '1'</p>   | Please specify/list other medications:                                                               | notes                                                                                                                                                                                                                                                                                                                                                                                                                                                                                                                                                                                                                               |   |                    |                  |            |                    |                  |   |                    |                       |   |                    |                     |   |                    |                                                      |   |                    |                               |   |                    |                              |
| 158 | labor_prior_cs                                                                       | Labor prior to C/S?                                                                                  | radio, Required <table border="1"> <tr> <td>1</td> <td>Yes</td> </tr> </table>                                                                                                                                                                                                                                                                                                                                                                                                                                                                                                                                                      | 1 | Yes                |                  |            |                    |                  |   |                    |                       |   |                    |                     |   |                    |                                                      |   |                    |                               |   |                    |                              |
| 1   | Yes                                                                                  |                                                                                                      |                                                                                                                                                                                                                                                                                                                                                                                                                                                                                                                                                                                                                                     |   |                    |                  |            |                    |                  |   |                    |                       |   |                    |                     |   |                    |                                                      |   |                    |                               |   |                    |                              |

Bateman BT, Cole NM, Maeda A, Burns SM, Houle TT, Huybrechts KF, et al. Patterns of opioid prescription and use after cesarean delivery. *Obstet Gynecol* 2017; 130.

The authors provided this information as a supplement to their article.

©2017 American College of Obstetricians and Gynecologists.

|     |                                                                                   |                                                                                                                                                                                                  |                                                                                                                                                                                                                                                                                                                                                                                                                                                                                                                                                                                                                                       |   |                         |        |         |                         |                                                |   |                         |                                     |   |                         |                 |   |                         |                                    |   |                  |                     |   |                  |       |   |                  |         |
|-----|-----------------------------------------------------------------------------------|--------------------------------------------------------------------------------------------------------------------------------------------------------------------------------------------------|---------------------------------------------------------------------------------------------------------------------------------------------------------------------------------------------------------------------------------------------------------------------------------------------------------------------------------------------------------------------------------------------------------------------------------------------------------------------------------------------------------------------------------------------------------------------------------------------------------------------------------------|---|-------------------------|--------|---------|-------------------------|------------------------------------------------|---|-------------------------|-------------------------------------|---|-------------------------|-----------------|---|-------------------------|------------------------------------|---|------------------|---------------------|---|------------------|-------|---|------------------|---------|
|     |                                                                                   |                                                                                                                                                                                                  | <table border="1"> <tr> <td>2</td> <td>No</td> </tr> <tr> <td>3</td> <td>Unknown</td> </tr> </table>                                                                                                                                                                                                                                                                                                                                                                                                                                                                                                                                  | 2 | No                      | 3      | Unknown |                         |                                                |   |                         |                                     |   |                         |                 |   |                         |                                    |   |                  |                     |   |                  |       |   |                  |         |
| 2   | No                                                                                |                                                                                                                                                                                                  |                                                                                                                                                                                                                                                                                                                                                                                                                                                                                                                                                                                                                                       |   |                         |        |         |                         |                                                |   |                         |                                     |   |                         |                 |   |                         |                                    |   |                  |                     |   |                  |       |   |                  |         |
| 3   | Unknown                                                                           |                                                                                                                                                                                                  |                                                                                                                                                                                                                                                                                                                                                                                                                                                                                                                                                                                                                                       |   |                         |        |         |                         |                                                |   |                         |                                     |   |                         |                 |   |                         |                                    |   |                  |                     |   |                  |       |   |                  |         |
| 159 | indication_cs                                                                     | Indication for C/S:                                                                                                                                                                              | checkbox, Required <table border="1"> <tr> <td>1</td> <td>indication_cs__1</td> <td>Repeat</td> </tr> <tr> <td>2</td> <td>indication_cs__2</td> <td>Multiple gestation</td> </tr> <tr> <td>3</td> <td>indication_cs__3</td> <td>Dystocia</td> </tr> <tr> <td>4</td> <td>indication_cs__4</td> <td>Malpresentation</td> </tr> <tr> <td>5</td> <td>indication_cs__5</td> <td>Fetal distress documented</td> </tr> <tr> <td>8</td> <td>indication_cs__8</td> <td>Failure to progress</td> </tr> <tr> <td>6</td> <td>indication_cs__6</td> <td>Other</td> </tr> <tr> <td>7</td> <td>indication_cs__7</td> <td>Unknown</td> </tr> </table> | 1 | indication_cs__1        | Repeat | 2       | indication_cs__2        | Multiple gestation                             | 3 | indication_cs__3        | Dystocia                            | 4 | indication_cs__4        | Malpresentation | 5 | indication_cs__5        | Fetal distress documented          | 8 | indication_cs__8 | Failure to progress | 6 | indication_cs__6 | Other | 7 | indication_cs__7 | Unknown |
| 1   | indication_cs__1                                                                  | Repeat                                                                                                                                                                                           |                                                                                                                                                                                                                                                                                                                                                                                                                                                                                                                                                                                                                                       |   |                         |        |         |                         |                                                |   |                         |                                     |   |                         |                 |   |                         |                                    |   |                  |                     |   |                  |       |   |                  |         |
| 2   | indication_cs__2                                                                  | Multiple gestation                                                                                                                                                                               |                                                                                                                                                                                                                                                                                                                                                                                                                                                                                                                                                                                                                                       |   |                         |        |         |                         |                                                |   |                         |                                     |   |                         |                 |   |                         |                                    |   |                  |                     |   |                  |       |   |                  |         |
| 3   | indication_cs__3                                                                  | Dystocia                                                                                                                                                                                         |                                                                                                                                                                                                                                                                                                                                                                                                                                                                                                                                                                                                                                       |   |                         |        |         |                         |                                                |   |                         |                                     |   |                         |                 |   |                         |                                    |   |                  |                     |   |                  |       |   |                  |         |
| 4   | indication_cs__4                                                                  | Malpresentation                                                                                                                                                                                  |                                                                                                                                                                                                                                                                                                                                                                                                                                                                                                                                                                                                                                       |   |                         |        |         |                         |                                                |   |                         |                                     |   |                         |                 |   |                         |                                    |   |                  |                     |   |                  |       |   |                  |         |
| 5   | indication_cs__5                                                                  | Fetal distress documented                                                                                                                                                                        |                                                                                                                                                                                                                                                                                                                                                                                                                                                                                                                                                                                                                                       |   |                         |        |         |                         |                                                |   |                         |                                     |   |                         |                 |   |                         |                                    |   |                  |                     |   |                  |       |   |                  |         |
| 8   | indication_cs__8                                                                  | Failure to progress                                                                                                                                                                              |                                                                                                                                                                                                                                                                                                                                                                                                                                                                                                                                                                                                                                       |   |                         |        |         |                         |                                                |   |                         |                                     |   |                         |                 |   |                         |                                    |   |                  |                     |   |                  |       |   |                  |         |
| 6   | indication_cs__6                                                                  | Other                                                                                                                                                                                            |                                                                                                                                                                                                                                                                                                                                                                                                                                                                                                                                                                                                                                       |   |                         |        |         |                         |                                                |   |                         |                                     |   |                         |                 |   |                         |                                    |   |                  |                     |   |                  |       |   |                  |         |
| 7   | indication_cs__7                                                                  | Unknown                                                                                                                                                                                          |                                                                                                                                                                                                                                                                                                                                                                                                                                                                                                                                                                                                                                       |   |                         |        |         |                         |                                                |   |                         |                                     |   |                         |                 |   |                         |                                    |   |                  |                     |   |                  |       |   |                  |         |
| 160 | specify_fetal_distress<br>Show the field ONLY if:<br>[indication_cs(5)] = '1'     | Specify fetal distress documented:                                                                                                                                                               | notes, Required                                                                                                                                                                                                                                                                                                                                                                                                                                                                                                                                                                                                                       |   |                         |        |         |                         |                                                |   |                         |                                     |   |                         |                 |   |                         |                                    |   |                  |                     |   |                  |       |   |                  |         |
| 161 | specify_other_cs_indic<br>Show the field ONLY if:<br>[indication_cs(6)] = '1'     | Specify "other" indication:                                                                                                                                                                      | notes, Required                                                                                                                                                                                                                                                                                                                                                                                                                                                                                                                                                                                                                       |   |                         |        |         |                         |                                                |   |                         |                                     |   |                         |                 |   |                         |                                    |   |                  |                     |   |                  |       |   |                  |         |
| 162 | addl_surgical_proced                                                              | Additional Surgical Procedure(s)                                                                                                                                                                 | checkbox, Required <table border="1"> <tr> <td>1</td> <td>addl_surgical_proced__1</td> <td>None</td> </tr> <tr> <td>2</td> <td>addl_surgical_proced__2</td> <td>Closed rectus abdominus (review surgical note)</td> </tr> <tr> <td>3</td> <td>addl_surgical_proced__3</td> <td>Hysterectomy (review surgical note)</td> </tr> <tr> <td>5</td> <td>addl_surgical_proced__5</td> <td>Tubal ligation</td> </tr> <tr> <td>4</td> <td>addl_surgical_proced__4</td> <td>Other (check and can add comments)</td> </tr> </table>                                                                                                              | 1 | addl_surgical_proced__1 | None   | 2       | addl_surgical_proced__2 | Closed rectus abdominus (review surgical note) | 3 | addl_surgical_proced__3 | Hysterectomy (review surgical note) | 5 | addl_surgical_proced__5 | Tubal ligation  | 4 | addl_surgical_proced__4 | Other (check and can add comments) |   |                  |                     |   |                  |       |   |                  |         |
| 1   | addl_surgical_proced__1                                                           | None                                                                                                                                                                                             |                                                                                                                                                                                                                                                                                                                                                                                                                                                                                                                                                                                                                                       |   |                         |        |         |                         |                                                |   |                         |                                     |   |                         |                 |   |                         |                                    |   |                  |                     |   |                  |       |   |                  |         |
| 2   | addl_surgical_proced__2                                                           | Closed rectus abdominus (review surgical note)                                                                                                                                                   |                                                                                                                                                                                                                                                                                                                                                                                                                                                                                                                                                                                                                                       |   |                         |        |         |                         |                                                |   |                         |                                     |   |                         |                 |   |                         |                                    |   |                  |                     |   |                  |       |   |                  |         |
| 3   | addl_surgical_proced__3                                                           | Hysterectomy (review surgical note)                                                                                                                                                              |                                                                                                                                                                                                                                                                                                                                                                                                                                                                                                                                                                                                                                       |   |                         |        |         |                         |                                                |   |                         |                                     |   |                         |                 |   |                         |                                    |   |                  |                     |   |                  |       |   |                  |         |
| 5   | addl_surgical_proced__5                                                           | Tubal ligation                                                                                                                                                                                   |                                                                                                                                                                                                                                                                                                                                                                                                                                                                                                                                                                                                                                       |   |                         |        |         |                         |                                                |   |                         |                                     |   |                         |                 |   |                         |                                    |   |                  |                     |   |                  |       |   |                  |         |
| 4   | addl_surgical_proced__4                                                           | Other (check and can add comments)                                                                                                                                                               |                                                                                                                                                                                                                                                                                                                                                                                                                                                                                                                                                                                                                                       |   |                         |        |         |                         |                                                |   |                         |                                     |   |                         |                 |   |                         |                                    |   |                  |                     |   |                  |       |   |                  |         |
| 163 | other_surgic_proced<br>Show the field ONLY if:<br>[addl_surgical_proced(4)] = '1' | If other: Add other related comments                                                                                                                                                             | notes, Required                                                                                                                                                                                                                                                                                                                                                                                                                                                                                                                                                                                                                       |   |                         |        |         |                         |                                                |   |                         |                                     |   |                         |                 |   |                         |                                    |   |                  |                     |   |                  |       |   |                  |         |
| 164 | cs_complications                                                                  | Complications of C/S?<br><i>Note: If complications are unknown or difficult to surmise, please make a comment about it at the end of this form in the "Other Pertinent Patient Comments" box</i> | yesno, Required <table border="1"> <tr> <td>1</td> <td>Yes</td> </tr> <tr> <td>0</td> <td>No</td> </tr> </table>                                                                                                                                                                                                                                                                                                                                                                                                                                                                                                                      | 1 | Yes                     | 0      | No      |                         |                                                |   |                         |                                     |   |                         |                 |   |                         |                                    |   |                  |                     |   |                  |       |   |                  |         |
| 1   | Yes                                                                               |                                                                                                                                                                                                  |                                                                                                                                                                                                                                                                                                                                                                                                                                                                                                                                                                                                                                       |   |                         |        |         |                         |                                                |   |                         |                                     |   |                         |                 |   |                         |                                    |   |                  |                     |   |                  |       |   |                  |         |
| 0   | No                                                                                |                                                                                                                                                                                                  |                                                                                                                                                                                                                                                                                                                                                                                                                                                                                                                                                                                                                                       |   |                         |        |         |                         |                                                |   |                         |                                     |   |                         |                 |   |                         |                                    |   |                  |                     |   |                  |       |   |                  |         |
| 165 | specify_cs_complications<br>Show the field ONLY if:<br>[cs_complications] = '1'   | If yes: Specify complications                                                                                                                                                                    | notes, Required                                                                                                                                                                                                                                                                                                                                                                                                                                                                                                                                                                                                                       |   |                         |        |         |                         |                                                |   |                         |                                     |   |                         |                 |   |                         |                                    |   |                  |                     |   |                  |       |   |                  |         |
| 166 | anesth_mgmt                                                                       | Anesthetic Management<br><i>Note: Please check all that apply</i>                                                                                                                                | checkbox, Required <table border="1"> <tr> <td>1</td> <td>anesth_mgmt__1</td> <td>Spinal</td> </tr> <tr> <td>2</td> <td>anesth_mgmt__2</td> <td>Epidural</td> </tr> <tr> <td>3</td> <td>anesth_mgmt__3</td> <td>CSE</td> </tr> </table>                                                                                                                                                                                                                                                                                                                                                                                               | 1 | anesth_mgmt__1          | Spinal | 2       | anesth_mgmt__2          | Epidural                                       | 3 | anesth_mgmt__3          | CSE                                 |   |                         |                 |   |                         |                                    |   |                  |                     |   |                  |       |   |                  |         |
| 1   | anesth_mgmt__1                                                                    | Spinal                                                                                                                                                                                           |                                                                                                                                                                                                                                                                                                                                                                                                                                                                                                                                                                                                                                       |   |                         |        |         |                         |                                                |   |                         |                                     |   |                         |                 |   |                         |                                    |   |                  |                     |   |                  |       |   |                  |         |
| 2   | anesth_mgmt__2                                                                    | Epidural                                                                                                                                                                                         |                                                                                                                                                                                                                                                                                                                                                                                                                                                                                                                                                                                                                                       |   |                         |        |         |                         |                                                |   |                         |                                     |   |                         |                 |   |                         |                                    |   |                  |                     |   |                  |       |   |                  |         |
| 3   | anesth_mgmt__3                                                                    | CSE                                                                                                                                                                                              |                                                                                                                                                                                                                                                                                                                                                                                                                                                                                                                                                                                                                                       |   |                         |        |         |                         |                                                |   |                         |                                     |   |                         |                 |   |                         |                                    |   |                  |                     |   |                  |       |   |                  |         |

Bateman BT, Cole NM, Maeda A, Burns SM, Houle TT, Huybrechts KF, et al. Patterns of opioid prescription and use after cesarean delivery. *Obstet Gynecol* 2017; 130.

The authors provided this information as a supplement to their article.

©2017 American College of Obstetricians and Gynecologists.



|     |                                                                                    |                                                                                                                                           |                                                                                                                                                                                                                                                                                                                                                                                                                                                                                                                                                                               |   |                        |                    |    |                        |           |   |                        |                |   |                        |               |   |                        |       |   |                        |            |   |                        |      |
|-----|------------------------------------------------------------------------------------|-------------------------------------------------------------------------------------------------------------------------------------------|-------------------------------------------------------------------------------------------------------------------------------------------------------------------------------------------------------------------------------------------------------------------------------------------------------------------------------------------------------------------------------------------------------------------------------------------------------------------------------------------------------------------------------------------------------------------------------|---|------------------------|--------------------|----|------------------------|-----------|---|------------------------|----------------|---|------------------------|---------------|---|------------------------|-------|---|------------------------|------------|---|------------------------|------|
|     |                                                                                    |                                                                                                                                           | <table border="1"> <tr> <td>4</td> <td>anesth_mgmt__4</td> <td>General anesthesia</td> </tr> </table>                                                                                                                                                                                                                                                                                                                                                                                                                                                                         | 4 | anesth_mgmt__4         | General anesthesia |    |                        |           |   |                        |                |   |                        |               |   |                        |       |   |                        |            |   |                        |      |
| 4   | anesth_mgmt__4                                                                     | General anesthesia                                                                                                                        |                                                                                                                                                                                                                                                                                                                                                                                                                                                                                                                                                                               |   |                        |                    |    |                        |           |   |                        |                |   |                        |               |   |                        |       |   |                        |            |   |                        |      |
| 167 | postop_pain_mgmt                                                                   | Post-Operative Pain Management (after CS, prior to hospital discharge)<br><i>Note: Please check all that apply</i>                        | checkbox, Required<br><table border="1"> <tr> <td>1</td> <td>postop_pain_mgmt__1</td> <td>NSAIDS</td> </tr> <tr> <td>2</td> <td>postop_pain_mgmt__2</td> <td>Tylenol</td> </tr> <tr> <td>3</td> <td>postop_pain_mgmt__3</td> <td>Oral narcotics</td> </tr> <tr> <td>4</td> <td>postop_pain_mgmt__4</td> <td>PCA</td> </tr> <tr> <td>5</td> <td>postop_pain_mgmt__5</td> <td>Other</td> </tr> </table>                                                                                                                                                                         | 1 | postop_pain_mgmt__1    | NSAIDS             | 2  | postop_pain_mgmt__2    | Tylenol   | 3 | postop_pain_mgmt__3    | Oral narcotics | 4 | postop_pain_mgmt__4    | PCA           | 5 | postop_pain_mgmt__5    | Other |   |                        |            |   |                        |      |
| 1   | postop_pain_mgmt__1                                                                | NSAIDS                                                                                                                                    |                                                                                                                                                                                                                                                                                                                                                                                                                                                                                                                                                                               |   |                        |                    |    |                        |           |   |                        |                |   |                        |               |   |                        |       |   |                        |            |   |                        |      |
| 2   | postop_pain_mgmt__2                                                                | Tylenol                                                                                                                                   |                                                                                                                                                                                                                                                                                                                                                                                                                                                                                                                                                                               |   |                        |                    |    |                        |           |   |                        |                |   |                        |               |   |                        |       |   |                        |            |   |                        |      |
| 3   | postop_pain_mgmt__3                                                                | Oral narcotics                                                                                                                            |                                                                                                                                                                                                                                                                                                                                                                                                                                                                                                                                                                               |   |                        |                    |    |                        |           |   |                        |                |   |                        |               |   |                        |       |   |                        |            |   |                        |      |
| 4   | postop_pain_mgmt__4                                                                | PCA                                                                                                                                       |                                                                                                                                                                                                                                                                                                                                                                                                                                                                                                                                                                               |   |                        |                    |    |                        |           |   |                        |                |   |                        |               |   |                        |       |   |                        |            |   |                        |      |
| 5   | postop_pain_mgmt__5                                                                | Other                                                                                                                                     |                                                                                                                                                                                                                                                                                                                                                                                                                                                                                                                                                                               |   |                        |                    |    |                        |           |   |                        |                |   |                        |               |   |                        |       |   |                        |            |   |                        |      |
| 168 | specify_postop_pain_mgmt<br>Show the field ONLY if:<br>[postop_pain_mgmt(5)] = '1' | If other: Specify                                                                                                                         | notes, Required                                                                                                                                                                                                                                                                                                                                                                                                                                                                                                                                                               |   |                        |                    |    |                        |           |   |                        |                |   |                        |               |   |                        |       |   |                        |            |   |                        |      |
| 169 | breakthru_pain_y_n                                                                 | Indication of breakthrough pain or other issues in medical record?                                                                        | radio<br><table border="1"> <tr> <td>1</td> <td>Yes</td> </tr> <tr> <td>2</td> <td>No</td> </tr> <tr> <td>3</td> <td>Unknown</td> </tr> </table>                                                                                                                                                                                                                                                                                                                                                                                                                              | 1 | Yes                    | 2                  | No | 3                      | Unknown   |   |                        |                |   |                        |               |   |                        |       |   |                        |            |   |                        |      |
| 1   | Yes                                                                                |                                                                                                                                           |                                                                                                                                                                                                                                                                                                                                                                                                                                                                                                                                                                               |   |                        |                    |    |                        |           |   |                        |                |   |                        |               |   |                        |       |   |                        |            |   |                        |      |
| 2   | No                                                                                 |                                                                                                                                           |                                                                                                                                                                                                                                                                                                                                                                                                                                                                                                                                                                               |   |                        |                    |    |                        |           |   |                        |                |   |                        |               |   |                        |       |   |                        |            |   |                        |      |
| 3   | Unknown                                                                            |                                                                                                                                           |                                                                                                                                                                                                                                                                                                                                                                                                                                                                                                                                                                               |   |                        |                    |    |                        |           |   |                        |                |   |                        |               |   |                        |       |   |                        |            |   |                        |      |
| 170 | other_postop_issues                                                                | Check records for breakthrough pain and other issues, and please comment here:                                                            | notes                                                                                                                                                                                                                                                                                                                                                                                                                                                                                                                                                                         |   |                        |                    |    |                        |           |   |                        |                |   |                        |               |   |                        |       |   |                        |            |   |                        |      |
| 171 | pain_script_charact                                                                | Narcotic(s) script characteristics (in LMR)<br><i>Note: Please check all that apply</i>                                                   | checkbox, Required<br><table border="1"> <tr> <td>1</td> <td>pain_script_charact__1</td> <td>Hydrocodone</td> </tr> <tr> <td>2</td> <td>pain_script_charact__2</td> <td>Oxycodone</td> </tr> <tr> <td>3</td> <td>pain_script_charact__3</td> <td>Percocet</td> </tr> <tr> <td>4</td> <td>pain_script_charact__4</td> <td>Hydromorphone</td> </tr> <tr> <td>5</td> <td>pain_script_charact__5</td> <td>Other</td> </tr> <tr> <td>6</td> <td>pain_script_charact__6</td> <td>Unknown/NA</td> </tr> <tr> <td>7</td> <td>pain_script_charact__7</td> <td>None</td> </tr> </table> | 1 | pain_script_charact__1 | Hydrocodone        | 2  | pain_script_charact__2 | Oxycodone | 3 | pain_script_charact__3 | Percocet       | 4 | pain_script_charact__4 | Hydromorphone | 5 | pain_script_charact__5 | Other | 6 | pain_script_charact__6 | Unknown/NA | 7 | pain_script_charact__7 | None |
| 1   | pain_script_charact__1                                                             | Hydrocodone                                                                                                                               |                                                                                                                                                                                                                                                                                                                                                                                                                                                                                                                                                                               |   |                        |                    |    |                        |           |   |                        |                |   |                        |               |   |                        |       |   |                        |            |   |                        |      |
| 2   | pain_script_charact__2                                                             | Oxycodone                                                                                                                                 |                                                                                                                                                                                                                                                                                                                                                                                                                                                                                                                                                                               |   |                        |                    |    |                        |           |   |                        |                |   |                        |               |   |                        |       |   |                        |            |   |                        |      |
| 3   | pain_script_charact__3                                                             | Percocet                                                                                                                                  |                                                                                                                                                                                                                                                                                                                                                                                                                                                                                                                                                                               |   |                        |                    |    |                        |           |   |                        |                |   |                        |               |   |                        |       |   |                        |            |   |                        |      |
| 4   | pain_script_charact__4                                                             | Hydromorphone                                                                                                                             |                                                                                                                                                                                                                                                                                                                                                                                                                                                                                                                                                                               |   |                        |                    |    |                        |           |   |                        |                |   |                        |               |   |                        |       |   |                        |            |   |                        |      |
| 5   | pain_script_charact__5                                                             | Other                                                                                                                                     |                                                                                                                                                                                                                                                                                                                                                                                                                                                                                                                                                                               |   |                        |                    |    |                        |           |   |                        |                |   |                        |               |   |                        |       |   |                        |            |   |                        |      |
| 6   | pain_script_charact__6                                                             | Unknown/NA                                                                                                                                |                                                                                                                                                                                                                                                                                                                                                                                                                                                                                                                                                                               |   |                        |                    |    |                        |           |   |                        |                |   |                        |               |   |                        |       |   |                        |            |   |                        |      |
| 7   | pain_script_charact__7                                                             | None                                                                                                                                      |                                                                                                                                                                                                                                                                                                                                                                                                                                                                                                                                                                               |   |                        |                    |    |                        |           |   |                        |                |   |                        |               |   |                        |       |   |                        |            |   |                        |      |
| 172 | tab_number                                                                         | Tablet Number:                                                                                                                            | text, Required                                                                                                                                                                                                                                                                                                                                                                                                                                                                                                                                                                |   |                        |                    |    |                        |           |   |                        |                |   |                        |               |   |                        |       |   |                        |            |   |                        |      |
| 173 | pain_med_strength                                                                  | Strength (in mg)                                                                                                                          | text, Required                                                                                                                                                                                                                                                                                                                                                                                                                                                                                                                                                                |   |                        |                    |    |                        |           |   |                        |                |   |                        |               |   |                        |       |   |                        |            |   |                        |      |
| 174 | other_pain_med_script_info                                                         | Other relevant information about script?:<br><i>E.g., info on ibuprofen Rx; otherwise please write "none" if no other script comments</i> | notes                                                                                                                                                                                                                                                                                                                                                                                                                                                                                                                                                                         |   |                        |                    |    |                        |           |   |                        |                |   |                        |               |   |                        |       |   |                        |            |   |                        |      |
| 175 | other_comments_info                                                                | Other pertinent comments/information about patient?<br><i>Please write "none" if no other patient comments</i>                            | notes                                                                                                                                                                                                                                                                                                                                                                                                                                                                                                                                                                         |   |                        |                    |    |                        |           |   |                        |                |   |                        |               |   |                        |       |   |                        |            |   |                        |      |
| 176 | medical_record_data_collection_form_opioid_med_pos_complete                        | Complete?                                                                                                                                 | dropdown<br><table border="1"> <tr> <td>0</td> <td>Incomplete</td> </tr> </table>                                                                                                                                                                                                                                                                                                                                                                                                                                                                                             | 0 | Incomplete             |                    |    |                        |           |   |                        |                |   |                        |               |   |                        |       |   |                        |            |   |                        |      |
| 0   | Incomplete                                                                         |                                                                                                                                           |                                                                                                                                                                                                                                                                                                                                                                                                                                                                                                                                                                               |   |                        |                    |    |                        |           |   |                        |                |   |                        |               |   |                        |       |   |                        |            |   |                        |      |

Bateman BT, Cole NM, Maeda A, Burns SM, Houle TT, Huybrechts KF, et al. Patterns of opioid prescription and use after cesarean delivery. *Obstet Gynecol* 2017; 130.

The authors provided this information as a supplement to their article.

©2017 American College of Obstetricians and Gynecologists.

|                                                                       |                                                                                      |                                                                                                                                                                       |                                                                                                                                                                                                                                                                                                                                                                                                                                                                                                  |   |                       |                      |          |                       |                                                |   |                       |                                  |   |                       |                              |   |                       |                                                              |
|-----------------------------------------------------------------------|--------------------------------------------------------------------------------------|-----------------------------------------------------------------------------------------------------------------------------------------------------------------------|--------------------------------------------------------------------------------------------------------------------------------------------------------------------------------------------------------------------------------------------------------------------------------------------------------------------------------------------------------------------------------------------------------------------------------------------------------------------------------------------------|---|-----------------------|----------------------|----------|-----------------------|------------------------------------------------|---|-----------------------|----------------------------------|---|-----------------------|------------------------------|---|-----------------------|--------------------------------------------------------------|
|                                                                       |                                                                                      |                                                                                                                                                                       | <table border="1"> <tr> <td>1</td> <td>Unverified</td> </tr> <tr> <td>2</td> <td>Complete</td> </tr> </table>                                                                                                                                                                                                                                                                                                                                                                                    | 1 | Unverified            | 2                    | Complete |                       |                                                |   |                       |                                  |   |                       |                              |   |                       |                                                              |
| 1                                                                     | Unverified                                                                           |                                                                                                                                                                       |                                                                                                                                                                                                                                                                                                                                                                                                                                                                                                  |   |                       |                      |          |                       |                                                |   |                       |                                  |   |                       |                              |   |                       |                                                              |
| 2                                                                     | Complete                                                                             |                                                                                                                                                                       |                                                                                                                                                                                                                                                                                                                                                                                                                                                                                                  |   |                       |                      |          |                       |                                                |   |                       |                                  |   |                       |                              |   |                       |                                                              |
| <b>Instrument: Nonconsent Ineligibility And Lost To Follow Up Tra</b> |                                                                                      |                                                                                                                                                                       |                                                                                                                                                                                                                                                                                                                                                                                                                                                                                                  |   |                       |                      |          |                       |                                                |   |                       |                                  |   |                       |                              |   |                       |                                                              |
| 177                                                                   | excluded_record_id                                                                   | EXCLUSION Record ID<br><i>Each group is given a letter prefix (A-, B-, C-, etc) and you should then assign consecutive numbers after that (e.g., A1, A2, A3, etc)</i> | text                                                                                                                                                                                                                                                                                                                                                                                                                                                                                             |   |                       |                      |          |                       |                                                |   |                       |                                  |   |                       |                              |   |                       |                                                              |
| 178                                                                   | reason_exclusion                                                                     | Reason patient was not included:                                                                                                                                      | checkbox <table border="1"> <tr> <td>1</td> <td>reason_exclusion__1</td> <td>Did not consent</td> </tr> <tr> <td>2</td> <td>reason_exclusion__2</td> <td>Ineligible</td> </tr> <tr> <td>3</td> <td>reason_exclusion__3</td> <td>Lost to follow up</td> </tr> <tr> <td>4</td> <td>reason_exclusion__4</td> <td>Other</td> </tr> <tr> <td>5</td> <td>reason_exclusion__5</td> <td>Could not reach over the phone (never picked up phone calls)</td> </tr> </table>                                 | 1 | reason_exclusion__1   | Did not consent      | 2        | reason_exclusion__2   | Ineligible                                     | 3 | reason_exclusion__3   | Lost to follow up                | 4 | reason_exclusion__4   | Other                        | 5 | reason_exclusion__5   | Could not reach over the phone (never picked up phone calls) |
| 1                                                                     | reason_exclusion__1                                                                  | Did not consent                                                                                                                                                       |                                                                                                                                                                                                                                                                                                                                                                                                                                                                                                  |   |                       |                      |          |                       |                                                |   |                       |                                  |   |                       |                              |   |                       |                                                              |
| 2                                                                     | reason_exclusion__2                                                                  | Ineligible                                                                                                                                                            |                                                                                                                                                                                                                                                                                                                                                                                                                                                                                                  |   |                       |                      |          |                       |                                                |   |                       |                                  |   |                       |                              |   |                       |                                                              |
| 3                                                                     | reason_exclusion__3                                                                  | Lost to follow up                                                                                                                                                     |                                                                                                                                                                                                                                                                                                                                                                                                                                                                                                  |   |                       |                      |          |                       |                                                |   |                       |                                  |   |                       |                              |   |                       |                                                              |
| 4                                                                     | reason_exclusion__4                                                                  | Other                                                                                                                                                                 |                                                                                                                                                                                                                                                                                                                                                                                                                                                                                                  |   |                       |                      |          |                       |                                                |   |                       |                                  |   |                       |                              |   |                       |                                                              |
| 5                                                                     | reason_exclusion__5                                                                  | Could not reach over the phone (never picked up phone calls)                                                                                                          |                                                                                                                                                                                                                                                                                                                                                                                                                                                                                                  |   |                       |                      |          |                       |                                                |   |                       |                                  |   |                       |                              |   |                       |                                                              |
| 179                                                                   | exclusion_reason_other<br>Show the field ONLY if:<br>[reason_exclusion(4)] = '1'     | If other: Please specify                                                                                                                                              | notes                                                                                                                                                                                                                                                                                                                                                                                                                                                                                            |   |                       |                      |          |                       |                                                |   |                       |                                  |   |                       |                              |   |                       |                                                              |
| 180                                                                   | reasons_nonconsent                                                                   | If explicitly did not consent:<br>Why?                                                                                                                                | checkbox <table border="1"> <tr> <td>1</td> <td>reasons_nonconsent__1</td> <td>Too busy/overwhelmed</td> </tr> <tr> <td>2</td> <td>reasons_nonconsent__2</td> <td>Bad experience, did not wish to discuss</td> </tr> <tr> <td>3</td> <td>reasons_nonconsent__3</td> <td>Generally disinterested in study</td> </tr> <tr> <td>4</td> <td>reasons_nonconsent__4</td> <td>No concrete reason provided</td> </tr> <tr> <td>5</td> <td>reasons_nonconsent__5</td> <td>Other</td> </tr> </table>       | 1 | reasons_nonconsent__1 | Too busy/overwhelmed | 2        | reasons_nonconsent__2 | Bad experience, did not wish to discuss        | 3 | reasons_nonconsent__3 | Generally disinterested in study | 4 | reasons_nonconsent__4 | No concrete reason provided  | 5 | reasons_nonconsent__5 | Other                                                        |
| 1                                                                     | reasons_nonconsent__1                                                                | Too busy/overwhelmed                                                                                                                                                  |                                                                                                                                                                                                                                                                                                                                                                                                                                                                                                  |   |                       |                      |          |                       |                                                |   |                       |                                  |   |                       |                              |   |                       |                                                              |
| 2                                                                     | reasons_nonconsent__2                                                                | Bad experience, did not wish to discuss                                                                                                                               |                                                                                                                                                                                                                                                                                                                                                                                                                                                                                                  |   |                       |                      |          |                       |                                                |   |                       |                                  |   |                       |                              |   |                       |                                                              |
| 3                                                                     | reasons_nonconsent__3                                                                | Generally disinterested in study                                                                                                                                      |                                                                                                                                                                                                                                                                                                                                                                                                                                                                                                  |   |                       |                      |          |                       |                                                |   |                       |                                  |   |                       |                              |   |                       |                                                              |
| 4                                                                     | reasons_nonconsent__4                                                                | No concrete reason provided                                                                                                                                           |                                                                                                                                                                                                                                                                                                                                                                                                                                                                                                  |   |                       |                      |          |                       |                                                |   |                       |                                  |   |                       |                              |   |                       |                                                              |
| 5                                                                     | reasons_nonconsent__5                                                                | Other                                                                                                                                                                 |                                                                                                                                                                                                                                                                                                                                                                                                                                                                                                  |   |                       |                      |          |                       |                                                |   |                       |                                  |   |                       |                              |   |                       |                                                              |
| 181                                                                   | reasons_ineligible<br>Show the field ONLY if:<br>[reason_exclusion(2)] = '1'         | If ineligible: Why?                                                                                                                                                   | checkbox <table border="1"> <tr> <td>1</td> <td>reasons_ineligible__1</td> <td>Language barrier</td> </tr> <tr> <td>2</td> <td>reasons_ineligible__2</td> <td>Did not recall receiving materials from doctor</td> </tr> <tr> <td>3</td> <td>reasons_ineligible__3</td> <td>Prolonged hospital stay &gt;7 days</td> </tr> <tr> <td>4</td> <td>reasons_ineligible__4</td> <td>Past history of opioid abuse</td> </tr> <tr> <td>5</td> <td>reasons_ineligible__5</td> <td>Other</td> </tr> </table> | 1 | reasons_ineligible__1 | Language barrier     | 2        | reasons_ineligible__2 | Did not recall receiving materials from doctor | 3 | reasons_ineligible__3 | Prolonged hospital stay >7 days  | 4 | reasons_ineligible__4 | Past history of opioid abuse | 5 | reasons_ineligible__5 | Other                                                        |
| 1                                                                     | reasons_ineligible__1                                                                | Language barrier                                                                                                                                                      |                                                                                                                                                                                                                                                                                                                                                                                                                                                                                                  |   |                       |                      |          |                       |                                                |   |                       |                                  |   |                       |                              |   |                       |                                                              |
| 2                                                                     | reasons_ineligible__2                                                                | Did not recall receiving materials from doctor                                                                                                                        |                                                                                                                                                                                                                                                                                                                                                                                                                                                                                                  |   |                       |                      |          |                       |                                                |   |                       |                                  |   |                       |                              |   |                       |                                                              |
| 3                                                                     | reasons_ineligible__3                                                                | Prolonged hospital stay >7 days                                                                                                                                       |                                                                                                                                                                                                                                                                                                                                                                                                                                                                                                  |   |                       |                      |          |                       |                                                |   |                       |                                  |   |                       |                              |   |                       |                                                              |
| 4                                                                     | reasons_ineligible__4                                                                | Past history of opioid abuse                                                                                                                                          |                                                                                                                                                                                                                                                                                                                                                                                                                                                                                                  |   |                       |                      |          |                       |                                                |   |                       |                                  |   |                       |                              |   |                       |                                                              |
| 5                                                                     | reasons_ineligible__5                                                                | Other                                                                                                                                                                 |                                                                                                                                                                                                                                                                                                                                                                                                                                                                                                  |   |                       |                      |          |                       |                                                |   |                       |                                  |   |                       |                              |   |                       |                                                              |
| 182                                                                   | other_reasons_nonconsent<br>Show the field ONLY if:<br>[reasons_nonconsent(5)] = '1' | If other: Please specify                                                                                                                                              | notes                                                                                                                                                                                                                                                                                                                                                                                                                                                                                            |   |                       |                      |          |                       |                                                |   |                       |                                  |   |                       |                              |   |                       |                                                              |
| 183                                                                   | excluded_ans_3_questions                                                             | Was patient able to answer some or all of the "three questions"?                                                                                                      | yesno <table border="1"> <tr> <td>1</td> <td>Yes</td> </tr> <tr> <td>0</td> <td>No</td> </tr> </table>                                                                                                                                                                                                                                                                                                                                                                                           | 1 | Yes                   | 0                    | No       |                       |                                                |   |                       |                                  |   |                       |                              |   |                       |                                                              |
| 1                                                                     | Yes                                                                                  |                                                                                                                                                                       |                                                                                                                                                                                                                                                                                                                                                                                                                                                                                                  |   |                       |                      |          |                       |                                                |   |                       |                                  |   |                       |                              |   |                       |                                                              |
| 0                                                                     | No                                                                                   |                                                                                                                                                                       |                                                                                                                                                                                                                                                                                                                                                                                                                                                                                                  |   |                       |                      |          |                       |                                                |   |                       |                                  |   |                       |                              |   |                       |                                                              |
| 184                                                                   | excluded_highest_pain_wk                                                             | If yes: What was your highest                                                                                                                                         | text                                                                                                                                                                                                                                                                                                                                                                                                                                                                                             |   |                       |                      |          |                       |                                                |   |                       |                                  |   |                       |                              |   |                       |                                                              |

Bateman BT, Cole NM, Maeda A, Burns SM, Houle TT, Huybrechts KF, et al. Patterns of opioid prescription and use after cesarean delivery. *Obstet Gynecol* 2017; 130.

The authors provided this information as a supplement to their article.

©2017 American College of Obstetricians and Gynecologists.

|     |                                                                                          |                                                                                                                                         |                                                                                                                                                                                                                                                                                                                                                                                                                                                                                                                                                                                                                                                           |   |                              |                                                                 |            |                              |                                  |   |                              |                              |              |                              |                   |   |                              |       |    |                               |                                                         |
|-----|------------------------------------------------------------------------------------------|-----------------------------------------------------------------------------------------------------------------------------------------|-----------------------------------------------------------------------------------------------------------------------------------------------------------------------------------------------------------------------------------------------------------------------------------------------------------------------------------------------------------------------------------------------------------------------------------------------------------------------------------------------------------------------------------------------------------------------------------------------------------------------------------------------------------|---|------------------------------|-----------------------------------------------------------------|------------|------------------------------|----------------------------------|---|------------------------------|------------------------------|--------------|------------------------------|-------------------|---|------------------------------|-------|----|-------------------------------|---------------------------------------------------------|
|     | Show the field ONLY if:<br>[excluded_ans_3_questions] = '1'                              | pain level related to CS from 0-10 over past week?<br><i>Write NA if patient unable to answer this particular question of the three</i> |                                                                                                                                                                                                                                                                                                                                                                                                                                                                                                                                                                                                                                                           |   |                              |                                                                 |            |                              |                                  |   |                              |                              |              |                              |                   |   |                              |       |    |                               |                                                         |
| 185 | excluded_satisfaction_mgh<br>Show the field ONLY if:<br>[excluded_ans_3_questions] = '1' | If yes: What was your overall satisfaction with [name institution] after your CS?                                                       | radio<br><table border="1"> <tr><td>1</td><td>Very satisfied</td></tr> <tr><td>2</td><td>Satisfied</td></tr> <tr><td>3</td><td>Slightly satisfied</td></tr> <tr><td>4</td><td>Slightly dissatisfied</td></tr> <tr><td>5</td><td>Dissatisfied</td></tr> <tr><td>6</td><td>Very dissatisfied</td></tr> <tr><td>7</td><td>Did not answer</td></tr> </table>                                                                                                                                                                                                                                                                                                  | 1 | Very satisfied               | 2                                                               | Satisfied  | 3                            | Slightly satisfied               | 4 | Slightly dissatisfied        | 5                            | Dissatisfied | 6                            | Very dissatisfied | 7 | Did not answer               |       |    |                               |                                                         |
| 1   | Very satisfied                                                                           |                                                                                                                                         |                                                                                                                                                                                                                                                                                                                                                                                                                                                                                                                                                                                                                                                           |   |                              |                                                                 |            |                              |                                  |   |                              |                              |              |                              |                   |   |                              |       |    |                               |                                                         |
| 2   | Satisfied                                                                                |                                                                                                                                         |                                                                                                                                                                                                                                                                                                                                                                                                                                                                                                                                                                                                                                                           |   |                              |                                                                 |            |                              |                                  |   |                              |                              |              |                              |                   |   |                              |       |    |                               |                                                         |
| 3   | Slightly satisfied                                                                       |                                                                                                                                         |                                                                                                                                                                                                                                                                                                                                                                                                                                                                                                                                                                                                                                                           |   |                              |                                                                 |            |                              |                                  |   |                              |                              |              |                              |                   |   |                              |       |    |                               |                                                         |
| 4   | Slightly dissatisfied                                                                    |                                                                                                                                         |                                                                                                                                                                                                                                                                                                                                                                                                                                                                                                                                                                                                                                                           |   |                              |                                                                 |            |                              |                                  |   |                              |                              |              |                              |                   |   |                              |       |    |                               |                                                         |
| 5   | Dissatisfied                                                                             |                                                                                                                                         |                                                                                                                                                                                                                                                                                                                                                                                                                                                                                                                                                                                                                                                           |   |                              |                                                                 |            |                              |                                  |   |                              |                              |              |                              |                   |   |                              |       |    |                               |                                                         |
| 6   | Very dissatisfied                                                                        |                                                                                                                                         |                                                                                                                                                                                                                                                                                                                                                                                                                                                                                                                                                                                                                                                           |   |                              |                                                                 |            |                              |                                  |   |                              |                              |              |                              |                   |   |                              |       |    |                               |                                                         |
| 7   | Did not answer                                                                           |                                                                                                                                         |                                                                                                                                                                                                                                                                                                                                                                                                                                                                                                                                                                                                                                                           |   |                              |                                                                 |            |                              |                                  |   |                              |                              |              |                              |                   |   |                              |       |    |                               |                                                         |
| 186 | excluded_take_opioids<br>Show the field ONLY if:<br>[excluded_ans_3_questions] = '1'     | If yes: Did you take any opioid pain medication for pain control after left hospital?                                                   | radio<br><table border="1"> <tr><td>1</td><td>Yes</td></tr> <tr><td>2</td><td>No</td></tr> <tr><td>3</td><td>Don't know</td></tr> <tr><td>4</td><td>Did not answer</td></tr> </table>                                                                                                                                                                                                                                                                                                                                                                                                                                                                     | 1 | Yes                          | 2                                                               | No         | 3                            | Don't know                       | 4 | Did not answer               |                              |              |                              |                   |   |                              |       |    |                               |                                                         |
| 1   | Yes                                                                                      |                                                                                                                                         |                                                                                                                                                                                                                                                                                                                                                                                                                                                                                                                                                                                                                                                           |   |                              |                                                                 |            |                              |                                  |   |                              |                              |              |                              |                   |   |                              |       |    |                               |                                                         |
| 2   | No                                                                                       |                                                                                                                                         |                                                                                                                                                                                                                                                                                                                                                                                                                                                                                                                                                                                                                                                           |   |                              |                                                                 |            |                              |                                  |   |                              |                              |              |                              |                   |   |                              |       |    |                               |                                                         |
| 3   | Don't know                                                                               |                                                                                                                                         |                                                                                                                                                                                                                                                                                                                                                                                                                                                                                                                                                                                                                                                           |   |                              |                                                                 |            |                              |                                  |   |                              |                              |              |                              |                   |   |                              |       |    |                               |                                                         |
| 4   | Did not answer                                                                           |                                                                                                                                         |                                                                                                                                                                                                                                                                                                                                                                                                                                                                                                                                                                                                                                                           |   |                              |                                                                 |            |                              |                                  |   |                              |                              |              |                              |                   |   |                              |       |    |                               |                                                         |
| 187 | excluded_why_no_ans_quest<br>Show the field ONLY if:<br>[excluded_ans_3_questions] = '0' | If no: Why didn't/couldn't the patient answer the "three questions"?                                                                    | checkbox<br><table border="1"> <tr><td>5</td><td>excluded_why_no_ans_quest__5</td><td>Did not understand questions (language barrier or other reason)</td></tr> <tr><td>6</td><td>excluded_why_no_ans_quest__6</td><td>Did not want to answer questions</td></tr> <tr><td>7</td><td>excluded_why_no_ans_quest__7</td><td>Had to get off phone/hung up</td></tr> <tr><td>8</td><td>excluded_why_no_ans_quest__8</td><td>Forgot to ask</td></tr> <tr><td>9</td><td>excluded_why_no_ans_quest__9</td><td>Other</td></tr> <tr><td>10</td><td>excluded_why_no_ans_quest__10</td><td>Not applicable to our institution (not approved by IRB)</td></tr> </table> | 5 | excluded_why_no_ans_quest__5 | Did not understand questions (language barrier or other reason) | 6          | excluded_why_no_ans_quest__6 | Did not want to answer questions | 7 | excluded_why_no_ans_quest__7 | Had to get off phone/hung up | 8            | excluded_why_no_ans_quest__8 | Forgot to ask     | 9 | excluded_why_no_ans_quest__9 | Other | 10 | excluded_why_no_ans_quest__10 | Not applicable to our institution (not approved by IRB) |
| 5   | excluded_why_no_ans_quest__5                                                             | Did not understand questions (language barrier or other reason)                                                                         |                                                                                                                                                                                                                                                                                                                                                                                                                                                                                                                                                                                                                                                           |   |                              |                                                                 |            |                              |                                  |   |                              |                              |              |                              |                   |   |                              |       |    |                               |                                                         |
| 6   | excluded_why_no_ans_quest__6                                                             | Did not want to answer questions                                                                                                        |                                                                                                                                                                                                                                                                                                                                                                                                                                                                                                                                                                                                                                                           |   |                              |                                                                 |            |                              |                                  |   |                              |                              |              |                              |                   |   |                              |       |    |                               |                                                         |
| 7   | excluded_why_no_ans_quest__7                                                             | Had to get off phone/hung up                                                                                                            |                                                                                                                                                                                                                                                                                                                                                                                                                                                                                                                                                                                                                                                           |   |                              |                                                                 |            |                              |                                  |   |                              |                              |              |                              |                   |   |                              |       |    |                               |                                                         |
| 8   | excluded_why_no_ans_quest__8                                                             | Forgot to ask                                                                                                                           |                                                                                                                                                                                                                                                                                                                                                                                                                                                                                                                                                                                                                                                           |   |                              |                                                                 |            |                              |                                  |   |                              |                              |              |                              |                   |   |                              |       |    |                               |                                                         |
| 9   | excluded_why_no_ans_quest__9                                                             | Other                                                                                                                                   |                                                                                                                                                                                                                                                                                                                                                                                                                                                                                                                                                                                                                                                           |   |                              |                                                                 |            |                              |                                  |   |                              |                              |              |                              |                   |   |                              |       |    |                               |                                                         |
| 10  | excluded_why_no_ans_quest__10                                                            | Not applicable to our institution (not approved by IRB)                                                                                 |                                                                                                                                                                                                                                                                                                                                                                                                                                                                                                                                                                                                                                                           |   |                              |                                                                 |            |                              |                                  |   |                              |                              |              |                              |                   |   |                              |       |    |                               |                                                         |
| 188 | excluded_other_no_ans<br>Show the field ONLY if:<br>[excluded_why_no_ans_quest(9)] = '1' | If other: Please specify                                                                                                                | notes                                                                                                                                                                                                                                                                                                                                                                                                                                                                                                                                                                                                                                                     |   |                              |                                                                 |            |                              |                                  |   |                              |                              |              |                              |                   |   |                              |       |    |                               |                                                         |
| 189 | nonconsent_ineligibility_and_loss_to_follow_up_tra_complete                              | Complete?                                                                                                                               | dropdown<br><table border="1"> <tr><td>0</td><td>Incomplete</td></tr> <tr><td>1</td><td>Unverified</td></tr> <tr><td>2</td><td>Complete</td></tr> </table>                                                                                                                                                                                                                                                                                                                                                                                                                                                                                                | 0 | Incomplete                   | 1                                                               | Unverified | 2                            | Complete                         |   |                              |                              |              |                              |                   |   |                              |       |    |                               |                                                         |
| 0   | Incomplete                                                                               |                                                                                                                                         |                                                                                                                                                                                                                                                                                                                                                                                                                                                                                                                                                                                                                                                           |   |                              |                                                                 |            |                              |                                  |   |                              |                              |              |                              |                   |   |                              |       |    |                               |                                                         |
| 1   | Unverified                                                                               |                                                                                                                                         |                                                                                                                                                                                                                                                                                                                                                                                                                                                                                                                                                                                                                                                           |   |                              |                                                                 |            |                              |                                  |   |                              |                              |              |                              |                   |   |                              |       |    |                               |                                                         |
| 2   | Complete                                                                                 |                                                                                                                                         |                                                                                                                                                                                                                                                                                                                                                                                                                                                                                                                                                                                                                                                           |   |                              |                                                                 |            |                              |                                  |   |                              |                              |              |                              |                   |   |                              |       |    |                               |                                                         |

Bateman BT, Cole NM, Maeda A, Burns SM, Houle TT, Huybrechts KF, et al. Patterns of opioid prescription and use after cesarean delivery. *Obstet Gynecol* 2017; 130.

The authors provided this information as a supplement to their article.

©2017 American College of Obstetricians and Gynecologists.

## **Appendix 2. Reasons for Exclusion**

Ineligibility (n=35): n=15 had a language barrier, n=1 did not recall receiving materials from doctor, n=5 had prolonged hospital stay (>7 days), n=8 had a past history of opioid abuse, n=6 other.

Non-consent (n=55): n=11 were too busy/overwhelmed, n=2 had a bad experience and did not wish to discuss, n=20 were generally disinterested in the study, n=22 other.

Could not be reached (n=252): who were excluded because they could not be reached by phone after 2 weeks after discharge from CD.

### Appendix 3. Reasons for Not Filling an Opioid Prescription After Cesarean Delivery

|                                                  | <b>N (%)</b> |
|--------------------------------------------------|--------------|
| <b>Total</b>                                     | 105          |
| <b>Did not need/want</b>                         | 91 (87%)     |
| <b>Do not like how they make me feel</b>         | 12 (11%)     |
| <b>Bad side effects from previous experience</b> | 9 (9%)       |
| <b>Forgot to fill it</b>                         | 0 (0%)       |
| <b>Co-pay too expensive</b>                      | 0 (0%)       |
| <b>Already had a bottle of leftover pills</b>    | 1 (1%)       |
| <b>Other</b>                                     | 8 (8%)       |

\*Multiple reasons can be given

**Appendix 4. Pain Scores for Women Who Did and Did Not Fill a Prescription for an Opioid Analgesic**

| <b>Pain scores (median[IQR])</b>            | <b>Filled Prescription (n=615)</b> | <b>Did Not Fill Prescription (n=105)</b> | <b>p-value</b> |
|---------------------------------------------|------------------------------------|------------------------------------------|----------------|
| <b>Day of CD</b>                            | 6 [4 to 8]                         | 5 [3 to 6]                               | <0.001         |
| <b>Until hospital discharge</b>             | 6 [4 to 7]                         | 5 [3 to, 7]                              | 0.002          |
| <b>Immediately after hospital discharge</b> | 5 [3, to 6]                        | 3 [2, to 5]                              | <0.001         |
| <b>First week after discharge</b>           | 4 [2 to, 5]                        | 3 [2 to, 5]                              | <0.001         |
| <b>Second week after discharge</b>          | 2 [1 to, 3]                        | 1 [0 to, 2]                              | <0.001         |

\*Pain score 0 to 10

**Appendix 5. Patient-Reported Opioid-Related Side Effects Stratified by Tertiles of the Number of Opioid Analgesic Tablets Dispensed**

|                                 | Tertile Dispensed (N, (%)) |                          |                       | Overall  |
|---------------------------------|----------------------------|--------------------------|-----------------------|----------|
|                                 | ≤30 Tablets<br>(n=237)     | 31-40 Tablets<br>(n=299) | >40 Tablets<br>(n=69) |          |
| <b>Drowsiness</b>               | 57 (24)                    | 94 (31)                  | 29 (42)               | 182 (29) |
| <b>Nausea/Vomiting</b>          | 5 (2)                      | 12 (4)                   | 4 (6)                 | 21 (3)   |
| <b>Abdominal discomfort</b>     | 2 (<1)                     | 6 (2)                    | 5 (7)                 | 13 (2)   |
| <b>Constipation</b>             | 56 (24)                    | 120 (40)                 | 30 (43)               | 209 (34) |
| <b>Dizziness</b>                | 5 (2)                      | 19 (6)                   | 12 (17)               | 36 (6)   |
| <b>Confusion</b>                | 3 (1)                      | 6 (2)                    | 2 (3)                 | 11 (2)   |
| <b>Insomnia/Sleeping issues</b> | 0 (<1)                     | 1 (<1)                   | 1 (1)                 | 2 (<1)   |
| <b>Itching</b>                  | 2 (<1)                     | 8 (3)                    | 10 (14)               | 20 (3)   |
| <b>Difficult urination</b>      | 0 (<1)                     | 1 (<1)                   | 1 (1)                 | 2 (<1)   |
| <b>Mood swings</b>              | 1 (<1)                     | 4 (1)                    | 6 (9)                 | 11 (2)   |
| <b>Other</b>                    | 7 (3)                      | 22 (7)                   | 5 (7)                 | 34 (6)   |

Bateman BT, Cole NM, Maeda A, Burns SM, Houle TT, Huybrechts KF, et al. Patterns of opioid prescription and use after cesarean delivery. *Obstet Gynecol* 2017; 130.

The authors provided this information as a supplement to their article.

©2017 American College of Obstetricians and Gynecologists.



**Appendix 6. Results of the negative binomial regression predicting the number of opioid tablets consumed, as a function of the number of tablets dispensed accounting for patient characteristics. IRR, incidence rate ratio; CI, confidence interval; NSAID, nonsteroidal anti-inflammatory drug.**

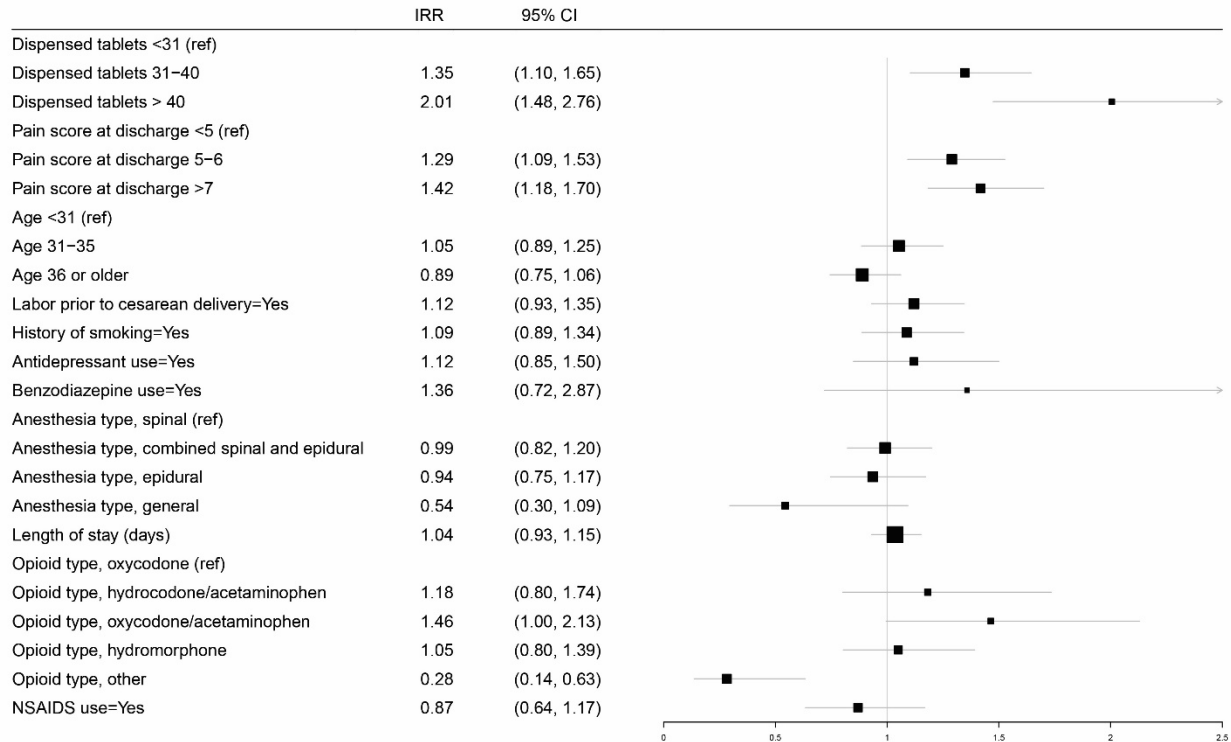

Bateman BT, Cole NM, Maeda A, Burns SM, Houle TT, Huybrechts KF, et al. Patterns of opioid prescription and use after cesarean delivery. *Obstet Gynecol* 2017; 130.

The authors provided this information as a supplement to their article.

©2017 American College of Obstetricians and Gynecologists.
